# Supplementary material for: N-Hydroxy–N-oxide photoinduced tautomerization and excitation wavelength dependent luminescence of ESIPT-capable zinc(ii) complexes with a rationally designed 1-hydroxy-2,4-di(pyridin-2-yl)-1H-imidazole ESIPT-ligand
Source: Royal Society of Chemistry journal article supplement (doi:10.1039/d2dt01232d), 2022-01-01
Supplement: d2dt01232d1.pdf [file d2dt01232d1.pdf]

*Electronic Supplementary Information*

## **N-Hydroxy – N-oxide photoinduced tautomerization and excitation wavelength dependent luminescence of ESIPT-capable zinc(II) complexes with a rationally designed 1-hydroxy-2,4-di(pyridin-2-yl)-1*H*-imidazole ESIPT-ligand**

Nikita A. Shekhovtsov,<sup>\*a</sup> Katerina A. Vinogradova,<sup>a</sup> Sofia N. Vorobyova,<sup>a</sup> Alexey S. Berezin,<sup>a</sup>  
Victor F. Plyusnin,<sup>b</sup> Dmitry Yu. Naumov,<sup>a</sup> Natalia V. Pervukhina,<sup>a</sup> Elena B. Nikolaenkova,<sup>c</sup>  
Alexsei Ya. Tikhonov<sup>c</sup> and Mark B. Bushuev<sup>\*a</sup>

<sup>a</sup> *Nikolaev Institute of Inorganic Chemistry, Siberian Branch of Russian Academy of Sciences, 3, Acad. Lavrentiev Ave., Novosibirsk, 630090, Russia. E-mail addresses: shekhovtsov@niic.nsc.ru (Nikita A. Shekhovtsov), bushuev@niic.nsc.ru (Mark B. Bushuev). Fax: +7 383 330 94 89; Tel: +7 383 316 51 43.*

<sup>b</sup> *Institute of Chemical Kinetics and Combustion, Siberian Branch of Russian Academy of Sciences, 3, Institutskaya str., Novosibirsk, 630090, Russia*

<sup>c</sup> *N. N. Vorozhtsov Novosibirsk Institute of Organic Chemistry, Siberian Branch of Russian Academy of Sciences, 9, Acad. Lavrentiev Ave., Novosibirsk, 630090, Russia.*

## Table of contents

|                 |    |
|-----------------|----|
| Table S1.....   | 5  |
| Figure S1.....  | 6  |
| Figure S2.....  | 6  |
| Figure S3.....  | 6  |
| Figure S4.....  | 7  |
| Figure S5.....  | 7  |
| Figure S6.....  | 7  |
| Figure S7.....  | 7  |
| Figure S8.....  | 8  |
| Figure S9.....  | 8  |
| Figure S10..... | 8  |
| Figure S11..... | 8  |
| Figure S12..... | 9  |
| Figure S13..... | 9  |
| Figure S14..... | 10 |
| Figure S15..... | 11 |
| Figure S16..... | 11 |
| Figure S17..... | 11 |
| Figure S18..... | 12 |
| Figure S19..... | 12 |
| Figure S20..... | 13 |
| Table S2a.....  | 14 |
| Table S2b.....  | 14 |
| Figure S21..... | 15 |
| Figure S22..... | 15 |
| Figure S23..... | 16 |
| Figure S24..... | 16 |
| Figure S25..... | 17 |
| Table S3.....   | 17 |
| Table S4.....   | 18 |
| Table S5.....   | 18 |
| Table S6.....   | 19 |
| Table S7.....   | 20 |
| Table S8.....   | 21 |

|                 |    |
|-----------------|----|
| Table S9.....   | 21 |
| Table S10.....  | 22 |
| Table S11.....  | 23 |
| Table S12.....  | 24 |
| Table S13.....  | 24 |
| Table S14.....  | 25 |
| Table S15.....  | 26 |
| Table S16.....  | 26 |
| Table S17.....  | 27 |
| Table S18.....  | 28 |
| Table S19.....  | 29 |
| Table S20.....  | 29 |
| Table S21.....  | 31 |
| Table S22.....  | 31 |
| Figure S26..... | 33 |
| Figure S27..... | 33 |
| Table S23.....  | 33 |
| Table S24.....  | 34 |
| Table S25.....  | 35 |
| Table S26.....  | 36 |
| Table S27.....  | 37 |
| Table S28.....  | 37 |
| Table S29.....  | 39 |
| Table S30.....  | 40 |
| Table S31.....  | 41 |
| Table S32.....  | 42 |
| Table S33.....  | 43 |
| Table S34.....  | 44 |
| Table S35.....  | 45 |
| Table S36.....  | 46 |
| Table S37.....  | 48 |
| Table S38.....  | 49 |
| Table S39.....  | 50 |
| Table S40.....  | 51 |
| Table S41.....  | 53 |
| Table S42.....  | 53 |
| Table S43.....  | 54 |

|                 |    |
|-----------------|----|
| Table S44.....  | 54 |
| Table S45.....  | 55 |
| Table S46.....  | 55 |
| Table S47.....  | 56 |
| Figure S28..... | 56 |

**Table S1.** Crystal data and structure refinement for **1 – 3**.

| Complex                                         | <b>1</b>                                                           | <b>2</b>                                                           | <b>3</b>                                                          |
|-------------------------------------------------|--------------------------------------------------------------------|--------------------------------------------------------------------|-------------------------------------------------------------------|
| Empirical formula                               | C <sub>14</sub> H <sub>12</sub> Cl <sub>2</sub> N <sub>4</sub> OZn | C <sub>14</sub> H <sub>12</sub> Br <sub>2</sub> N <sub>4</sub> OZn | C <sub>14</sub> H <sub>12</sub> I <sub>2</sub> N <sub>4</sub> OZn |
| Formula weight                                  | 388.55                                                             | 477.47                                                             | 571.45                                                            |
| Crystal system                                  | Monoclinic                                                         |                                                                    |                                                                   |
| Space group, Z                                  | P2 <sub>1</sub> /c, 4                                              |                                                                    |                                                                   |
| a(Å)                                            | 11.4076(3)                                                         | 11.6350(3)                                                         | 12.0424(9)                                                        |
| b(Å)                                            | 7.9255(2)                                                          | 7.9633(3)                                                          | 8.1386(6)                                                         |
| c(Å)                                            | 16.5642(3)                                                         | 16.9065(5)                                                         | 17.4214(15)                                                       |
| β(°)                                            | 91.408(1)                                                          | 91.484(1)                                                          | 91.506(2)                                                         |
| V(Å <sup>3</sup> )                              | 1497.13(6)                                                         | 1565.91(9)                                                         | 1706.9(2)                                                         |
| d <sub>Calc</sub> (g/cm <sup>3</sup> )          | 1.724                                                              | 2.025                                                              | 2.224                                                             |
| μ (mm <sup>-1</sup> )                           | 2.003                                                              | 6.677                                                              | 5.062                                                             |
| F(000)                                          | 784                                                                | 928                                                                | 1072                                                              |
| Crystal size (mm)                               | 0.250 x 0.120 x 0.080                                              | 0.250 x 0.120 x 0.080                                              | 0.250 x 0.150 x 0.050                                             |
| Theta range for data collection (°)             | 2.460 - 26.019                                                     | 2.410 - 26.021                                                     | 2.339 - 26.022                                                    |
| Index ranges                                    | -14 ≤ h ≤ 13<br>-9 ≤ k ≤ 9<br>-16 ≤ l ≤ 20                         | -14 ≤ h ≤ 14<br>-9 ≤ k ≤ 9<br>-20 ≤ l ≤ 20                         | -11 ≤ h ≤ 14<br>-10 ≤ k ≤ 9<br>-21 ≤ l ≤ 21                       |
| Reflections collected                           | 10188                                                              | 11925                                                              | 11233                                                             |
| Independent reflections (R <sub>int</sub> )     | 2951 (R <sub>int</sub> = 0.0363)                                   | 3079 9 (R <sub>int</sub> = 0.0357)                                 | 3346 (R <sub>int</sub> = 0.0498)                                  |
| Completeness to theta = 25.500°                 | 99.9 %                                                             | 99.8 %                                                             | 99.8 %                                                            |
| Data / restraints / parameters                  | 2951 / 0 / 210                                                     | 3079 / 0 / 210                                                     | 3346 / 0 / 210                                                    |
| Goodness-of-fit on F <sup>2</sup>               | 1.032                                                              | 1.072                                                              | 1.163                                                             |
| Final R indices (I>2σ <sub>I</sub> )            | R <sub>1</sub> = 0.0280, wR <sub>2</sub> = 0.0712                  | R <sub>1</sub> = 0.0321, wR <sub>2</sub> = 0.0710                  | R <sub>1</sub> = 0.0493, wR <sub>2</sub> = 0.1234                 |
| R indices (all data)                            | R <sub>1</sub> = 0.0308, wR <sub>2</sub> = 0.0723                  | R <sub>1</sub> = 0.0390, wR <sub>2</sub> = 0.0729                  | R <sub>1</sub> = 0.0541, wR <sub>2</sub> = 0.1257                 |
| Largest diff. peak and hole (e/Å <sup>3</sup> ) | 0.542 and -0.333                                                   | 0.870 and -0.450                                                   | 2.288 and -1.513                                                  |

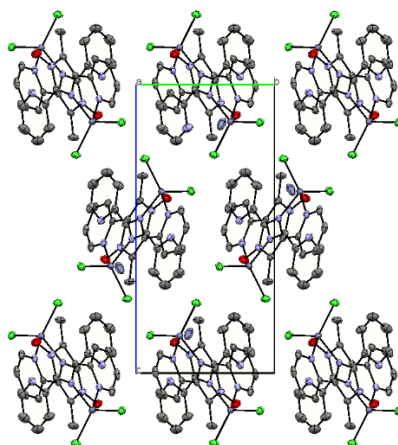

**Figure S1.** Packing of **1** (view along the *a* axis).

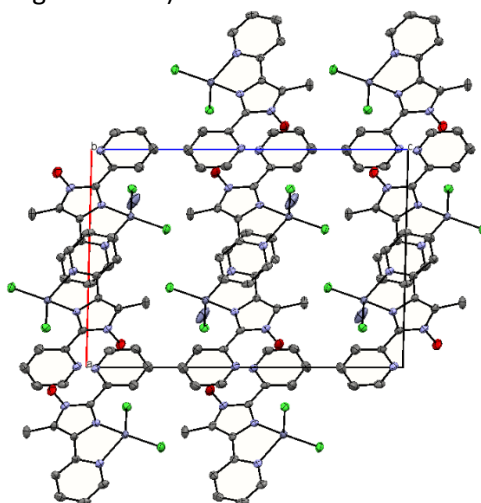

**Figure S2.** Packing of **1** (view along the *b* axis).

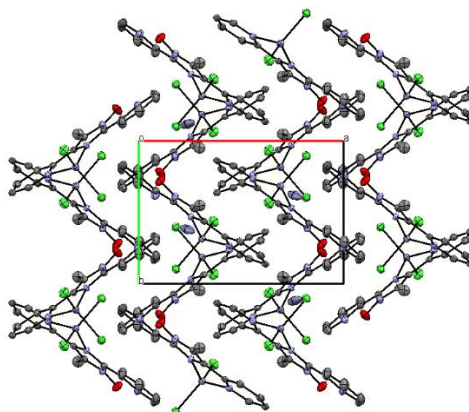

**Figure S3.** Packing of **1** (view along the *c* axis).

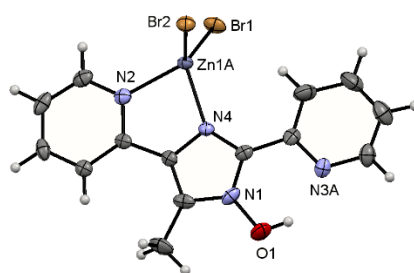

**Figure S4.** Molecular structure of the major component of  $[\text{Zn}(\text{HL})\text{Br}_2]$  in the structure of **2**.

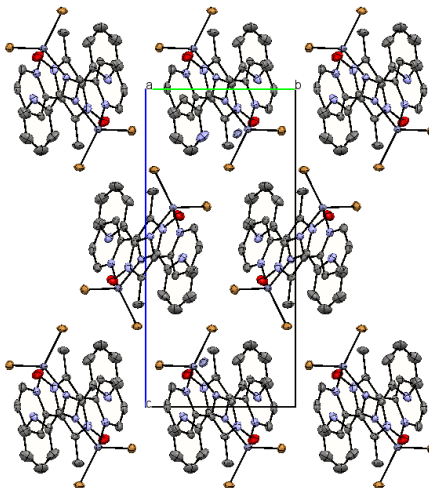

**Figure S5.** Packing of **2** (view along the *a* axis).

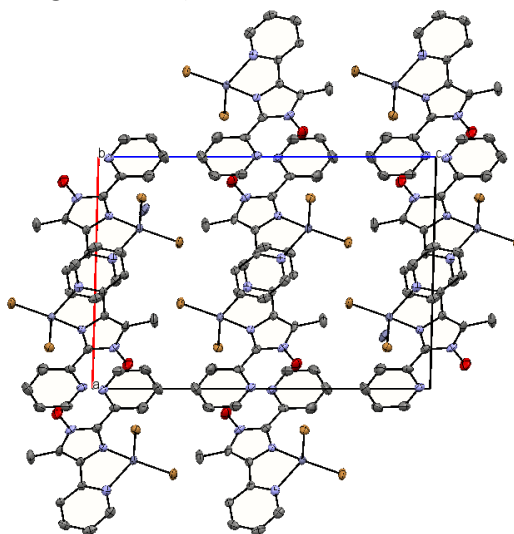

**Figure S6.** Packing of **2** (view along the *b* axis).

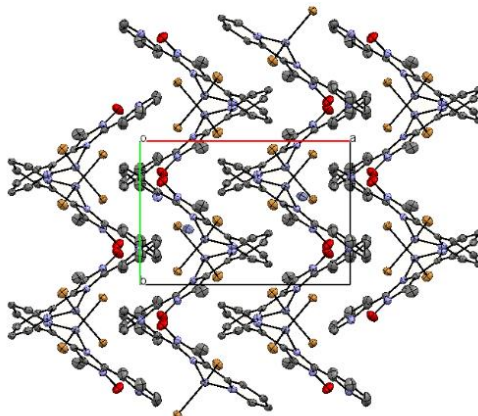

**Figure S7.** Packing of **2** (view along the *c* axis).

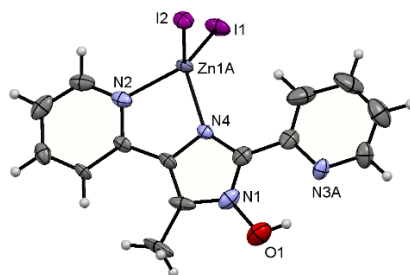

**Figure S8.** Molecular structure of the major component of  $[\text{Zn}(\text{HL})\text{I}_2]$  in the structure of **3**.

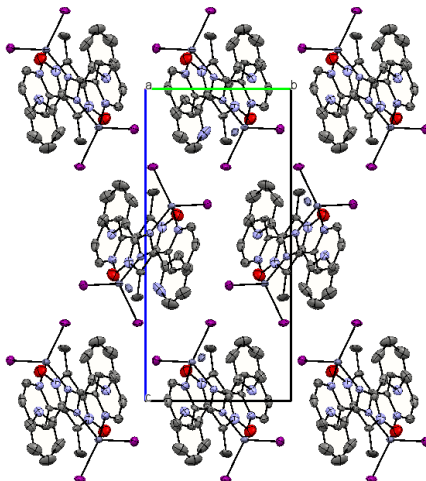

**Figure S9.** Packing of **3** (view along the *a* axis).

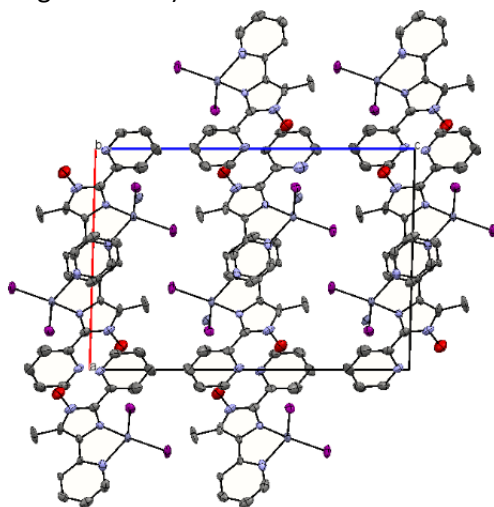

**Figure S10.** Packing of **3** (view along the *b* axis).

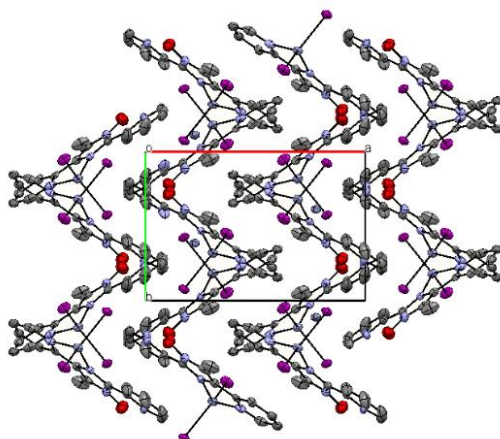

**Figure S11.** Packing of **3** (view along the *c* axis).



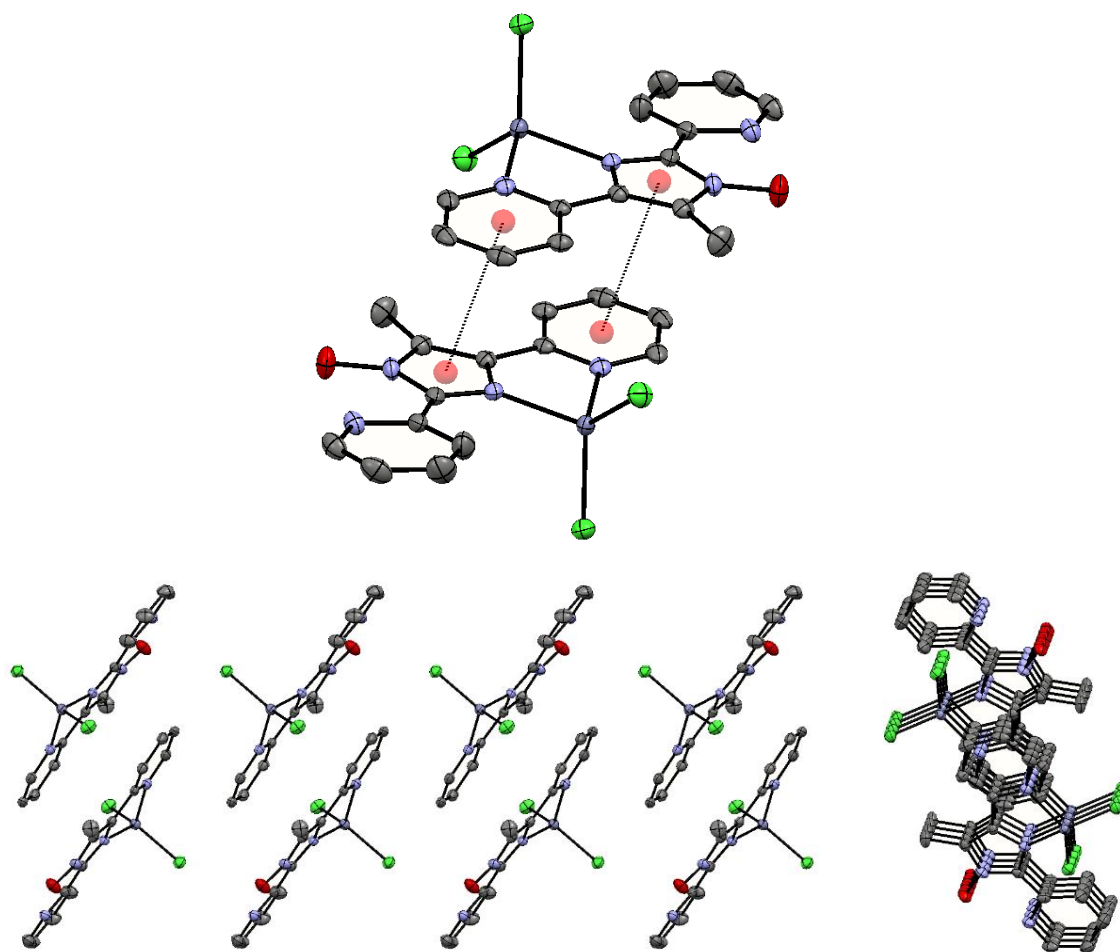

**Figure S12.** Supramolecular dimeric associates and supramolecular chains in the structure of **1**.

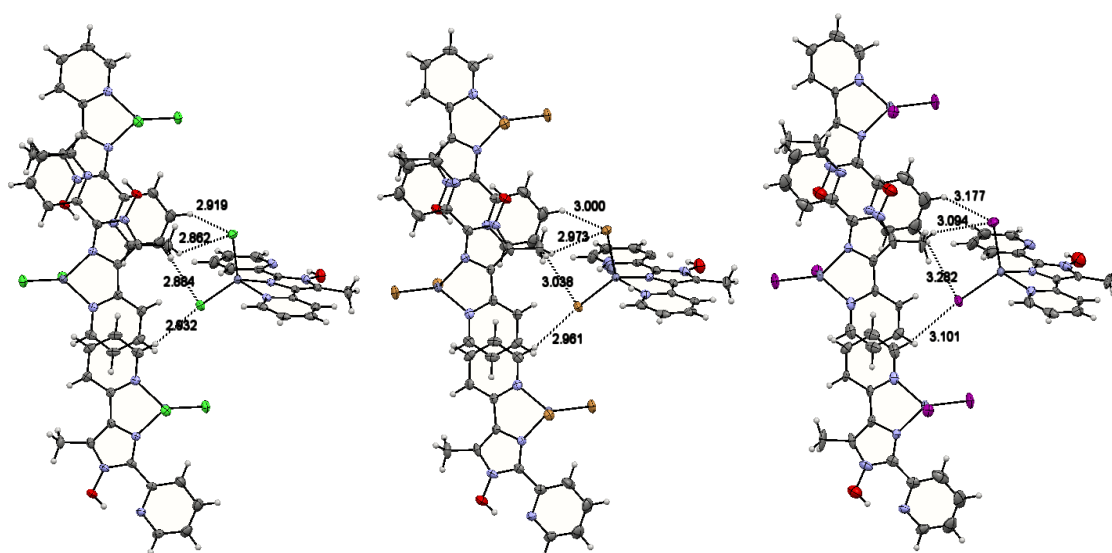

**Figure S13.** C–H...Hal contacts in the structures of **1**, **2** and **3**.

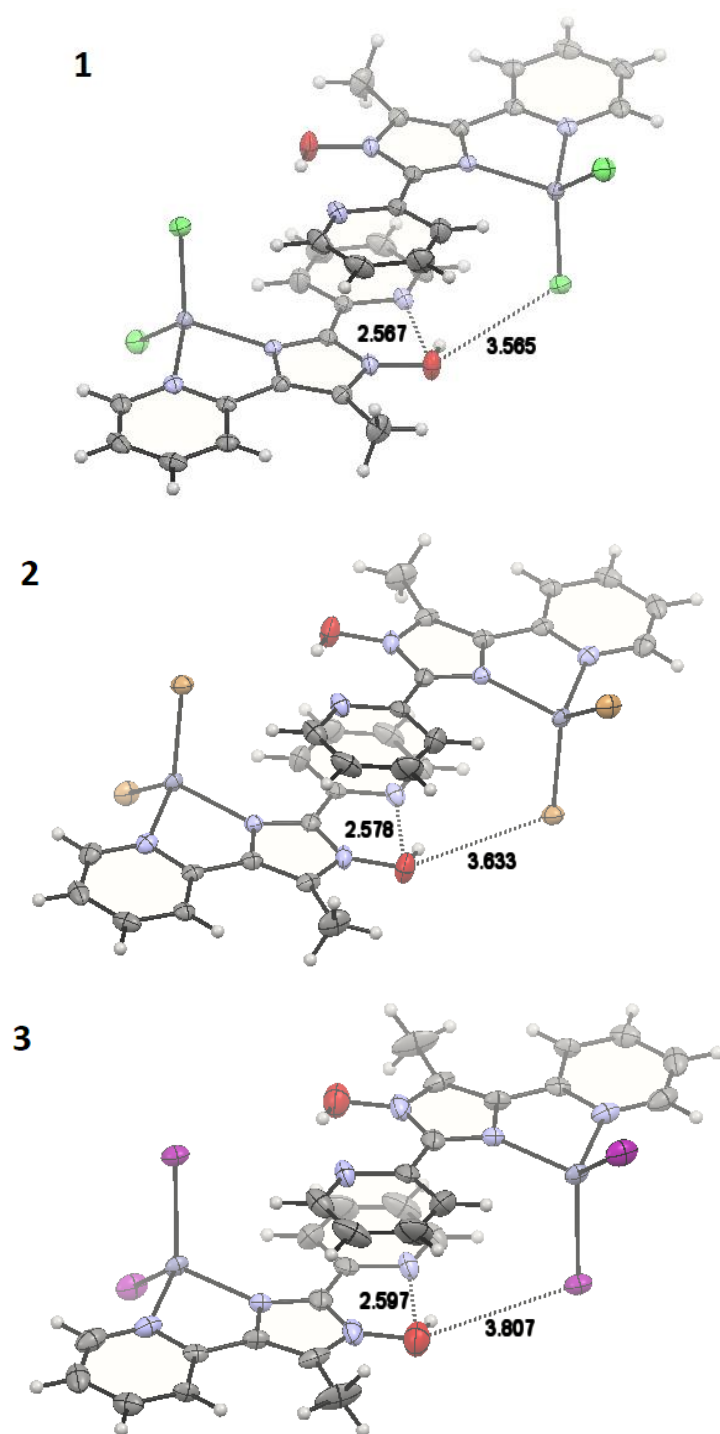

**Figure S14.** Intra- and intermolecular hydrogen bonds in the structures of **1**, **2** and **3**.

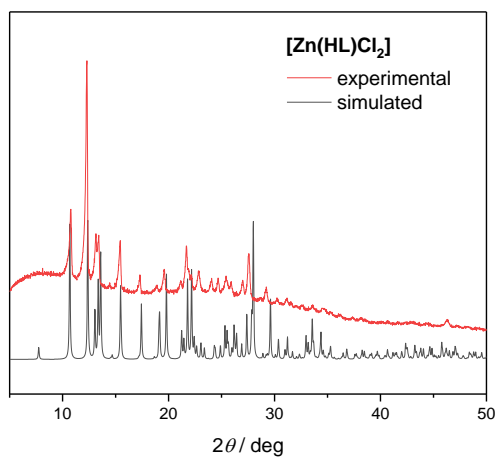

**Figure S15.** X-ray powder diffraction patterns of  $[\text{Zn}(\text{HL})\text{Cl}_2]$ .

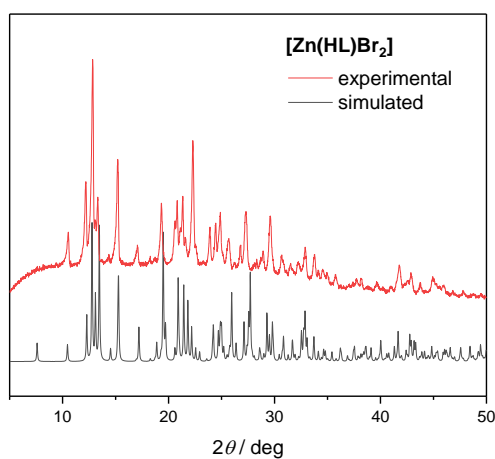

**Figure S16.** X-ray powder diffraction patterns of  $[\text{Zn}(\text{HL})\text{Br}_2]$ .

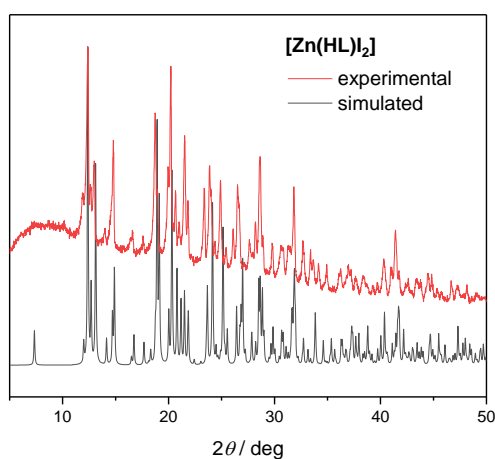

**Figure S17.** X-ray powder diffraction patterns of  $[\text{Zn}(\text{HL})\text{I}_2]$ .

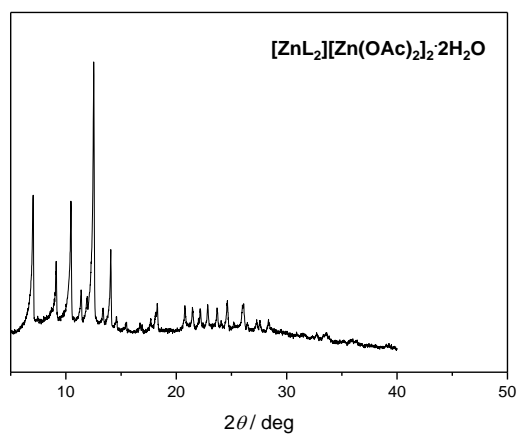

**Figure S18.** X-ray powder diffraction pattern of  $[\text{ZnL}_2][\text{Zn}(\text{OAc})_2]_2 \cdot 2\text{H}_2\text{O}$ .

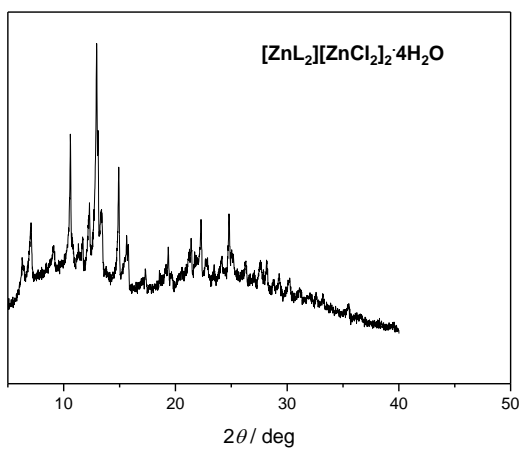

**Figure S19.** X-ray powder diffraction pattern of  $[\text{ZnL}_2][\text{ZnCl}_2]_2 \cdot 4\text{H}_2\text{O}$ .

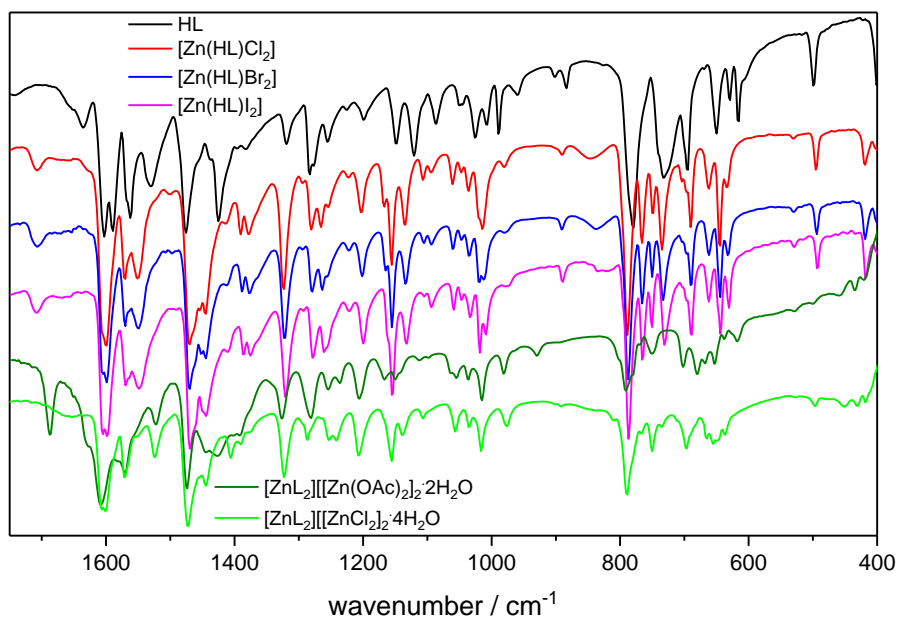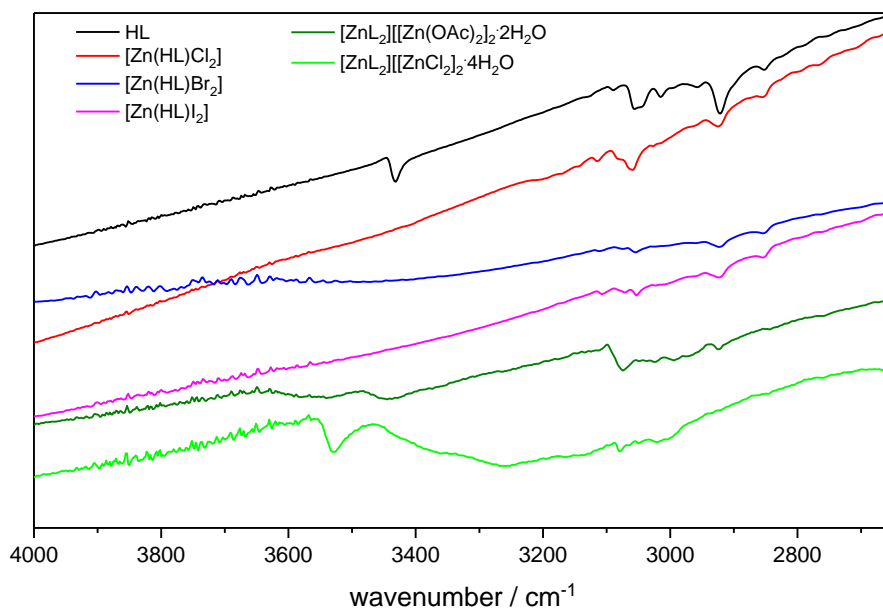

**Figure S20.** IR spectra of HL,  $[\text{Zn}(\text{HL})\text{Cl}_2]$ ,  $[\text{Zn}(\text{HL})\text{Br}_2]$ ,  $[\text{Zn}(\text{HL})\text{I}_2]$ ,  $[\text{ZnL}_2][\text{Zn}(\text{OAc})_2]_2 \cdot 2\text{H}_2\text{O}$  and  $[\text{ZnL}_2][\text{ZnCl}_2]_2 \cdot 4\text{H}_2\text{O}$  in KBr (top) and fluorinated oil (bottom).

**Table S2a.** Photoluminescence lifetimes recorded for **ZnHLCI<sub>2</sub>**, **ZnHLBr<sub>2</sub>** and **ZnHLI<sub>2</sub>** in the solid state.

| Compound                      | T, K | $\lambda_{ex}$ , nm <sup>a</sup> | $\lambda_{det}$ , nm <sup>b</sup> | $\tau$ , ns <sup>c</sup> |
|-------------------------------|------|----------------------------------|-----------------------------------|--------------------------|
| <b>[Zn(HL)Cl<sub>2</sub>]</b> | 300  | 375                              | 575                               | 1.2, 3.5                 |
|                               |      |                                  | 700                               | 1.3, 4.0                 |
|                               | 77   | 375                              | 500                               | 1.7, 3.6                 |
|                               |      |                                  | 530                               | 1.9, 3.7                 |
|                               |      |                                  | 600                               | 2.0, 4.3                 |
| <b>[Zn(HL)Br<sub>2</sub>]</b> | 300  | 375                              | 535                               | 0.7, 1.5                 |
|                               |      |                                  | 700                               | 0.9, 1.6                 |
|                               | 77   | 375                              | 500                               | 2.1, 3.5                 |
|                               |      |                                  | 560                               | 1.5, 3.3                 |
|                               |      |                                  | 650                               | 1.6, 3.7                 |
| <b>[Zn(HL)I<sub>2</sub>]</b>  | 300  | 375                              | 560                               | 0.2, 1.1                 |
|                               |      |                                  | 700                               | 0.2, 1.0, 2.6            |
|                               | 77   | 375                              | 500                               | 1.6, 3.3                 |
|                               |      |                                  | 540                               | 1.5, 3.2                 |
|                               |      |                                  | 600                               | 1.6, 3.5                 |

a – excitation wavelength

b – detection wavelength

c – emission decay was analyzed with two or three components :  $I = \sum_i A_i \exp(-t/\tau_i)$ **Table S2b.** Photoluminescence quantum yields (PLQY) recorded for **ZnHLCI<sub>2</sub>**, **ZnHLBr<sub>2</sub>** and **ZnHLI<sub>2</sub>** in the solid state.

| Compound                      | T, K | $\lambda_{ex}$ , nm <sup>a</sup> | PLQY, % |
|-------------------------------|------|----------------------------------|---------|
| <b>[Zn(HL)Cl<sub>2</sub>]</b> | 300  | 300                              | 4       |
|                               |      | 400                              | 11      |
|                               | 77   | 300                              | 12      |
|                               |      | 400                              | 25      |
| <b>[Zn(HL)Br<sub>2</sub>]</b> | 300  | 300                              | 4       |
|                               |      | 400                              | 11      |
|                               | 77   | 300                              | 9       |
|                               |      | 400                              | 27      |
| <b>[Zn(HL)I<sub>2</sub>]</b>  | 300  | 300                              | 3       |
|                               |      | 400                              | 8       |
|                               | 77   | 300                              | 5       |
|                               |      | 400                              | 13      |

a – excitation wavelength

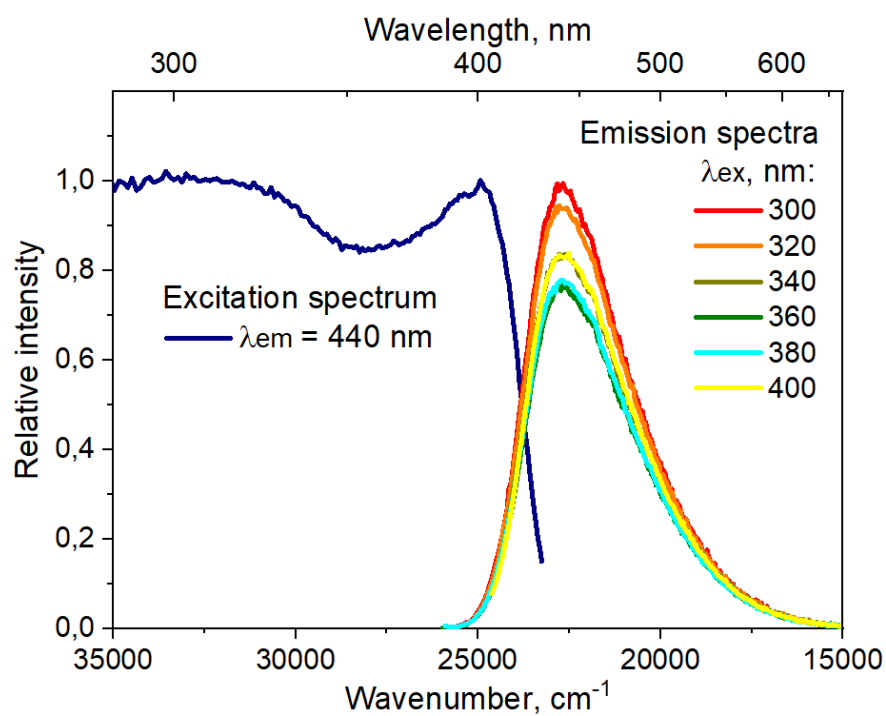

**Figure S21.** Excitation and emission spectra of  $[\text{ZnL}_2][\text{Zn}(\text{OAc})_2]_2 \cdot 2\text{H}_2\text{O}$  in the solid state at 300 K.

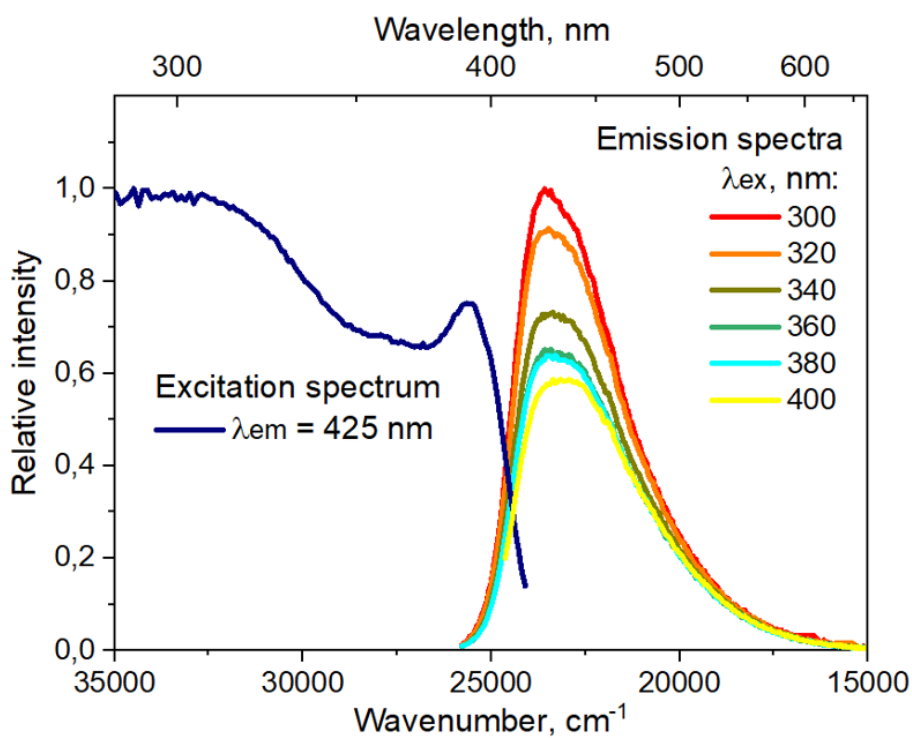

**Figure S22.** Excitation and emission spectra of  $[\text{ZnL}_2][\text{ZnCl}_2]_2 \cdot 4\text{H}_2\text{O}$  in the solid state at 300 K.

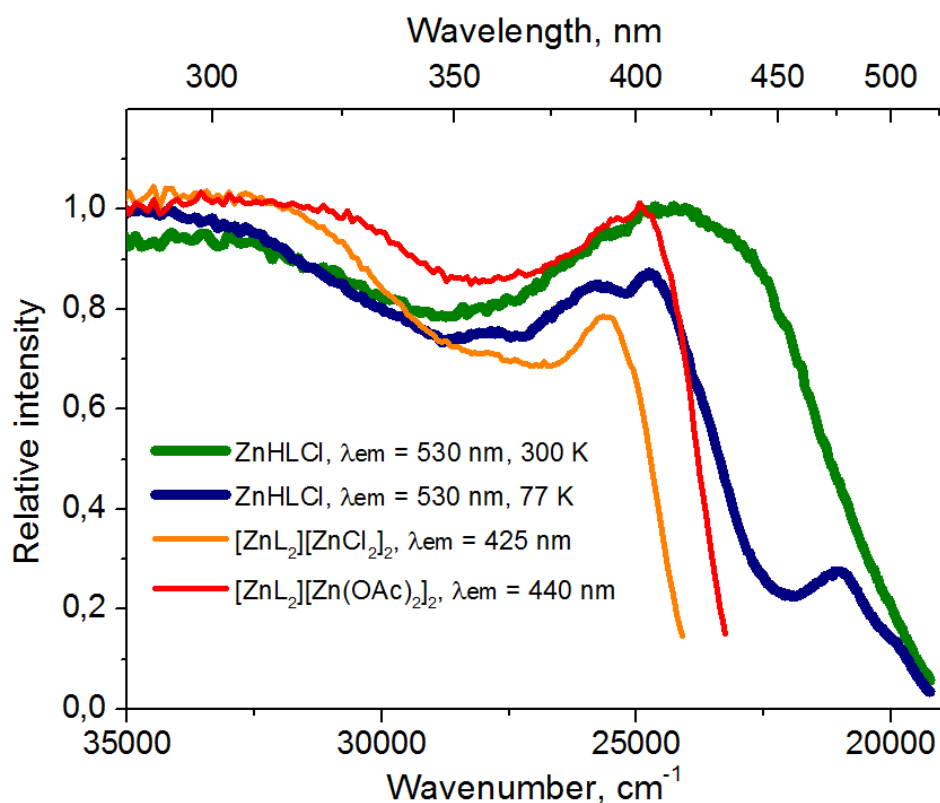

**Figure S23.** Comparison of the excitation spectra of ES IPT-capable complex  $\text{ZnHLCI}_2$  with non-ES IPT-capable complexes  $[\text{ZnL}_2][\text{ZnCl}_2]_2 \cdot 4\text{H}_2\text{O}$  and  $[\text{ZnL}_2][\text{Zn}(\text{OAc})_2]_2 \cdot 2\text{H}_2\text{O}$  in the solid state. The absence of the peak at *ca.* 470 nm in the case of compounds  $[\text{ZnL}_2][\text{ZnCl}_2]_2 \cdot 4\text{H}_2\text{O}$  and  $[\text{ZnL}_2][\text{Zn}(\text{OAc})_2]_2 \cdot 2\text{H}_2\text{O}$ , which is associated with the excitation of the proton-transferred species, supports the fact that proton transfer does not take place in  $[\text{ZnL}_2][\text{ZnCl}_2]_2 \cdot 4\text{H}_2\text{O}$  and  $[\text{ZnL}_2][\text{Zn}(\text{OAc})_2]_2 \cdot 2\text{H}_2\text{O}$ .

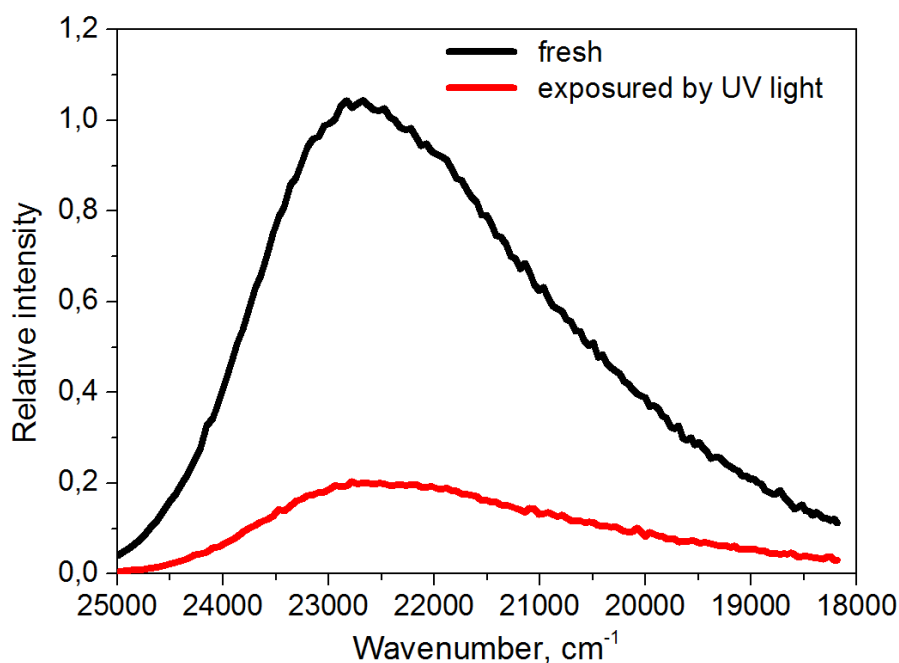

**Figure S24.** Comparison of the emission intensity of fresh and light-irradiated samples of  $[\text{ZnL}_2][\text{Zn}(\text{OAc})_2]_2 \cdot 2\text{H}_2\text{O}$ ,  $\lambda_{\text{ex}} = 300 \text{ nm}$ .



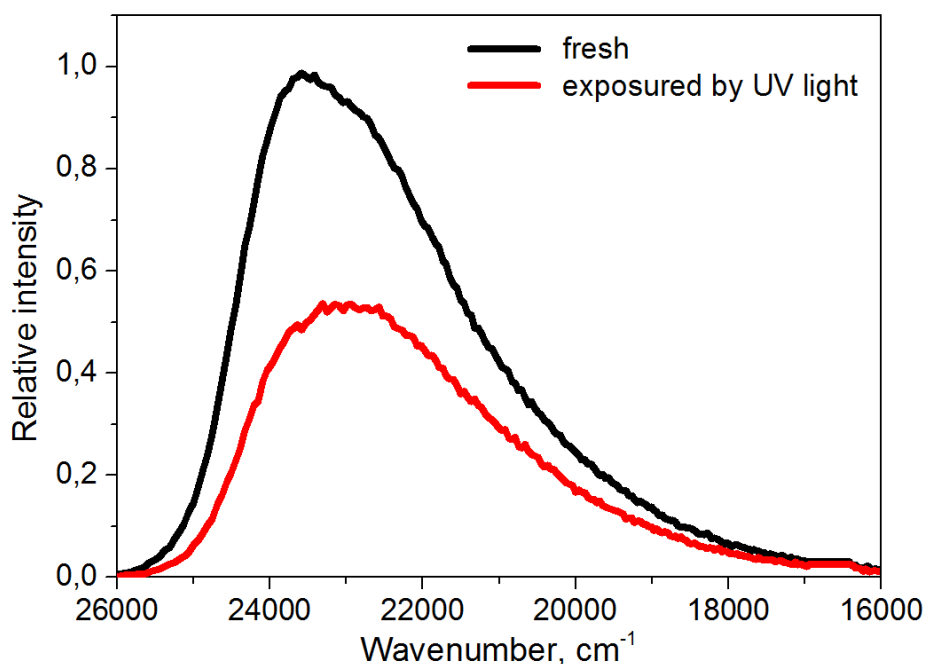

**Figure S25.** Comparison of the emission intensity of fresh and light-irradiated samples of  $[\text{ZnL}_2][\text{ZnCl}_2]_2 \cdot 4\text{H}_2\text{O}$ ,  $\lambda_{\text{ex}} = 300 \text{ nm}$ .

**Table S3.** Optimized geometry of the **ground state** of  $\text{ZnHLCl}_2$  (**normal form**,  $\text{S}_0^{\text{N}}$ ) in Cartesian (XYZ) coordinates as calculated in Gaussian at the M062X/6-31+g(d) level of theory **using the QM/MM method (QM region)**.

|    |                 |                 |                 |
|----|-----------------|-----------------|-----------------|
| Cl | 0.825694000000  | -3.862487000000 | 0.840797000000  |
| Cl | 0.860198000000  | -2.705945000000 | -3.048448000000 |
| Zn | 0.352078000000  | -2.470449000000 | -0.869659000000 |
| N  | -1.624869000000 | -1.592827000000 | -0.662082000000 |
| N  | 1.384673000000  | 1.668871000000  | -0.178751000000 |
| O  | 2.144111000000  | 2.779681000000  | 0.023539000000  |
| H  | 3.071377000000  | 2.397088000000  | 0.119494000000  |
| N  | 4.068468000000  | 1.004286000000  | 0.207530000000  |
| C  | 3.576976000000  | -1.350837000000 | 0.126029000000  |
| H  | 2.849020000000  | -2.149909000000 | 0.037855000000  |
| N  | 0.776683000000  | -0.410920000000 | -0.380077000000 |
| C  | -0.329697000000 | 0.385206000000  | -0.478963000000 |
| C  | 0.035434000000  | 1.718729000000  | -0.354596000000 |
| C  | 1.815726000000  | 0.381064000000  | -0.191224000000 |
| C  | 3.202550000000  | -0.009893000000 | 0.045135000000  |
| C  | 5.346927000000  | 0.715598000000  | 0.453611000000  |
| H  | 6.013682000000  | 1.560229000000  | 0.584438000000  |
| C  | 5.814932000000  | -0.588990000000 | 0.544366000000  |
| H  | 6.858763000000  | -0.775340000000 | 0.753585000000  |
| C  | 4.910898000000  | -1.634275000000 | 0.375487000000  |
| H  | 5.230215000000  | -2.665506000000 | 0.445290000000  |
| C  | -0.701125000000 | 3.013277000000  | -0.354351000000 |
| H  | 0.011559000000  | 3.839693000000  | -0.346729000000 |
| H  | -1.342151000000 | 3.110885000000  | 0.526794000000  |
| H  | -1.328743000000 | 3.099373000000  | -1.243589000000 |
| C  | -1.643759000000 | -0.248892000000 | -0.600794000000 |

|   |                 |                 |                 |
|---|-----------------|-----------------|-----------------|
| C | -2.848594000000 | 0.455600000000  | -0.589816000000 |
| H | -2.848913000000 | 1.535699000000  | -0.527055000000 |
| C | -4.041879000000 | -0.253150000000 | -0.634597000000 |
| H | -4.986063000000 | 0.280354000000  | -0.606044000000 |
| C | -4.012124000000 | -1.644626000000 | -0.678680000000 |
| H | -4.917926000000 | -2.237139000000 | -0.689845000000 |
| C | -2.772165000000 | -2.270699000000 | -0.688995000000 |
| H | -2.680444000000 | -3.350735000000 | -0.715506000000 |

**Table S4.** Optimized geometry of the **ground state** of **ZnHCl<sub>2</sub>** (local minimum in the **tautomeric form, S<sub>0</sub><sup>T</sup>**) in Cartesian (XYZ) coordinates as calculated in Gaussian at the M062X/6-31+g(d) level of theory **using the QM/MM method (QM region).**

|    |                 |                 |                 |
|----|-----------------|-----------------|-----------------|
| Cl | 0.775738000000  | -3.832706000000 | 0.794024000000  |
| Cl | 0.862419000000  | -2.694486000000 | -3.114866000000 |
| Zn | 0.382329000000  | -2.447386000000 | -0.939736000000 |
| N  | -1.603480000000 | -1.572254000000 | -0.713366000000 |
| N  | 1.326273000000  | 1.728743000000  | -0.076356000000 |
| O  | 2.035844000000  | 2.740983000000  | 0.284094000000  |
| H  | 3.699823000000  | 2.009251000000  | -0.012326000000 |
| N  | 4.114242000000  | 0.993751000000  | 0.006614000000  |
| C  | 3.520450000000  | -1.295739000000 | 0.338944000000  |
| H  | 2.759860000000  | -2.065108000000 | 0.409664000000  |
| N  | 0.780621000000  | -0.361776000000 | -0.448246000000 |
| C  | -0.368848000000 | 0.439095000000  | -0.538406000000 |
| C  | -0.030507000000 | 1.755365000000  | -0.344616000000 |
| C  | 1.776102000000  | 0.415323000000  | -0.155226000000 |
| C  | 3.163381000000  | 0.004422000000  | 0.101424000000  |
| C  | 5.422852000000  | 0.710120000000  | 0.283814000000  |
| H  | 6.110503000000  | 1.540189000000  | 0.256674000000  |
| C  | 5.819481000000  | -0.583381000000 | 0.510674000000  |
| H  | 6.866111000000  | -0.782962000000 | 0.689654000000  |
| C  | 4.878670000000  | -1.622750000000 | 0.506064000000  |
| H  | 5.179199000000  | -2.649790000000 | 0.635424000000  |
| C  | -0.776846000000 | 3.040965000000  | -0.302946000000 |
| H  | -0.064145000000 | 3.865705000000  | -0.242426000000 |
| H  | -1.433986000000 | 3.098076000000  | 0.569324000000  |
| H  | -1.388116000000 | 3.161186000000  | -1.198916000000 |
| C  | -1.655109000000 | -0.226084000000 | -0.660636000000 |
| C  | -2.878168000000 | 0.451907000000  | -0.640426000000 |
| H  | -2.902287000000 | 1.532407000000  | -0.587316000000 |
| C  | -4.053309000000 | -0.284402000000 | -0.663306000000 |
| H  | -5.008588000000 | 0.227819000000  | -0.629716000000 |
| C  | -3.989970000000 | -1.676222000000 | -0.696056000000 |
| H  | -4.881761000000 | -2.289741000000 | -0.696996000000 |
| C  | -2.735121000000 | -2.274573000000 | -0.717746000000 |
| H  | -2.619622000000 | -3.352583000000 | -0.741496000000 |

**Table S5.** Optimized geometry of the **first singlet excited state** of **ZnHCl<sub>2</sub>** (**normal form, S<sub>1</sub><sup>N</sup>**) in Cartesian (XYZ) coordinates as calculated in Gaussian at the M062X/6-31+g(d) level of theory **using the QM/MM method (QM region).**

|    |                |                 |                |
|----|----------------|-----------------|----------------|
| Cl | 0.765820000000 | -3.851350000000 | 0.813668000000 |
|----|----------------|-----------------|----------------|

|    |                 |                 |                 |
|----|-----------------|-----------------|-----------------|
| Cl | 0.854233000000  | -2.692747000000 | -3.054239000000 |
| Zn | 0.252724000000  | -2.466490000000 | -0.892939000000 |
| N  | -1.674414000000 | -1.516269000000 | -0.682558000000 |
| N  | 1.390276000000  | 1.706888000000  | -0.192659000000 |
| O  | 2.203396000000  | 2.759990000000  | 0.007731000000  |
| H  | 3.138708000000  | 2.287682000000  | 0.140765000000  |
| N  | 4.026478000000  | 1.038870000000  | 0.254566000000  |
| C  | 3.551372000000  | -1.357624000000 | 0.149426000000  |
| H  | 2.828048000000  | -2.160273000000 | 0.039090000000  |
| N  | 0.736563000000  | -0.409694000000 | -0.401544000000 |
| C  | -0.345017000000 | 0.418937000000  | -0.505748000000 |
| C  | 0.081778000000  | 1.787678000000  | -0.378444000000 |
| C  | 1.807769000000  | 0.361068000000  | -0.192346000000 |
| C  | 3.149936000000  | -0.003470000000 | 0.064132000000  |
| C  | 5.292041000000  | 0.747817000000  | 0.524826000000  |
| H  | 5.956474000000  | 1.591691000000  | 0.678224000000  |
| C  | 5.771260000000  | -0.559809000000 | 0.620845000000  |
| H  | 6.812718000000  | -0.732362000000 | 0.855536000000  |
| C  | 4.876382000000  | -1.625292000000 | 0.426379000000  |
| H  | 5.208838000000  | -2.651905000000 | 0.500071000000  |
| C  | -0.631836000000 | 3.086553000000  | -0.405280000000 |
| H  | 0.092991000000  | 3.901971000000  | -0.402943000000 |
| H  | -1.283663000000 | 3.195583000000  | 0.467519000000  |
| H  | -1.251898000000 | 3.153130000000  | -1.301625000000 |
| C  | -1.652699000000 | -0.141067000000 | -0.638681000000 |
| C  | -2.841323000000 | 0.611443000000  | -0.655612000000 |
| H  | -2.796976000000 | 1.692747000000  | -0.622313000000 |
| C  | -4.061975000000 | -0.038978000000 | -0.697558000000 |
| H  | -4.984848000000 | 0.529917000000  | -0.704380000000 |
| C  | -4.073766000000 | -1.445049000000 | -0.707985000000 |
| H  | -4.999167000000 | -2.006823000000 | -0.722763000000 |
| C  | -2.858958000000 | -2.125837000000 | -0.701333000000 |
| H  | -2.832856000000 | -3.211066000000 | -0.717779000000 |

**Table S6.** Optimized geometry of the **first singlet excited state** of **ZnHCl<sub>2</sub>** (**tautomeric form, S<sub>1</sub><sup>T</sup>**) in Cartesian (XYZ) coordinates as calculated in Gaussian at the M062X/6-31+g(d) level of theory **using the QM/MM method (QM region)**.

|    |                 |                 |                 |
|----|-----------------|-----------------|-----------------|
| Cl | 0.768662000000  | -3.828544000000 | 0.787461000000  |
| Cl | 0.862806000000  | -2.692947000000 | -3.124254000000 |
| Zn | 0.386721000000  | -2.444178000000 | -0.949636000000 |
| N  | -1.600364000000 | -1.569418000000 | -0.720579000000 |
| N  | 1.317994000000  | 1.737204000000  | -0.061612000000 |
| O  | 2.020436000000  | 2.735356000000  | 0.321418000000  |
| H  | 3.789668000000  | 1.953758000000  | -0.031057000000 |
| N  | 4.120842000000  | 0.992160000000  | -0.021981000000 |
| C  | 3.512448000000  | -1.287954000000 | 0.369470000000  |
| H  | 2.747191000000  | -2.053087000000 | 0.462880000000  |
| N  | 0.781259000000  | -0.354856000000 | -0.457872000000 |
| C  | -0.374381000000 | 0.446692000000  | -0.546788000000 |
| C  | -0.039863000000 | 1.760501000000  | -0.343080000000 |
| C  | 1.770508000000  | 0.420114000000  | -0.149974000000 |
| C  | 3.157854000000  | 0.006367000000  | 0.109575000000  |
| C  | 5.433762000000  | 0.709247000000  | 0.259665000000  |

|   |                 |                 |                 |
|---|-----------------|-----------------|-----------------|
| H | 6.124402000000  | 1.537229000000  | 0.209953000000  |
| C | 5.820201000000  | -0.582671000000 | 0.505971000000  |
| H | 6.867230000000  | -0.784143000000 | 0.680639000000  |
| C | 4.874129000000  | -1.621195000000 | 0.524827000000  |
| H | 5.171972000000  | -2.647641000000 | 0.662693000000  |
| C | -0.787601000000 | 3.044828000000  | -0.295492000000 |
| H | -0.074890000000 | 3.869325000000  | -0.227416000000 |
| H | -1.447042000000 | 3.096142000000  | 0.575502000000  |
| H | -1.396532000000 | 3.169914000000  | -1.192419000000 |
| C | -1.656664000000 | -0.222925000000 | -0.669073000000 |
| C | -2.882326000000 | 0.451283000000  | -0.647538000000 |
| H | -2.909843000000 | 1.531838000000  | -0.595812000000 |
| C | -4.054869000000 | -0.288958000000 | -0.667295000000 |
| H | -5.011733000000 | 0.220208000000  | -0.632995000000 |
| C | -3.986744000000 | -1.680837000000 | -0.698435000000 |
| H | -4.876520000000 | -2.297357000000 | -0.697909000000 |
| C | -2.729759000000 | -2.275227000000 | -0.721749000000 |
| H | -2.610860000000 | -3.352935000000 | -0.745100000000 |

**Table S7.** Optimized geometry of the **second singlet excited state** of **ZnHCl<sub>2</sub>** (**tautomeric form, S<sub>2</sub><sup>T</sup>**) in Cartesian (XYZ) coordinates as calculated in Gaussian at the M062X/6-31+g(d) level of theory **using the QM/MM method (QM region)**.

|    |                 |                 |                 |
|----|-----------------|-----------------|-----------------|
| Cl | 0.764481000000  | -3.865582000000 | 0.818465000000  |
| Cl | 0.853504000000  | -2.678844000000 | -3.078942000000 |
| Zn | 0.399155000000  | -2.448481000000 | -0.892521000000 |
| N  | -1.586193000000 | -1.574380000000 | -0.672761000000 |
| N  | 1.317573000000  | 1.776583000000  | -0.157395000000 |
| O  | 2.069383000000  | 2.786111000000  | 0.041026000000  |
| H  | 3.769342000000  | 1.946039000000  | 0.111197000000  |
| N  | 4.098232000000  | 0.982560000000  | 0.190765000000  |
| C  | 3.502993000000  | -1.326338000000 | 0.219365000000  |
| H  | 2.754746000000  | -2.104545000000 | 0.254385000000  |
| N  | 0.783898000000  | -0.356088000000 | -0.394721000000 |
| C  | -0.370169000000 | 0.442383000000  | -0.498928000000 |
| C  | -0.034127000000 | 1.777472000000  | -0.361160000000 |
| C  | 1.783782000000  | 0.441898000000  | -0.178948000000 |
| C  | 3.157000000000  | 0.033371000000  | 0.080046000000  |
| C  | 5.396836000000  | 0.736560000000  | 0.421716000000  |
| H  | 6.049122000000  | 1.589447000000  | 0.509160000000  |
| C  | 5.819088000000  | -0.627169000000 | 0.508470000000  |
| H  | 6.863588000000  | -0.848467000000 | 0.658570000000  |
| C  | 4.877101000000  | -1.615977000000 | 0.405755000000  |
| H  | 5.175485000000  | -2.654647000000 | 0.471964000000  |
| C  | -0.793231000000 | 3.056092000000  | -0.348163000000 |
| H  | -0.086466000000 | 3.888297000000  | -0.338187000000 |
| H  | -1.425313000000 | 3.137266000000  | 0.540824000000  |
| H  | -1.429562000000 | 3.139871000000  | -1.230564000000 |
| C  | -1.646272000000 | -0.223068000000 | -0.617609000000 |
| C  | -2.875374000000 | 0.450131000000  | -0.608361000000 |
| H  | -2.904543000000 | 1.530402000000  | -0.552407000000 |
| C  | -4.046365000000 | -0.289569000000 | -0.646487000000 |
| H  | -5.004475000000 | 0.217455000000  | -0.619314000000 |
| C  | -3.974230000000 | -1.683732000000 | -0.683162000000 |

|   |                 |                 |                 |
|---|-----------------|-----------------|-----------------|
| H | -4.863020000000 | -2.301783000000 | -0.692838000000 |
| C | -2.716095000000 | -2.277637000000 | -0.692290000000 |
| H | -2.598283000000 | -3.355681000000 | -0.715083000000 |

**Table S8.** Optimized geometry of the **ground state** of **ZnHCl<sub>2</sub>** (**minor component, S<sub>0</sub><sup>minor</sup>**) in Cartesian (XYZ) coordinates as calculated in Gaussian at the M062X/6-31+g(d) level of theory **using the QM/MM method (QM region)**.

|    |                 |                 |                 |
|----|-----------------|-----------------|-----------------|
| Cl | 0.599908000000  | -3.704082000000 | 0.684290000000  |
| Cl | 0.945568000000  | -2.668690000000 | -2.954056000000 |
| Zn | 1.615361000000  | -2.297303000000 | -0.830635000000 |
| N  | -1.649267000000 | -1.605819000000 | -0.464626000000 |
| N  | 1.352632000000  | 1.783122000000  | -0.152534000000 |
| O  | 2.065994000000  | 2.846607000000  | 0.023328000000  |
| N  | 3.385662000000  | -1.271445000000 | -0.153287000000 |
| C  | 4.218337000000  | 0.927093000000  | 0.365884000000  |
| H  | 3.980072000000  | 1.976854000000  | 0.471783000000  |
| N  | 0.813308000000  | -0.367075000000 | -0.351830000000 |
| C  | -0.319396000000 | 0.380998000000  | -0.449015000000 |
| C  | 0.001877000000  | 1.743226000000  | -0.332608000000 |
| C  | 1.811407000000  | 0.493031000000  | -0.175200000000 |
| C  | 3.185278000000  | 0.057426000000  | 0.011828000000  |
| C  | 4.602625000000  | -1.770250000000 | 0.079496000000  |
| H  | 4.713331000000  | -2.842236000000 | -0.033948000000 |
| C  | 5.682027000000  | -0.976134000000 | 0.446114000000  |
| H  | 6.649096000000  | -1.429561000000 | 0.618386000000  |
| C  | 5.485297000000  | 0.396401000000  | 0.568705000000  |
| H  | 6.311546000000  | 1.050361000000  | 0.825844000000  |
| C  | -0.773664000000 | 3.010688000000  | -0.344728000000 |
| H  | -0.056687000000 | 3.833389000000  | -0.283595000000 |
| H  | -1.457187000000 | 3.086987000000  | 0.507016000000  |
| H  | -1.355878000000 | 3.112908000000  | -1.263948000000 |
| C  | -1.600310000000 | -0.252864000000 | -0.539910000000 |
| C  | -2.829455000000 | 0.420126000000  | -0.655925000000 |
| H  | -2.834169000000 | 1.501048000000  | -0.675599000000 |
| C  | -4.007068000000 | -0.296161000000 | -0.717525000000 |
| H  | -4.949058000000 | 0.238585000000  | -0.773613000000 |
| C  | -3.993368000000 | -1.701069000000 | -0.703638000000 |
| H  | -4.900594000000 | -2.286139000000 | -0.763087000000 |
| C  | -2.777894000000 | -2.328169000000 | -0.573028000000 |
| H  | -2.639259000000 | -3.399607000000 | -0.513751000000 |
| H  | -0.798847000000 | -2.136472000000 | -0.225490000000 |

**Table S9.** Optimized geometry of the **first singlet excited state** of **ZnHCl<sub>2</sub>** (**minor component, S<sub>1</sub><sup>minor</sup>**) in Cartesian (XYZ) coordinates as calculated in Gaussian at the M062X/6-31+g(d) level of theory **using the QM/MM method (QM region)**.

|    |                 |                 |                 |
|----|-----------------|-----------------|-----------------|
| Cl | 0.757770000000  | -3.694794000000 | 0.777121000000  |
| Cl | 0.994920000000  | -2.656824000000 | -2.981516000000 |
| Zn | 1.583194000000  | -2.315583000000 | -0.840273000000 |
| N  | -1.618148000000 | -1.591515000000 | -0.450163000000 |
| N  | 1.353534000000  | 1.797367000000  | -0.171740000000 |
| O  | 2.041921000000  | 2.844722000000  | -0.015180000000 |

|   |                 |                 |                 |
|---|-----------------|-----------------|-----------------|
| N | 3.378935000000  | -1.271401000000 | -0.175356000000 |
| C | 4.248814000000  | 0.909146000000  | 0.370934000000  |
| H | 4.053563000000  | 1.962024000000  | 0.504641000000  |
| N | 0.817351000000  | -0.331832000000 | -0.353107000000 |
| C | -0.339980000000 | 0.432653000000  | -0.443240000000 |
| C | -0.029220000000 | 1.767083000000  | -0.338545000000 |
| C | 1.830609000000  | 0.495320000000  | -0.182273000000 |
| C | 3.199373000000  | 0.061230000000  | 0.002500000000  |
| C | 4.587421000000  | -1.787558000000 | 0.059597000000  |
| H | 4.682579000000  | -2.860153000000 | -0.058786000000 |
| C | 5.680266000000  | -1.015359000000 | 0.435016000000  |
| H | 6.639134000000  | -1.485115000000 | 0.607457000000  |
| C | 5.506209000000  | 0.360966000000  | 0.570570000000  |
| H | 6.340151000000  | 1.000430000000  | 0.838174000000  |
| C | -0.809000000000 | 3.030762000000  | -0.335678000000 |
| H | -0.125656000000 | 3.876536000000  | -0.241127000000 |
| H | -1.514056000000 | 3.060240000000  | 0.499503000000  |
| H | -1.375897000000 | 3.136103000000  | -1.262945000000 |
| C | -1.639742000000 | -0.212706000000 | -0.533036000000 |
| C | -2.851652000000 | 0.429110000000  | -0.662654000000 |
| H | -2.872435000000 | 1.509686000000  | -0.709934000000 |
| C | -4.047225000000 | -0.299068000000 | -0.725629000000 |
| H | -4.995338000000 | 0.217721000000  | -0.784479000000 |
| C | -3.975931000000 | -1.712204000000 | -0.714299000000 |
| H | -4.865098000000 | -2.323851000000 | -0.799143000000 |
| C | -2.760620000000 | -2.327716000000 | -0.577725000000 |
| H | -2.620947000000 | -3.398881000000 | -0.536995000000 |
| H | -0.791801000000 | -2.078595000000 | -0.101289000000 |

**Table S10.** Optimized geometry of the **ground state** of **ZnHLBr<sub>2</sub> (normal form, S<sub>0</sub><sup>N</sup>)** in Cartesian (XYZ) coordinates as calculated in Gaussian at the M062X/6-31+g(d) level of theory **using the QM/MM method (QM region).**

|    |                 |                 |                 |
|----|-----------------|-----------------|-----------------|
| Br | 0.868164000000  | -3.966194000000 | 0.909353000000  |
| Br | 0.915945000000  | -2.670581000000 | -3.162031000000 |
| Zn | 0.371061000000  | -2.429764000000 | -0.853635000000 |
| N  | -1.603133000000 | -1.551249000000 | -0.641524000000 |
| N  | 1.404422000000  | 1.705075000000  | -0.105190000000 |
| O  | 2.162676000000  | 2.814973000000  | 0.111314000000  |
| H  | 3.091717000000  | 2.435908000000  | 0.188252000000  |
| N  | 4.101874000000  | 1.034280000000  | 0.229369000000  |
| C  | 3.606965000000  | -1.317890000000 | 0.105847000000  |
| H  | 2.878671000000  | -2.114500000000 | 0.003989000000  |
| N  | 0.799248000000  | -0.371649000000 | -0.344542000000 |
| C  | -0.309792000000 | 0.424111000000  | -0.421813000000 |
| C  | 0.053447000000  | 1.755279000000  | -0.271704000000 |
| C  | 1.839045000000  | 0.418509000000  | -0.147639000000 |
| C  | 3.231671000000  | 0.024644000000  | 0.058443000000  |
| C  | 5.384136000000  | 0.737341000000  | 0.449639000000  |
| H  | 6.057684000000  | 1.576985000000  | 0.586073000000  |
| C  | 5.851109000000  | -0.570312000000 | 0.512728000000  |
| H  | 6.898555000000  | -0.762669000000 | 0.703765000000  |
| C  | 4.941955000000  | -1.611058000000 | 0.339904000000  |
| H  | 5.255832000000  | -2.646106000000 | 0.398031000000  |

|   |                 |                 |                 |
|---|-----------------|-----------------|-----------------|
| C | -0.689748000000 | 3.046087000000  | -0.242246000000 |
| H | 0.016682000000  | 3.875280000000  | -0.175787000000 |
| H | -1.360381000000 | 3.101875000000  | 0.620141000000  |
| H | -1.288730000000 | 3.167851000000  | -1.147639000000 |
| C | -1.623640000000 | -0.208959000000 | -0.557401000000 |
| C | -2.830815000000 | 0.491296000000  | -0.542943000000 |
| H | -2.834174000000 | 1.570520000000  | -0.468741000000 |
| C | -4.022642000000 | -0.219321000000 | -0.605503000000 |
| H | -4.967408000000 | 0.313066000000  | -0.577383000000 |
| C | -3.991053000000 | -1.609860000000 | -0.672941000000 |
| H | -4.896034000000 | -2.204832000000 | -0.704296000000 |
| C | -2.748592000000 | -2.231004000000 | -0.687713000000 |
| H | -2.651172000000 | -3.308927000000 | -0.735699000000 |

**Table S11.** Optimized geometry of the **ground state** of **ZnHLBr<sub>2</sub>** (local minimum in the **tautomeric form, S<sub>0</sub><sup>T</sup>**) in Cartesian (XYZ) coordinates as calculated in Gaussian at the M062X/6-31+g(d) level of theory using the QM/MM method (QM region).

|    |                 |                 |                 |
|----|-----------------|-----------------|-----------------|
| Br | 0.813652000000  | -3.956640000000 | 0.858010000000  |
| Br | 0.922866000000  | -2.652469000000 | -3.226040000000 |
| Zn | 0.406414000000  | -2.415025000000 | -0.921330000000 |
| N  | -1.572607000000 | -1.530839000000 | -0.694000000000 |
| N  | 1.371044000000  | 1.746336000000  | 0.008850000000  |
| O  | 2.087732000000  | 2.747895000000  | 0.385040000000  |
| H  | 3.758230000000  | 2.020455000000  | 0.025810000000  |
| N  | 4.166453000000  | 1.001060000000  | 0.022210000000  |
| C  | 3.564920000000  | -1.287048000000 | 0.343600000000  |
| H  | 2.800589000000  | -2.051427000000 | 0.416930000000  |
| N  | 0.818069000000  | -0.334540000000 | -0.404140000000 |
| C  | -0.330341000000 | 0.471056000000  | -0.472800000000 |
| C  | 0.011793000000  | 1.781710000000  | -0.250460000000 |
| C  | 1.818079000000  | 0.434732000000  | -0.102750000000 |
| C  | 3.210204000000  | 0.017108000000  | 0.124350000000  |
| C  | 5.479476000000  | 0.703515000000  | 0.268660000000  |
| H  | 6.175136000000  | 1.528544000000  | 0.234670000000  |
| C  | 5.870932000000  | -0.595290000000 | 0.478740000000  |
| H  | 6.920884000000  | -0.804467000000 | 0.631680000000  |
| C  | 4.921734000000  | -1.627671000000 | 0.491070000000  |
| H  | 5.211466000000  | -2.658638000000 | 0.629180000000  |
| C  | -0.734972000000 | 3.066201000000  | -0.177510000000 |
| H  | -0.025482000000 | 3.884659000000  | -0.041470000000 |
| H  | -1.432842000000 | 3.078583000000  | 0.664090000000  |
| H  | -1.304394000000 | 3.235114000000  | -1.093740000000 |
| C  | -1.619663000000 | -0.186230000000 | -0.614390000000 |
| C  | -2.842031000000 | 0.492236000000  | -0.591540000000 |
| H  | -2.864744000000 | 1.571945000000  | -0.524330000000 |
| C  | -4.018982000000 | -0.241418000000 | -0.635900000000 |
| H  | -4.973229000000 | 0.273150000000  | -0.602860000000 |
| C  | -3.959786000000 | -1.632488000000 | -0.694990000000 |
| H  | -4.853678000000 | -2.244328000000 | -0.718750000000 |
| C  | -2.705189000000 | -2.230803000000 | -0.721660000000 |
| H  | -2.588136000000 | -3.307091000000 | -0.771230000000 |

**Table S12.** Optimized geometry of the **first singlet excited state** of **ZnHLBr<sub>2</sub> (tautomeric form, S<sub>1</sub><sup>T</sup>)** in Cartesian (XYZ) coordinates as calculated in Gaussian at the M062X/6-31+g(d) level of theory **using the QM/MM method (QM region)**.

|    |                 |                 |                 |
|----|-----------------|-----------------|-----------------|
| Br | 0.805773000000  | -3.955046000000 | 0.849692000000  |
| Br | 0.923774000000  | -2.649657000000 | -3.236166000000 |
| Zn | 0.411395000000  | -2.412689000000 | -0.931986000000 |
| N  | -1.568306000000 | -1.527663000000 | -0.702476000000 |
| N  | 1.366264000000  | 1.752455000000  | 0.024155000000  |
| O  | 2.077019000000  | 2.738524000000  | 0.423162000000  |
| H  | 3.853435000000  | 1.961289000000  | 0.001625000000  |
| N  | 4.175647000000  | 0.996495000000  | -0.008371000000 |
| C  | 3.558858000000  | -1.282454000000 | 0.376578000000  |
| H  | 2.789363000000  | -2.042211000000 | 0.474943000000  |
| N  | 0.820717000000  | -0.329010000000 | -0.413641000000 |
| C  | -0.333314000000 | 0.478003000000  | -0.481065000000 |
| C  | 0.005827000000  | 1.785728000000  | -0.248407000000 |
| C  | 1.815048000000  | 0.437269000000  | -0.097322000000 |
| C  | 3.207094000000  | 0.016224000000  | 0.132785000000  |
| C  | 5.493071000000  | 0.698848000000  | 0.241824000000  |
| H  | 6.191894000000  | 1.521778000000  | 0.183490000000  |
| C  | 5.873713000000  | -0.598702000000 | 0.472901000000  |
| H  | 6.924027000000  | -0.810289000000 | 0.620401000000  |
| C  | 4.918782000000  | -1.629876000000 | 0.511679000000  |
| H  | 5.205048000000  | -2.660254000000 | 0.661220000000  |
| C  | -0.741428000000 | 3.069323000000  | -0.169247000000 |
| H  | -0.031489000000 | 3.886242000000  | -0.023262000000 |
| H  | -1.443189000000 | 3.075511000000  | 0.669384000000  |
| H  | -1.306630000000 | 3.244984000000  | -1.087024000000 |
| C  | -1.619134000000 | -0.182717000000 | -0.623516000000 |
| C  | -2.843668000000 | 0.492651000000  | -0.599460000000 |
| H  | -2.869124000000 | 1.572431000000  | -0.533257000000 |
| C  | -4.018504000000 | -0.244280000000 | -0.641221000000 |
| H  | -4.974098000000 | 0.267752000000  | -0.607485000000 |
| C  | -3.955379000000 | -1.635424000000 | -0.699122000000 |
| H  | -4.847700000000 | -2.249668000000 | -0.721795000000 |
| C  | -2.699054000000 | -2.230498000000 | -0.727488000000 |
| H  | -2.579210000000 | -3.306550000000 | -0.777286000000 |

**Table S13.** Optimized geometry of the **ground state** of **ZnHLBr<sub>2</sub> (minor component, S<sub>0</sub><sup>minor</sup>)** in Cartesian (XYZ) coordinates as calculated in Gaussian at the M062X/6-31+g(d) level of theory **using the QM/MM method (QM region)**.

|    |                 |                 |                 |
|----|-----------------|-----------------|-----------------|
| Br | 0.713992000000  | -3.802297000000 | 0.764890000000  |
| Br | 0.963526000000  | -2.641173000000 | -3.095504000000 |
| Zn | 1.676720000000  | -2.244042000000 | -0.847539000000 |
| N  | -1.607218000000 | -1.561272000000 | -0.450685000000 |
| N  | 1.386909000000  | 1.831301000000  | -0.100001000000 |
| O  | 2.096366000000  | 2.897417000000  | 0.081530000000  |
| N  | 3.446331000000  | -1.201941000000 | -0.216314000000 |
| C  | 4.267714000000  | 0.986171000000  | 0.352952000000  |
| H  | 4.020018000000  | 2.028587000000  | 0.501841000000  |
| N  | 0.857694000000  | -0.319263000000 | -0.334030000000 |



|   |                 |                 |                 |
|---|-----------------|-----------------|-----------------|
| C | -0.280234000000 | 0.426023000000  | -0.408713000000 |
| C | 0.035044000000  | 1.786981000000  | -0.268654000000 |
| C | 1.852415000000  | 0.544183000000  | -0.150114000000 |
| C | 3.235293000000  | 0.117977000000  | -0.005283000000 |
| C | 4.672643000000  | -1.697228000000 | -0.032121000000 |
| H | 4.786681000000  | -2.764438000000 | -0.189206000000 |
| C | 5.752659000000  | -0.903812000000 | 0.336681000000  |
| H | 6.729029000000  | -1.351281000000 | 0.472682000000  |
| C | 5.544588000000  | 0.461971000000  | 0.510580000000  |
| H | 6.370098000000  | 1.115517000000  | 0.774600000000  |
| C | -0.747072000000 | 3.050635000000  | -0.257022000000 |
| H | -0.034367000000 | 3.874229000000  | -0.164562000000 |
| H | -1.442836000000 | 3.099602000000  | 0.586557000000  |
| H | -1.315833000000 | 3.176611000000  | -1.182351000000 |
| C | -1.560425000000 | -0.207864000000 | -0.507893000000 |
| C | -2.792005000000 | 0.461346000000  | -0.617389000000 |
| H | -2.799924000000 | 1.542271000000  | -0.627987000000 |
| C | -3.967511000000 | -0.258128000000 | -0.689196000000 |
| H | -4.910474000000 | 0.275147000000  | -0.745882000000 |
| C | -3.951439000000 | -1.663147000000 | -0.686588000000 |
| H | -4.858223000000 | -2.250372000000 | -0.752034000000 |
| C | -2.733499000000 | -2.286550000000 | -0.560924000000 |
| H | -2.588480000000 | -3.357037000000 | -0.509316000000 |
| H | -0.752206000000 | -2.089079000000 | -0.228403000000 |

**Table S14.** Optimized geometry of the **first singlet excited state** of **ZnHLBr<sub>2</sub>** (**minor component, S<sub>1</sub><sup>minor</sup>**) in Cartesian (XYZ) coordinates as calculated in Gaussian at the M062X/6-31+g(d) level of theory **using the QM/MM method (QM region).**

|    |                 |                 |                 |
|----|-----------------|-----------------|-----------------|
| Br | 0.886794000000  | -3.780615000000 | 0.857337000000  |
| Br | 1.014114000000  | -2.628138000000 | -3.125610000000 |
| Zn | 1.645494000000  | -2.261271000000 | -0.861017000000 |
| N  | -1.575946000000 | -1.547547000000 | -0.434130000000 |
| N  | 1.386523000000  | 1.848266000000  | -0.119157000000 |
| O  | 2.070347000000  | 2.898591000000  | 0.040765000000  |
| N  | 3.437138000000  | -1.199352000000 | -0.243888000000 |
| C  | 4.297411000000  | 0.966664000000  | 0.361439000000  |
| H  | 4.093677000000  | 2.010789000000  | 0.543022000000  |
| N  | 0.860691000000  | -0.281866000000 | -0.334850000000 |
| C  | -0.302092000000 | 0.478767000000  | -0.401708000000 |
| C  | 0.002173000000  | 1.812409000000  | -0.272669000000 |
| C  | 1.870720000000  | 0.549164000000  | -0.158522000000 |
| C  | 3.247857000000  | 0.123285000000  | -0.015786000000 |
| C  | 4.653958000000  | -1.714940000000 | -0.057638000000 |
| H  | 4.750418000000  | -2.782362000000 | -0.223779000000 |
| C  | 5.747900000000  | -0.946325000000 | 0.324134000000  |
| H  | 6.715747000000  | -1.411109000000 | 0.460915000000  |
| C  | 5.563807000000  | 0.422459000000  | 0.515520000000  |
| H  | 6.397502000000  | 1.059052000000  | 0.793876000000  |
| C  | -0.784185000000 | 3.071931000000  | -0.247535000000 |
| H  | -0.105615000000 | 3.917743000000  | -0.121937000000 |
| H  | -1.500957000000 | 3.075233000000  | 0.578066000000  |
| H  | -1.337786000000 | 3.200341000000  | -1.180638000000 |

|   |                 |                 |                 |
|---|-----------------|-----------------|-----------------|
| C | -1.600895000000 | -0.168234000000 | -0.501148000000 |
| C | -2.815267000000 | 0.468959000000  | -0.627516000000 |
| H | -2.839770000000 | 1.549754000000  | -0.665829000000 |
| C | -4.008268000000 | -0.263054000000 | -0.701003000000 |
| H | -4.957307000000 | 0.251592000000  | -0.765153000000 |
| C | -3.933865000000 | -1.676032000000 | -0.697018000000 |
| H | -4.822472000000 | -2.289969000000 | -0.785886000000 |
| C | -2.716231000000 | -2.287165000000 | -0.561770000000 |
| H | -2.570400000000 | -3.357087000000 | -0.524742000000 |
| H | -0.744361000000 | -2.032821000000 | -0.098381000000 |

**Table S15.** Optimized geometry of the **ground state** of **ZnHLL<sub>2</sub>** (**normal form, S<sub>0</sub><sup>N</sup>**) in Cartesian (XYZ) coordinates as calculated in Gaussian at the M062X/6-31+g(d) level of theory **using the QM/MM method (QM region)**.

|    |                 |                 |                 |
|----|-----------------|-----------------|-----------------|
| I  | -0.831065000000 | -4.189703000000 | -1.018188000000 |
| I  | -0.929714000000 | -2.675743000000 | 3.336445000000  |
| Zn | -0.355745000000 | -2.415383000000 | 0.819960000000  |
| N  | 1.593346000000  | -1.502155000000 | 0.599297000000  |
| N  | -1.482091000000 | 1.688156000000  | 0.045053000000  |
| O  | -2.267757000000 | 2.783996000000  | -0.145718000000 |
| H  | -3.195342000000 | 2.394032000000  | -0.149824000000 |
| N  | -4.186357000000 | 0.972260000000  | -0.124531000000 |
| C  | -3.645363000000 | -1.370100000000 | -0.034898000000 |
| H  | -2.899436000000 | -2.154593000000 | 0.017065000000  |
| N  | -0.832035000000 | -0.375567000000 | 0.281323000000  |
| C  | 0.264203000000  | 0.442101000000  | 0.326987000000  |
| C  | -0.127903000000 | 1.764872000000  | 0.177423000000  |
| C  | -1.892123000000 | 0.394607000000  | 0.108125000000  |
| C  | -3.288766000000 | -0.022096000000 | -0.015257000000 |
| C  | -5.476398000000 | 0.652465000000  | -0.247995000000 |
| H  | -6.173700000000 | 1.480020000000  | -0.328224000000 |
| C  | -5.925983000000 | -0.663155000000 | -0.271997000000 |
| H  | -6.983540000000 | -0.873392000000 | -0.370120000000 |
| C  | -4.988754000000 | -1.687979000000 | -0.168342000000 |
| H  | -5.286817000000 | -2.729315000000 | -0.199450000000 |
| C  | 0.589168000000  | 3.070673000000  | 0.135943000000  |
| H  | 1.228498000000  | 3.149086000000  | -0.748338000000 |
| H  | 1.215304000000  | 3.197210000000  | 1.022732000000  |
| H  | -0.135697000000 | 3.885855000000  | 0.103204000000  |
| C  | 1.591104000000  | -0.163829000000 | 0.466118000000  |
| C  | 2.787685000000  | 0.553041000000  | 0.420146000000  |
| H  | 2.773015000000  | 1.628143000000  | 0.301453000000  |
| C  | 3.990811000000  | -0.137097000000 | 0.506425000000  |
| H  | 4.928659000000  | 0.405642000000  | 0.450401000000  |
| C  | 3.981008000000  | -1.523921000000 | 0.631028000000  |
| H  | 4.895396000000  | -2.103646000000 | 0.678563000000  |
| C  | 2.748528000000  | -2.162833000000 | 0.672745000000  |
| H  | 2.666196000000  | -3.239474000000 | 0.761209000000  |

**Table S16.** Optimized geometry of the **ground state** of **ZnHLL<sub>2</sub>** (local minimum in the **tautomeric form, S<sub>0</sub><sup>T</sup>**) in Cartesian (XYZ) coordinates as calculated in Gaussian at the M062X/6-31+g(d) level of theory **using the QM/MM method (QM region)**.

|    |                 |                 |                 |
|----|-----------------|-----------------|-----------------|
| I  | -0.756456000000 | -4.187570000000 | -0.966630000000 |
| I  | -0.927218000000 | -2.656003000000 | 3.398490000000  |
| Zn | -0.386336000000 | -2.404193000000 | 0.884650000000  |
| N  | 1.567887000000  | -1.484030000000 | 0.653290000000  |
| N  | -1.453148000000 | 1.725299000000  | -0.068110000000 |
| O  | -2.199590000000 | 2.710184000000  | -0.423740000000 |
| H  | -3.867855000000 | 1.958993000000  | 0.046190000000  |
| N  | -4.238061000000 | 0.942576000000  | 0.073630000000  |
| C  | -3.626334000000 | -1.340540000000 | -0.261510000000 |
| H  | -2.858718000000 | -2.095914000000 | -0.378400000000 |
| N  | -0.851077000000 | -0.342687000000 | 0.344860000000  |
| C  | 0.285023000000  | 0.486196000000  | 0.381810000000  |
| C  | -0.087752000000 | 1.787769000000  | 0.158070000000  |
| C  | -1.874081000000 | 0.406378000000  | 0.066810000000  |
| C  | -3.272089000000 | -0.029364000000 | -0.081200000000 |
| C  | -5.560897000000 | 0.620959000000  | -0.072750000000 |
| H  | -6.264987000000 | 1.436777000000  | 0.008470000000  |
| C  | -5.947641000000 | -0.686379000000 | -0.233480000000 |
| H  | -7.004895000000 | -0.913247000000 | -0.285630000000 |
| C  | -4.983967000000 | -1.705579000000 | -0.309400000000 |
| H  | -5.263331000000 | -2.743909000000 | -0.420650000000 |
| C  | 0.628653000000  | 3.089631000000  | 0.078750000000  |
| H  | 1.297980000000  | 3.131140000000  | -0.785190000000 |
| H  | 1.222460000000  | 3.260705000000  | 0.979930000000  |
| H  | -0.103886000000 | 3.893078000000  | -0.020970000000 |
| C  | 1.588669000000  | -0.142499000000 | 0.526550000000  |
| C  | 2.799358000000  | 0.555380000000  | 0.470250000000  |
| H  | 2.801409000000  | 1.631680000000  | 0.359300000000  |
| C  | 3.989710000000  | -0.156013000000 | 0.533740000000  |
| H  | 4.936151000000  | 0.370426000000  | 0.467800000000  |
| C  | 3.955681000000  | -1.544466000000 | 0.648660000000  |
| H  | 4.860585000000  | -2.140070000000 | 0.680500000000  |
| C  | 2.712246000000  | -2.163087000000 | 0.704600000000  |
| H  | 2.612795000000  | -3.239144000000 | 0.788810000000  |

**Table S17.** Optimized geometry of the **first singlet excited state** of ZnHLI<sub>2</sub> (tautomeric form, S<sub>1</sub><sup>T</sup>) in Cartesian (XYZ) coordinates as calculated in Gaussian at the M062X/6-31+g(d) level of theory **using the QM/MM method (QM region).**

|    |                 |                 |                 |
|----|-----------------|-----------------|-----------------|
| I  | -0.747937000000 | -4.187458000000 | -0.959594000000 |
| I  | -0.926527000000 | -2.652996000000 | 3.406523000000  |
| Zn | -0.389241000000 | -2.403074000000 | 0.892883000000  |
| N  | 1.565540000000  | -1.482137000000 | 0.659682000000  |
| N  | -1.449229000000 | 1.729579000000  | -0.079486000000 |
| O  | -2.191143000000 | 2.702221000000  | -0.453797000000 |
| H  | -3.941540000000 | 1.911176000000  | 0.068060000000  |
| N  | -4.243205000000 | 0.939909000000  | 0.096833000000  |
| C  | -3.624125000000 | -1.336989000000 | -0.284960000000 |
| H  | -2.854376000000 | -2.089531000000 | -0.420244000000 |
| N  | -0.852829000000 | -0.338941000000 | 0.352969000000  |
| C  | 0.287673000000  | 0.490922000000  | 0.388926000000  |
| C  | -0.082785000000 | 1.790321000000  | 0.157402000000  |
| C  | -1.871740000000 | 0.407891000000  | 0.063606000000  |

|   |                 |                 |                 |
|---|-----------------|-----------------|-----------------|
| C | -3.269786000000 | -0.029884000000 | -0.087050000000 |
| C | -5.569630000000 | 0.618286000000  | -0.052014000000 |
| H | -6.274197000000 | 1.433005000000  | 0.047664000000  |
| C | -5.949791000000 | -0.688040000000 | -0.227888000000 |
| H | -7.007040000000 | -0.916628000000 | -0.274867000000 |
| C | -4.983348000000 | -1.706740000000 | -0.323606000000 |
| H | -5.260927000000 | -2.744640000000 | -0.444052000000 |
| C | 0.633875000000  | 3.091613000000  | 0.073747000000  |
| H | 1.308788000000  | 3.127580000000  | -0.786212000000 |
| H | 1.221771000000  | 3.269075000000  | 0.977766000000  |
| H | -0.099168000000 | 3.893645000000  | -0.036563000000 |
| C | 1.588733000000  | -0.140138000000 | 0.534310000000  |
| C | 2.800945000000  | 0.555747000000  | 0.477462000000  |
| H | 2.804812000000  | 1.632258000000  | 0.367984000000  |
| C | 3.989946000000  | -0.157890000000 | 0.538316000000  |
| H | 4.937279000000  | 0.366912000000  | 0.471757000000  |
| C | 3.953375000000  | -1.546591000000 | 0.651520000000  |
| H | 4.857279000000  | -2.143859000000 | 0.681652000000  |
| C | 2.708766000000  | -2.163085000000 | 0.708513000000  |
| H | 2.607507000000  | -3.239136000000 | 0.791726000000  |

**Table S18.** Optimized geometry of the **ground state** of **ZnHII<sub>2</sub> (minor component, S<sub>0</sub><sup>minor</sup>)** in Cartesian (XYZ) coordinates as calculated in Gaussian at the M062X/6-31+g(d) level of theory **using the QM/MM method (QM region).**

|    |                 |                 |                 |
|----|-----------------|-----------------|-----------------|
| I  | -0.768892000000 | -4.032322000000 | -0.939552000000 |
| I  | -0.900065000000 | -2.660589000000 | 3.247742000000  |
| Zn | -1.689141000000 | -2.257473000000 | 0.798440000000  |
| N  | 1.592148000000  | -1.513659000000 | 0.372194000000  |
| N  | -1.469620000000 | 1.822556000000  | 0.029044000000  |
| O  | -2.199526000000 | 2.877242000000  | -0.137060000000 |
| N  | -3.480628000000 | -1.237325000000 | 0.235783000000  |
| C  | -4.366382000000 | 0.938782000000  | -0.268939000000 |
| H  | -4.149917000000 | 1.988483000000  | -0.415933000000 |
| N  | -0.901918000000 | -0.319679000000 | 0.262003000000  |
| C  | 0.226472000000  | 0.445580000000  | 0.307049000000  |
| C  | -0.113141000000 | 1.800054000000  | 0.165383000000  |
| C  | -1.915091000000 | 0.528946000000  | 0.099089000000  |
| C  | -3.299828000000 | 0.086346000000  | 0.022354000000  |
| C  | -4.704880000000 | -1.756902000000 | 0.115994000000  |
| H  | -4.787154000000 | -2.827857000000 | 0.276581000000  |
| C  | -5.815927000000 | -0.980926000000 | -0.194014000000 |
| H  | -6.791733000000 | -1.442166000000 | -0.285123000000 |
| C  | -5.639555000000 | 0.389652000000  | -0.367496000000 |
| H  | -6.489063000000 | 1.029338000000  | -0.587426000000 |
| C  | 0.649970000000  | 3.075824000000  | 0.132945000000  |
| H  | 1.350206000000  | 3.118591000000  | -0.707440000000 |
| H  | 1.211003000000  | 3.231584000000  | 1.059443000000  |
| H  | -0.075245000000 | 3.886092000000  | 0.021993000000  |
| C  | 1.519674000000  | -0.160936000000 | 0.412018000000  |
| C  | 2.740004000000  | 0.529369000000  | 0.521306000000  |
| H  | 2.730644000000  | 1.610450000000  | 0.516815000000  |
| C  | 3.926306000000  | -0.170595000000 | 0.616970000000  |

|   |                |                 |                |
|---|----------------|-----------------|----------------|
| H | 4.861515000000 | 0.376964000000  | 0.672469000000 |
| C | 3.933456000000 | -1.575590000000 | 0.637385000000 |
| H | 4.849956000000 | -2.146362000000 | 0.716820000000 |
| C | 2.727415000000 | -2.220350000000 | 0.506388000000 |
| H | 2.595498000000 | -3.293029000000 | 0.468471000000 |
| H | 0.748158000000 | -2.055261000000 | 0.152084000000 |

**Table S19.** Optimized geometry of the **first singlet excited state** of **ZnHLI<sub>2</sub>** (**minor component, S<sub>1</sub><sup>minor</sup>**) in Cartesian (XYZ) coordinates as calculated in Gaussian at the M062X/6-31+g(d) level of theory **using the QM/MM method (QM region)**.

|    |                 |                 |                 |
|----|-----------------|-----------------|-----------------|
| I  | -0.900558000000 | -4.022685000000 | -0.990893000000 |
| I  | -0.981731000000 | -2.633426000000 | 3.289991000000  |
| Zn | -1.653164000000 | -2.269754000000 | 0.814181000000  |
| N  | 1.555306000000  | -1.498776000000 | 0.353809000000  |
| N  | -1.468542000000 | 1.842442000000  | 0.046129000000  |
| O  | -2.173129000000 | 2.880785000000  | -0.105270000000 |
| N  | -3.464488000000 | -1.237371000000 | 0.252159000000  |
| C  | -4.396572000000 | 0.918516000000  | -0.268813000000 |
| H  | -4.227648000000 | 1.971565000000  | -0.434336000000 |
| N  | -0.904057000000 | -0.278850000000 | 0.261757000000  |
| C  | 0.248428000000  | 0.503126000000  | 0.301789000000  |
| C  | -0.080762000000 | 1.830656000000  | 0.167072000000  |
| C  | -1.932463000000 | 0.536446000000  | 0.108017000000  |
| C  | -3.309708000000 | 0.090882000000  | 0.031412000000  |
| C  | -4.678726000000 | -1.778324000000 | 0.129862000000  |
| H  | -4.740156000000 | -2.850392000000 | 0.292988000000  |
| C  | -5.805738000000 | -1.027137000000 | -0.185754000000 |
| H  | -6.772261000000 | -1.506422000000 | -0.278858000000 |
| C  | -5.657360000000 | 0.347942000000  | -0.366479000000 |
| H  | -6.517107000000 | 0.970778000000  | -0.593839000000 |
| C  | 0.686274000000  | 3.102448000000  | 0.122385000000  |
| H  | 1.408255000000  | 3.101363000000  | -0.699060000000 |
| H  | 1.232127000000  | 3.259732000000  | 1.056699000000  |
| H  | -0.004822000000 | 3.935041000000  | -0.022184000000 |
| C  | 1.558658000000  | -0.118270000000 | 0.402006000000  |
| C  | 2.765701000000  | 0.535926000000  | 0.529173000000  |
| H  | 2.776615000000  | 1.617570000000  | 0.553355000000  |
| C  | 3.965645000000  | -0.180828000000 | 0.626504000000  |
| H  | 4.909908000000  | 0.344006000000  | 0.687838000000  |
| C  | 3.910078000000  | -1.595238000000 | 0.644228000000  |
| H  | 4.806968000000  | -2.195593000000 | 0.744844000000  |
| C  | 2.701910000000  | -2.222990000000 | 0.502897000000  |
| H  | 2.565117000000  | -3.294454000000 | 0.475676000000  |
| H  | 0.735174000000  | -1.997208000000 | 0.011720000000  |

**Table S20.** Optimized geometries of the ground and excited states of **ZnHLCI<sub>2</sub>**. Dihedral angles between the planes of aromatic heterocycles are shown for both major and minor components. In the case of the major component, O...H and O...N distances are also shown.

| Normal form of the major component,<br>ground state (S <sub>0</sub> <sup>N</sup> ) | Tautomeric form of the major component,<br>ground state (S <sub>0</sub> <sup>T</sup> ) |
|------------------------------------------------------------------------------------|----------------------------------------------------------------------------------------|
|------------------------------------------------------------------------------------|----------------------------------------------------------------------------------------|

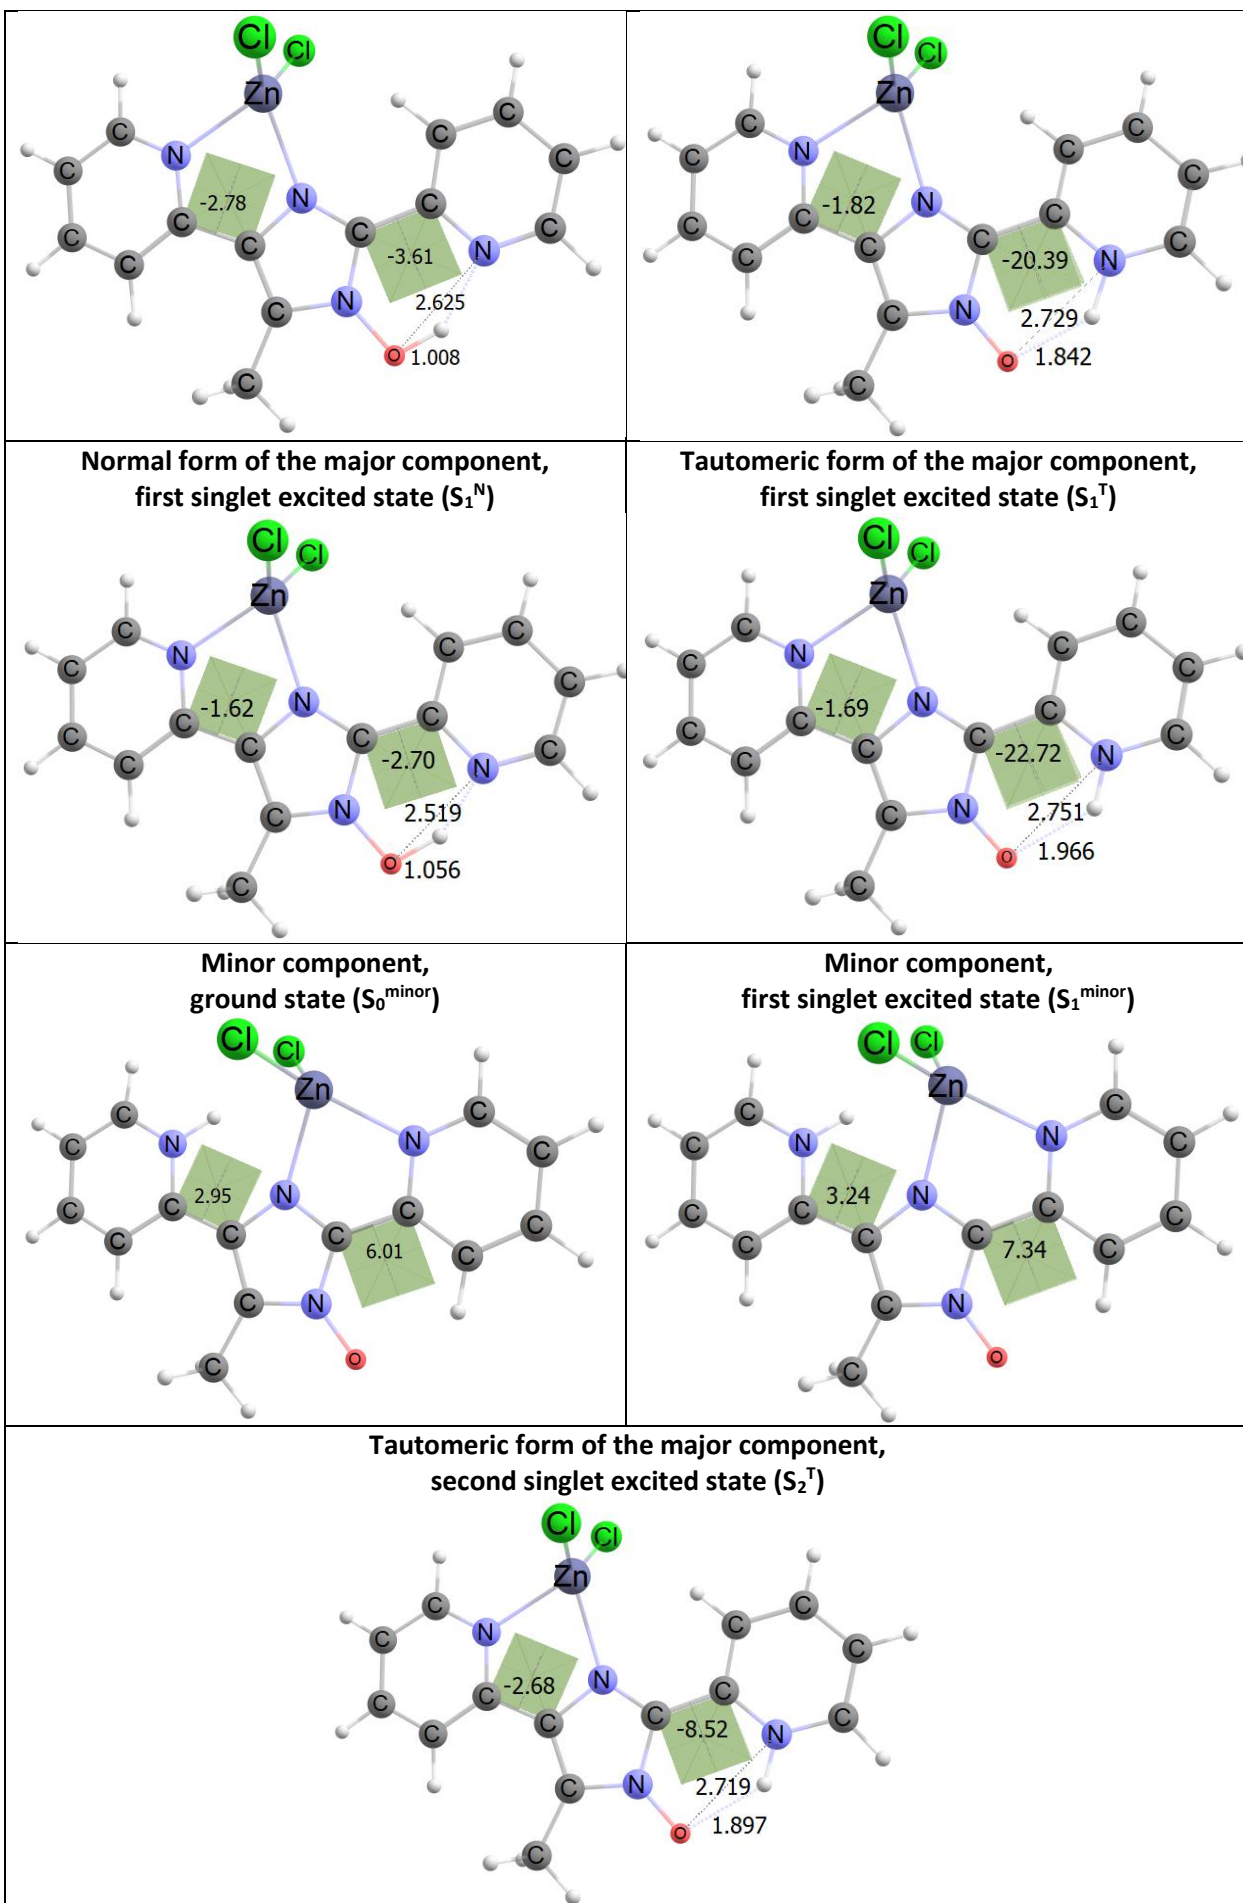

**Table S21.** Optimized geometries of the ground and excited states of **ZnHLBr<sub>2</sub>**. Dihedral angles between the planes of aromatic heterocycles are shown for both major and minor components. In the case of the major component, O...H and O...N distances are also shown.

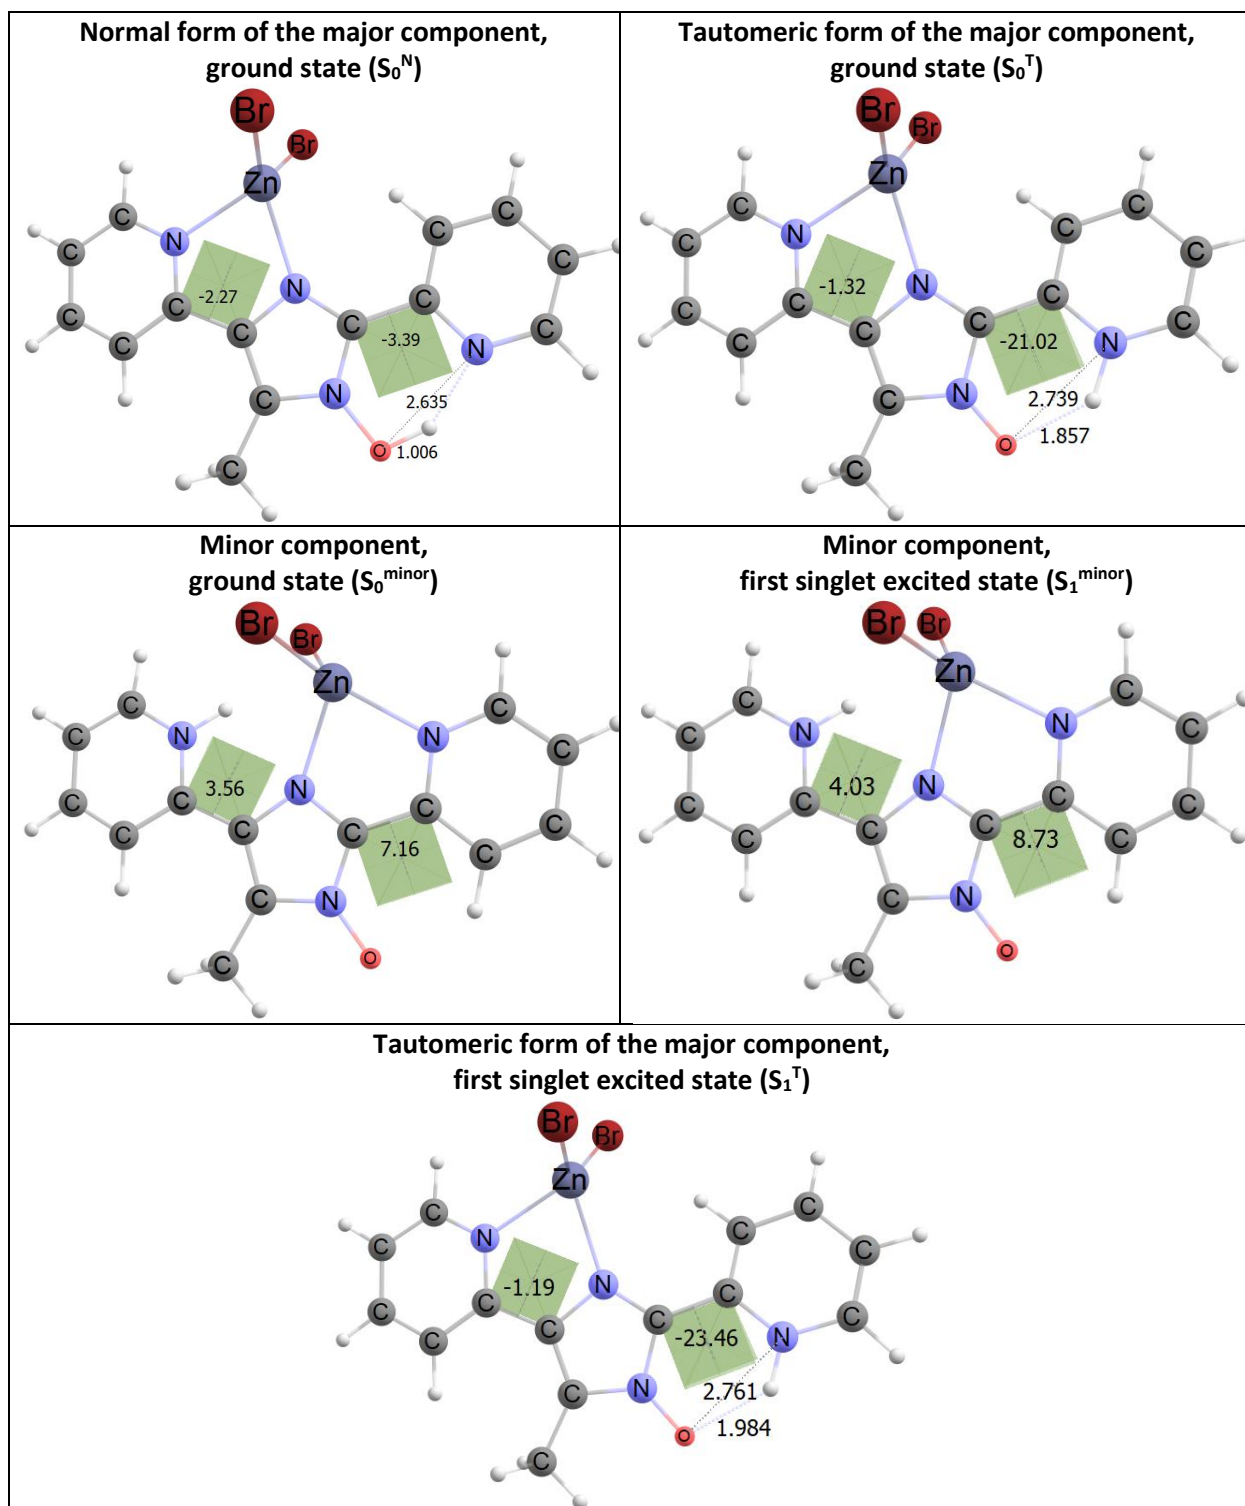

**Table S22.** Optimized geometries of the ground and excited states of **ZnHLI<sub>2</sub>**. Dihedral angles between the planes of aromatic heterocycles are shown for both major and minor components. In the case of the major component, O...H and O...N distances are also shown.

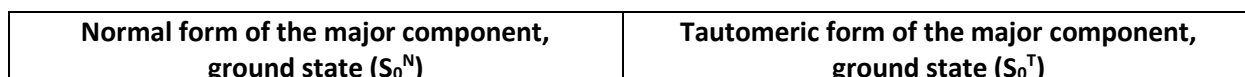

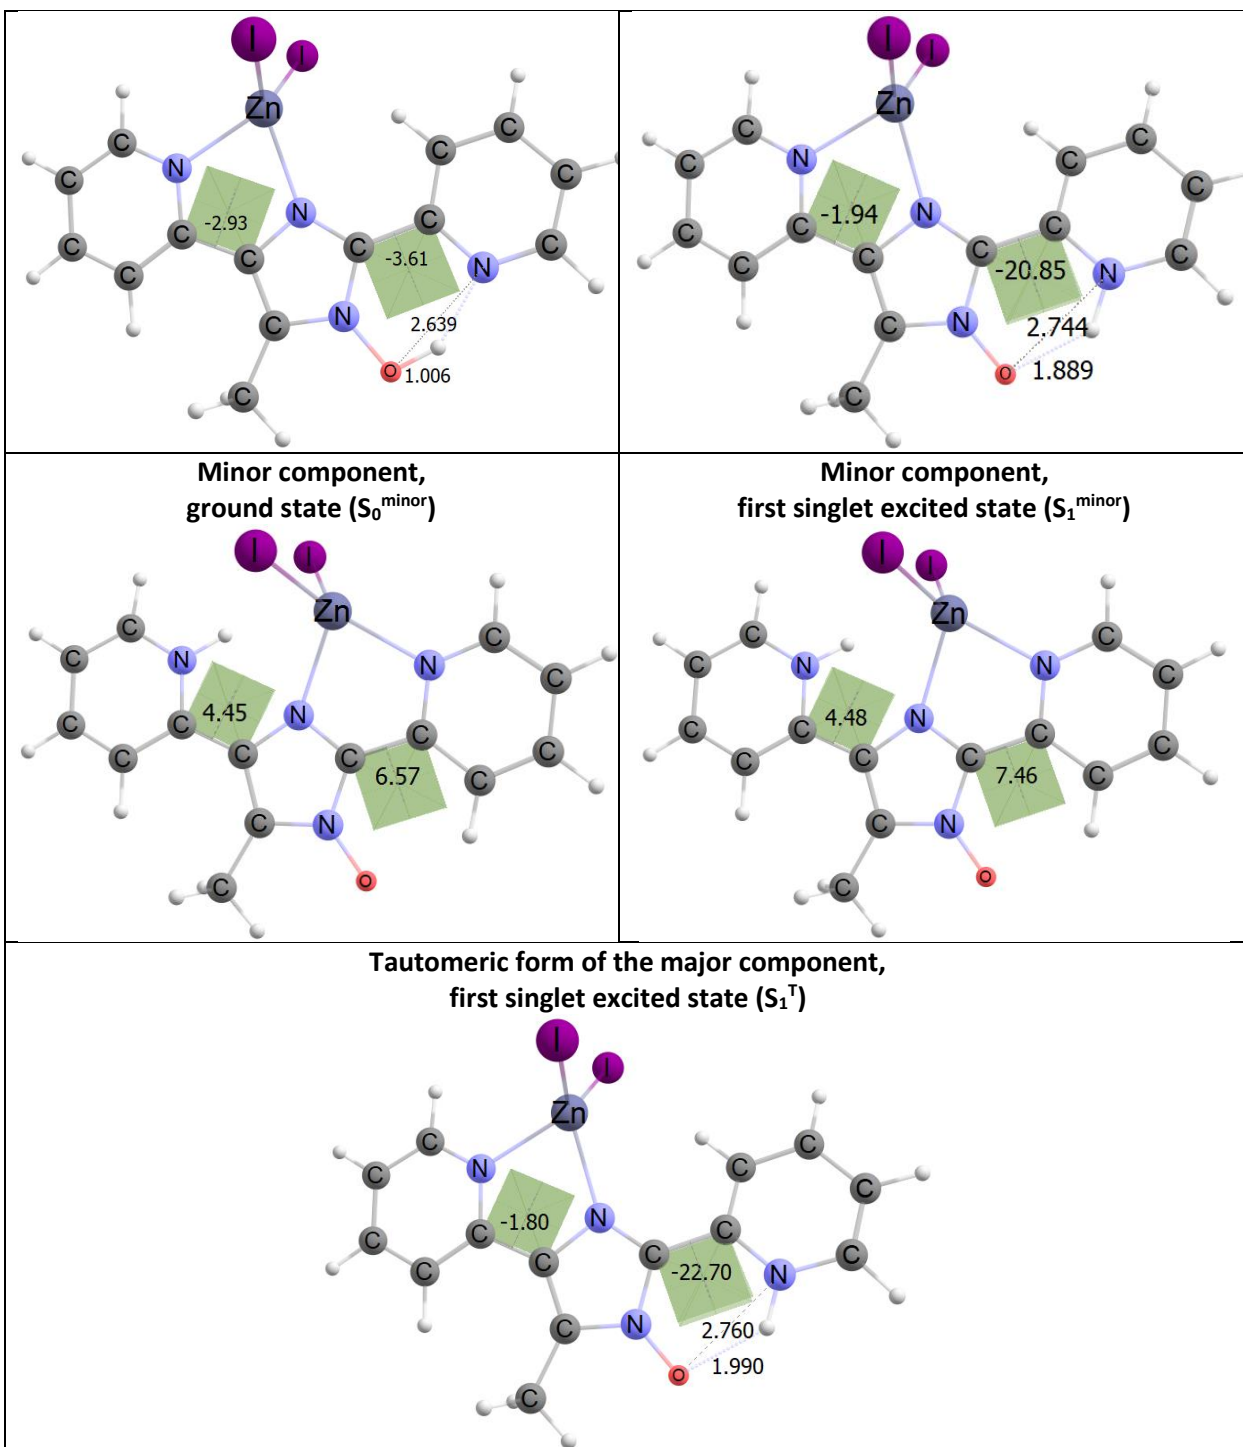



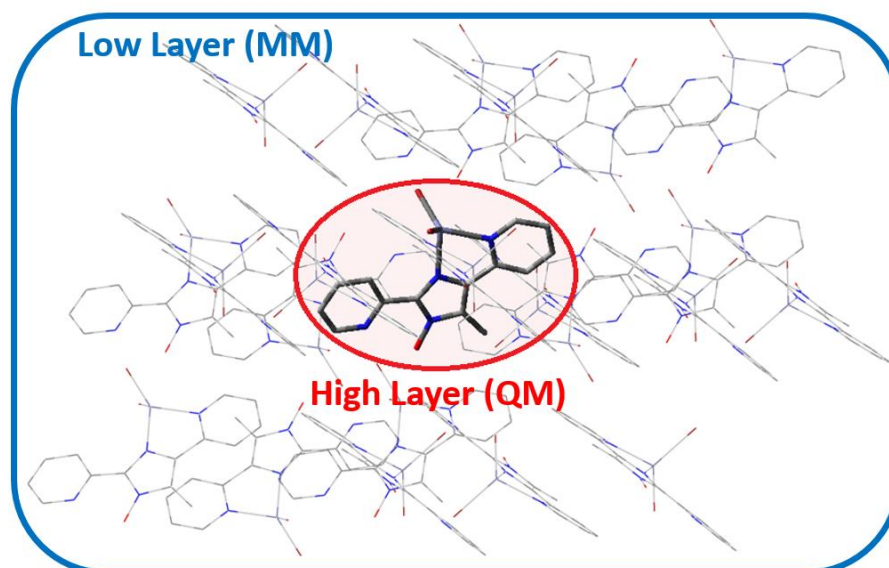

**Figure S26.** ONIOM model for the quantum chemical calculations of  $\text{ZnHLBr}_2$ .

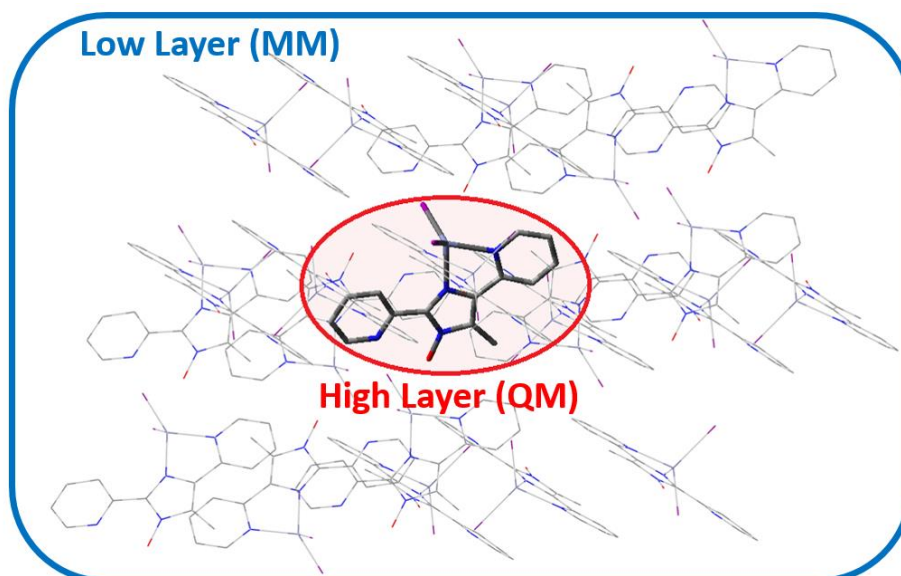

**Figure S27.** ONIOM model for the quantum chemical calculations of  $\text{ZnHLI}_2$ .

**Table S23.** Excited state properties of  $\text{ZnHLCl}_2$  at the relaxed ground state geometry (**normal form**,  $S_0^N$ , M062X/6-31+g(d) level of theory). Transitions with contribution >10% are shown.

| State | Energy (eV) | Energy (nm) | Contributions (%)                                                      | Oscillator strength | Character |
|-------|-------------|-------------|------------------------------------------------------------------------|---------------------|-----------|
| S1    | 4.2887      | 289         | HOMO $\rightarrow$ LUMO (94.5%)                                        | 0.6168              | IL        |
| S2    | 4.8362      | 256         | HOMO $\rightarrow$ LUMO+1 (81.6%)                                      | 0.1106              | IL        |
| S3    | 5.0363      | 246         | HOMO-1 $\rightarrow$ LUMO (82.9%)                                      | 0.0064              | XLCT      |
| S4    | 5.0856      | 244         | HOMO-2 $\rightarrow$ LUMO (53.8%)<br>HOMO $\rightarrow$ LUMO+2 (26.8%) | 0.0117              | XLCT + IL |
| S5    | 5.1193      | 242         | HOMO-2 $\rightarrow$ LUMO (25.5%)<br>HOMO $\rightarrow$ LUMO+2 (55.5%) | 0.0707              | IL + XLCT |
| S6    | 5.2149      | 238         | HOMO-3 $\rightarrow$ LUMO (62.8%)                                      | 0.0073              | XLCT      |
| S7    | 5.2953      | 234         | HOMO $\rightarrow$ LUMO+3 (70.6%)                                      | 0.0747              | IL        |

|    |        |     |                                                |        |      |
|----|--------|-----|------------------------------------------------|--------|------|
| S8 | 5.3281 | 233 | HOMO-4 → LUMO (55.3%)<br>HOMO-3 → LUMO (15.5%) | 0.0084 | XLCT |
|----|--------|-----|------------------------------------------------|--------|------|

**Table S24.** Isosurface contour plots of the molecular orbitals of **ZnHLCI<sub>2</sub>** at the ground state geometry (**normal form, S<sub>0</sub><sup>N</sup>**, M062X/6-31+g(d) level of theory). Orbital decomposition resulting from Mulliken population analysis.

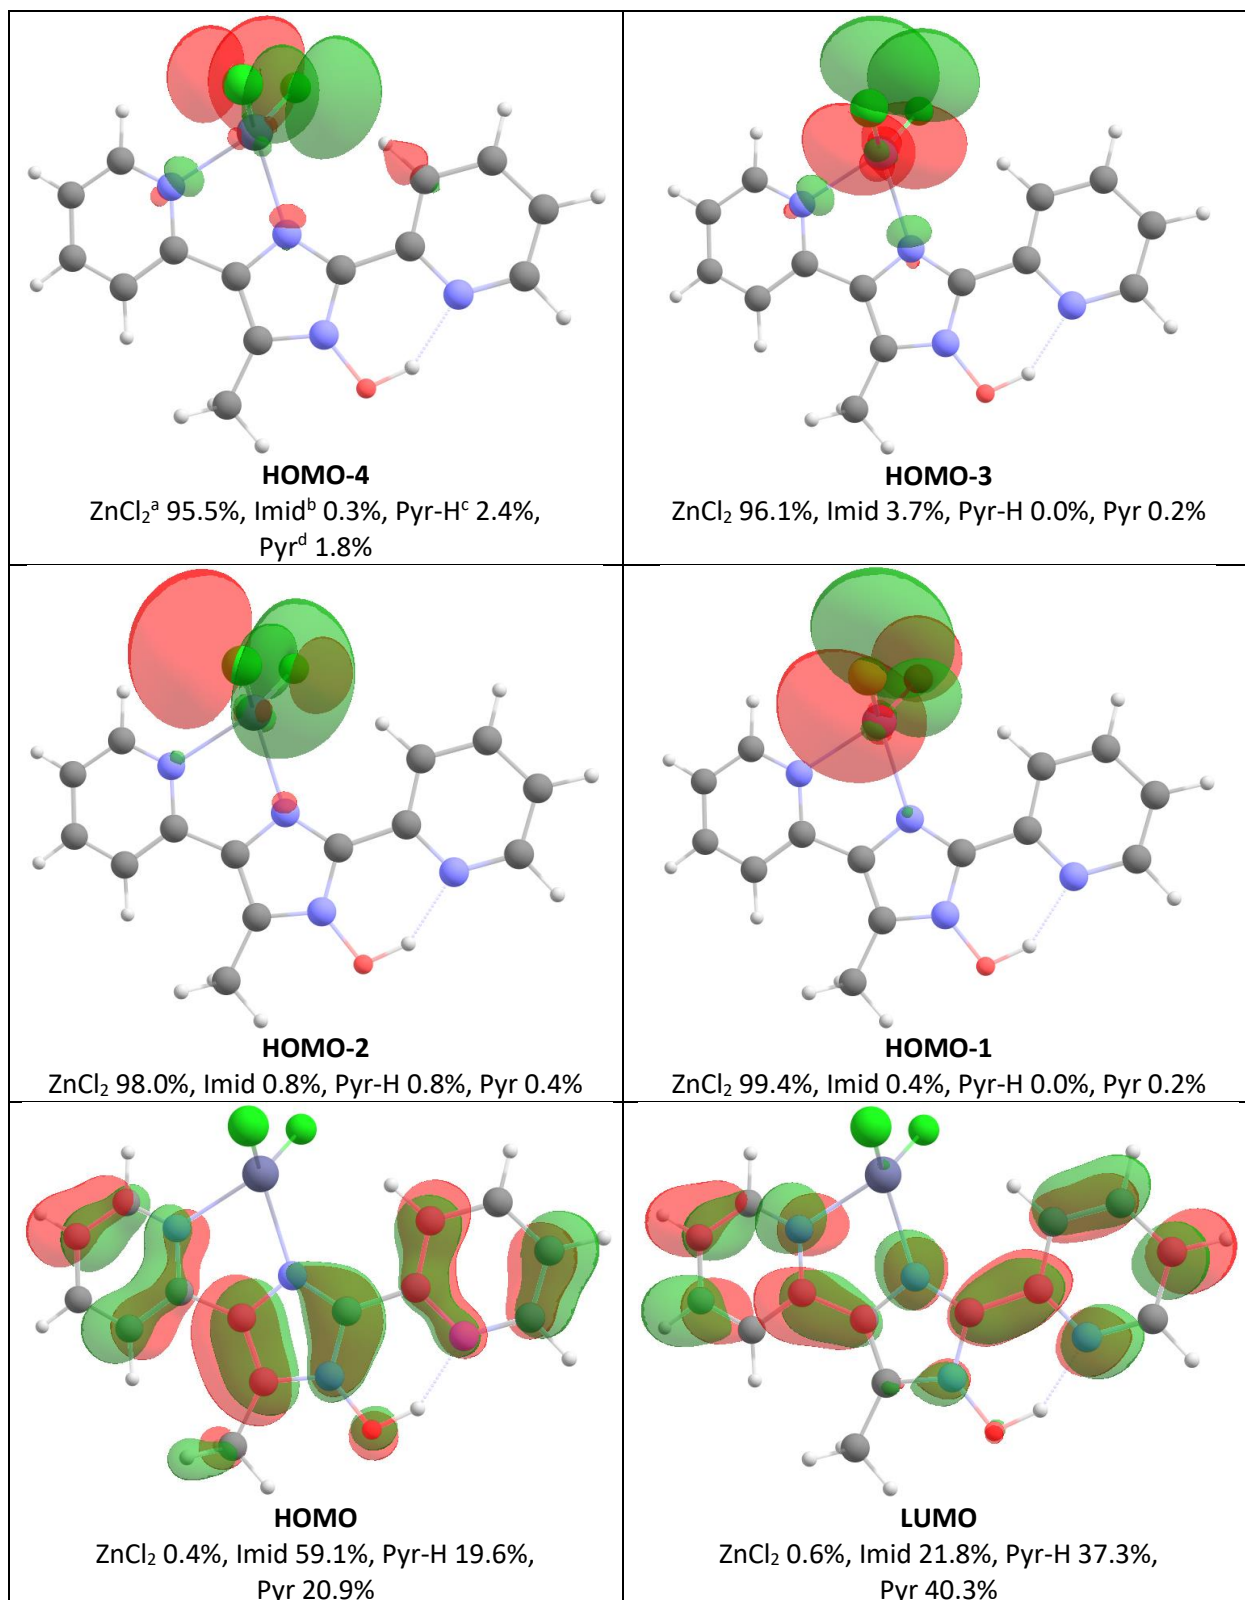

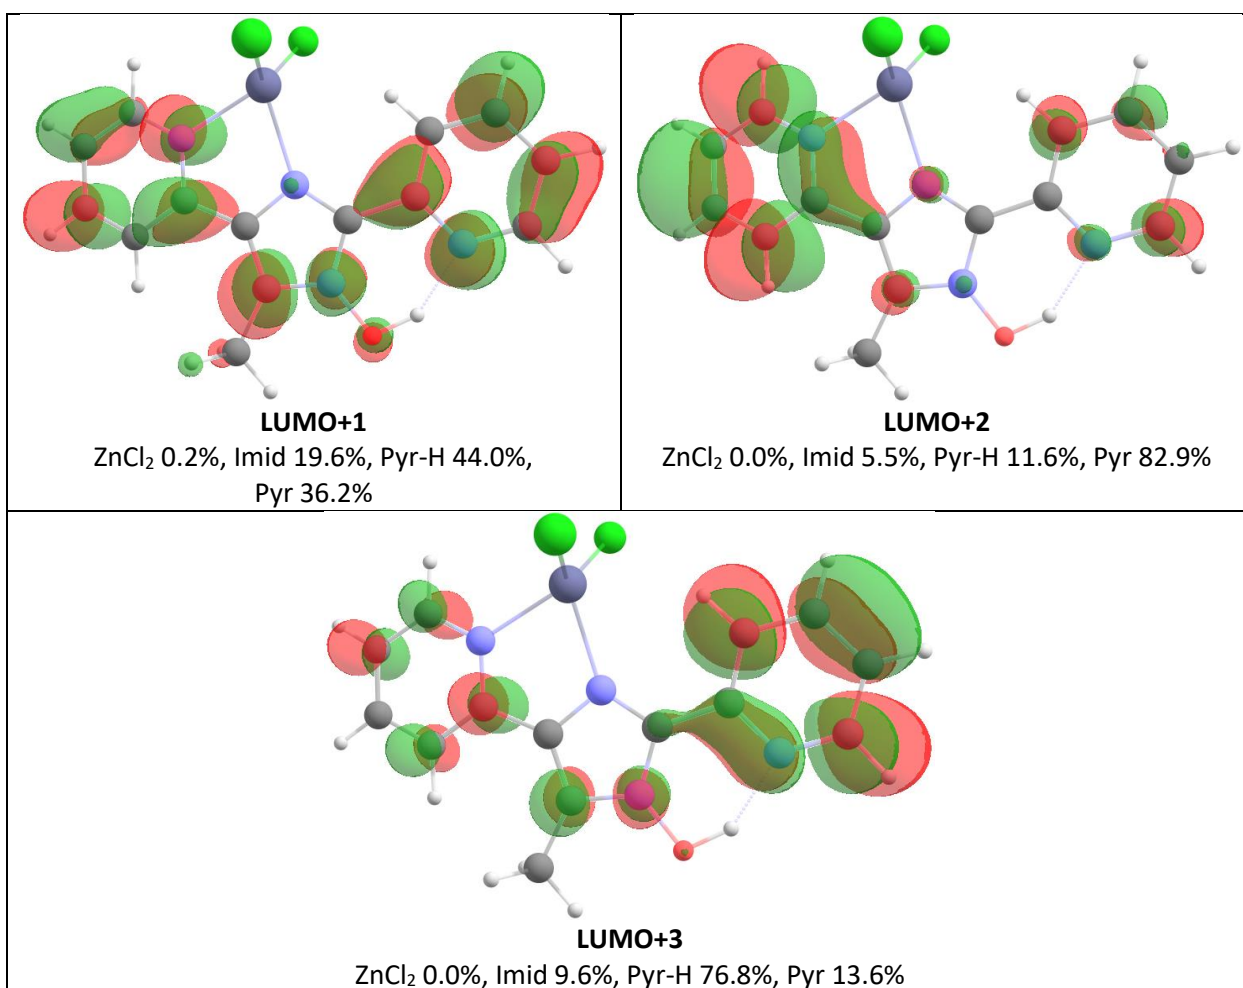

- a – ZnCl<sub>2</sub> group  
 b – Imidazole ring  
 c – proton accepting pyridine ring  
 d – second pyridine ring

**Table S25.** Excited state properties of **ZnHLBr<sub>2</sub>** at the relaxed ground state geometry (**normal form, S<sub>0</sub><sup>N</sup>**, M062X/6-31+g(d) level of theory). Transitions with contribution >10% are shown.

| State | Energy (eV) | Energy (nm) | Contributions (%)       | Oscillator strength | Character |
|-------|-------------|-------------|-------------------------|---------------------|-----------|
| S1    | 4.2858      | 289         | HOMO-2 → LUMO (78.7%)   | 0.5742              | IL + XLCT |
|       |             |             | HOMO-1 → LUMO (13.9%)   |                     |           |
| S2    | 4.5407      | 273         | HOMO → LUMO (94.5%)     | 0.0023              | XLCT      |
| S3    | 4.6360      | 267         | HOMO-2 → LUMO (13.8%)   | 0.0182              | XLCT + IL |
|       |             |             | HOMO-1 → LUMO (80.7%)   |                     |           |
| S4    | 4.7788      | 259         | HOMO-3 → LUMO (87.0%)   | 0.0060              | XLCT      |
| S5    | 4.8405      | 256         | HOMO-2 → LUMO+1 (67.2%) | 0.1033              | IL        |
| S6    | 4.8885      | 254         | HOMO-4 → LUMO (87.3%)   | 0.0091              | XLCT      |
| S7    | 5.1071      | 243         | HOMO-2 → LUMO+2 (69.1%) | 0.0617              | IL        |
| S8    | 5.2134      | 238         | HOMO → LUMO+1 (92.7%)   | 0.0037              | XLCT      |

**Table S26.** Isosurface contour plots of the molecular orbitals of **ZnHLBr<sub>2</sub>** at the ground state geometry (**normal form, S<sub>0</sub><sup>N</sup>**, M062X/6-31+g(d) level of theory). Orbital decomposition resulting from Mulliken population analysis.

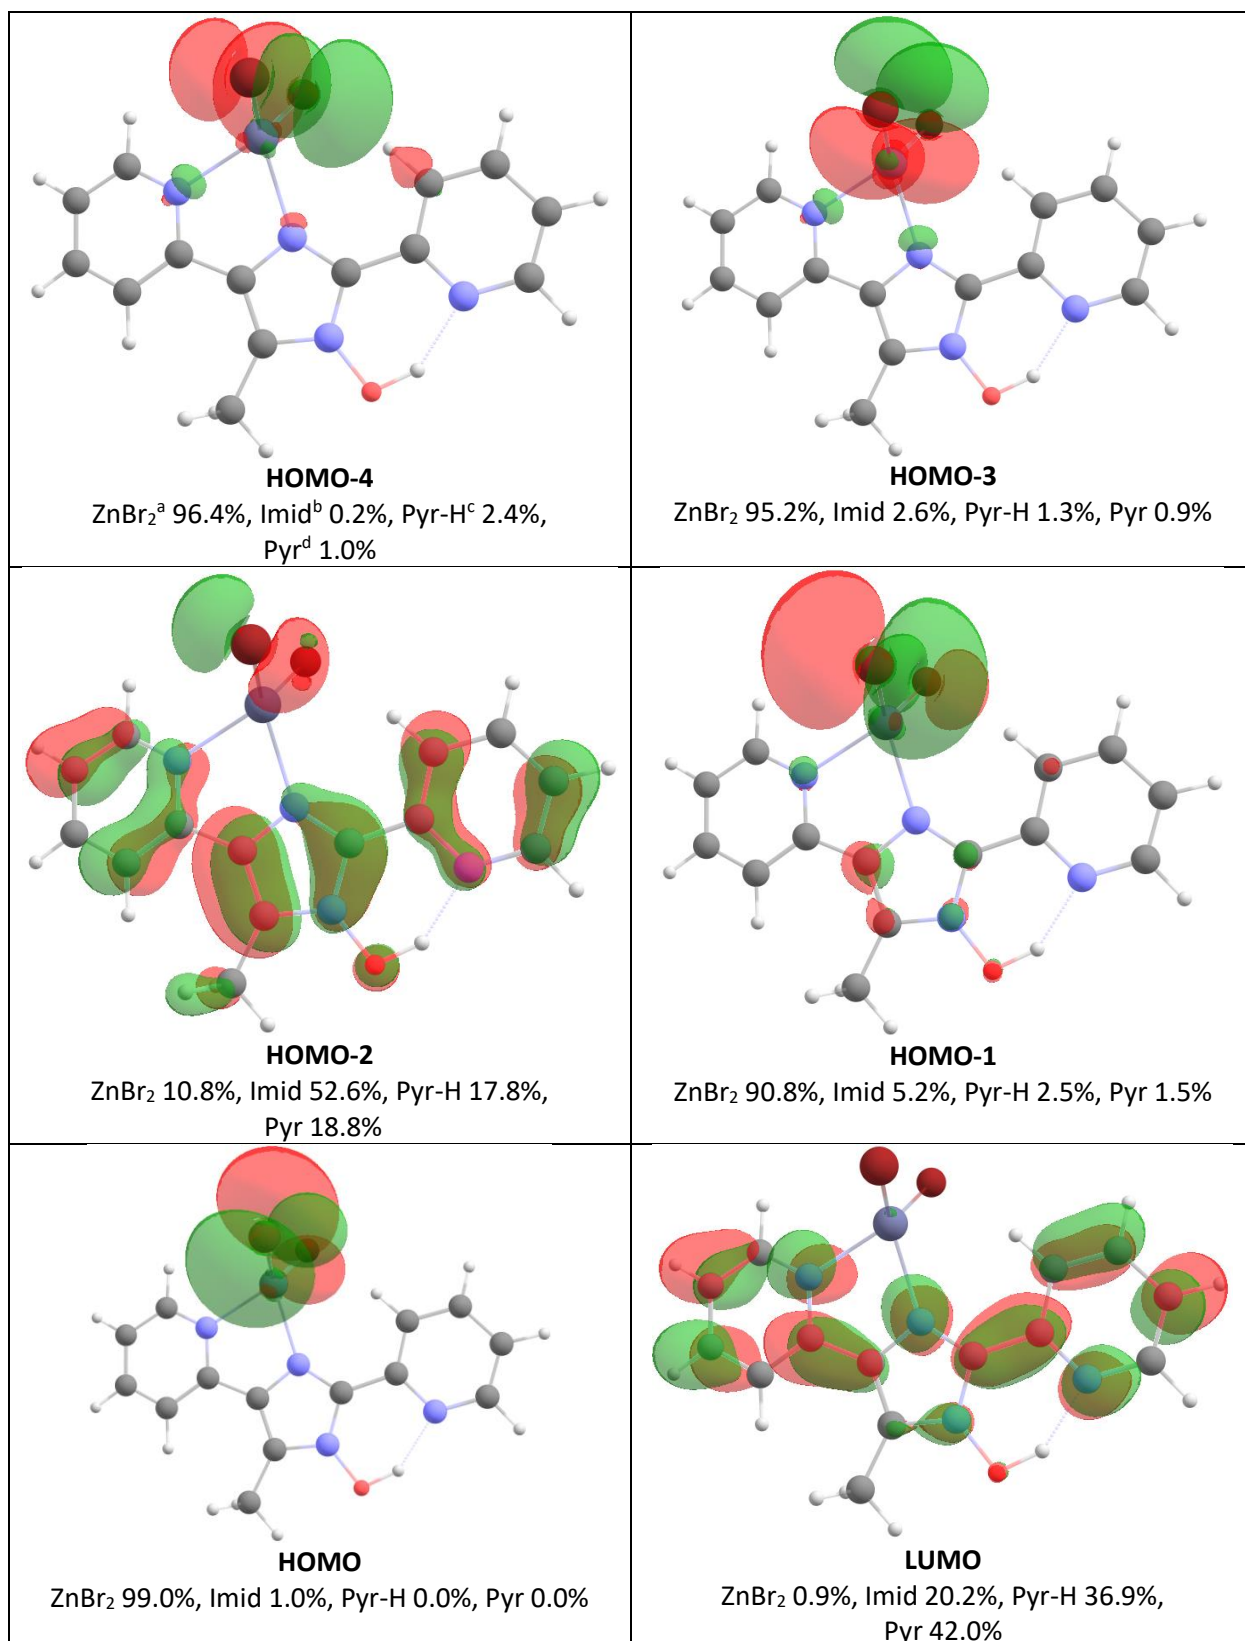

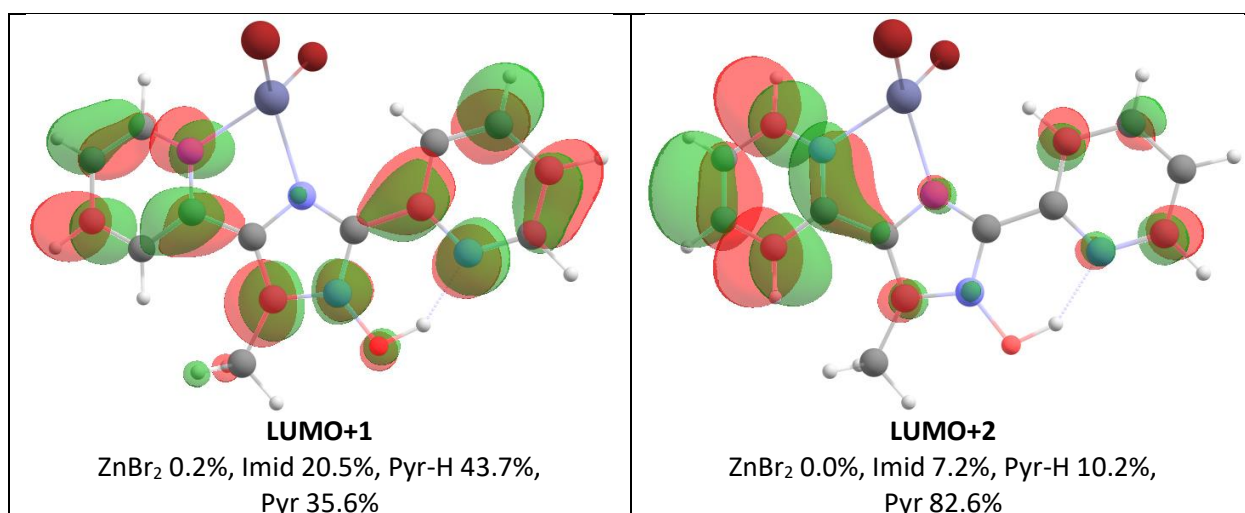

a – ZnBr<sub>2</sub> group  
 b – Imidazole ring  
 c – proton accepting pyridine ring  
 d – second pyridine ring

**Table S27.** Excited state properties of **ZnHLL<sub>2</sub>** at the relaxed ground state geometry (**normal form, S<sub>0</sub><sup>N</sup>**, M062X/6-31+g(d) level of theory). Transitions with contribution >10% are shown.

| State | Energy (eV) | Energy (nm) | Contributions (%)                                                           | Oscillator strength | Character |
|-------|-------------|-------------|-----------------------------------------------------------------------------|---------------------|-----------|
| S1    | 4.0132      | 309         | HOMO → LUMO (96.2%)                                                         | 0.0018              | XLCT      |
| S2    | 4.1082      | 302         | HOMO-1 → LUMO (93.5%)                                                       | 0.0130              | XLCT      |
| S3    | 4.2792      | 290         | HOMO-4 → LUMO (22.5%)<br>HOMO-2 → LUMO (67.7%)                              | 0.1573              | XLCT + IL |
| S4    | 4.2986      | 288         | HOMO-4 → LUMO (49.5%)<br>HOMO-2 → LUMO (26.5%)                              | 0.3474              | IL + XLCT |
| S5    | 4.3949      | 282         | HOMO-3 → LUMO (88.1%)                                                       | 0.0386              | XLCT      |
| S6    | 4.6731      | 265         | HOMO → LUMO+1 (95.8%)                                                       | 0.0012              | XLCT      |
| S7    | 4.7687      | 260         | HOMO-5 → LUMO (25.7%)<br>HOMO-4 → LUMO+1 (18.1%)<br>HOMO-1 → LUMO+1 (35.5%) | 0.0128              | XLCT      |
| S8    | 4.7715      | 260         | HOMO-5 → LUMO (30.2%)<br>HOMO-1 → LUMO+1 (55.1%)                            | 0.0058              | XLCT      |

**Table S28.** Isosurface contour plots of the molecular orbitals of **ZnHLL<sub>2</sub>** at the ground state geometry (**normal form, S<sub>0</sub><sup>N</sup>**, M062X/6-31+g(d) level of theory). Orbital decomposition resulting from Mulliken population analysis.

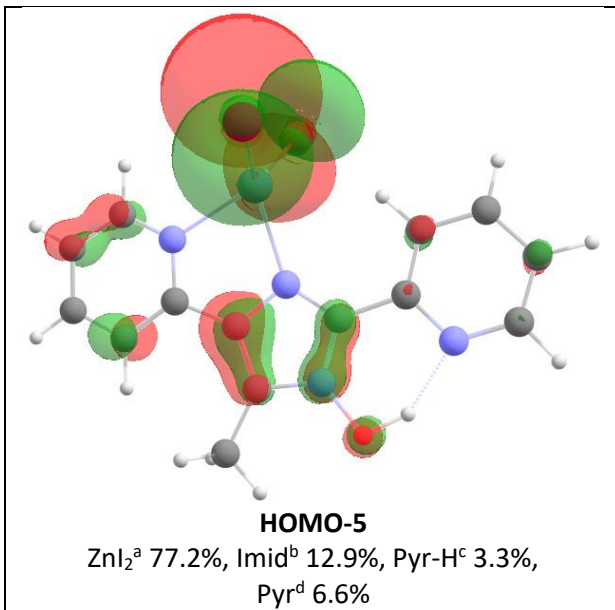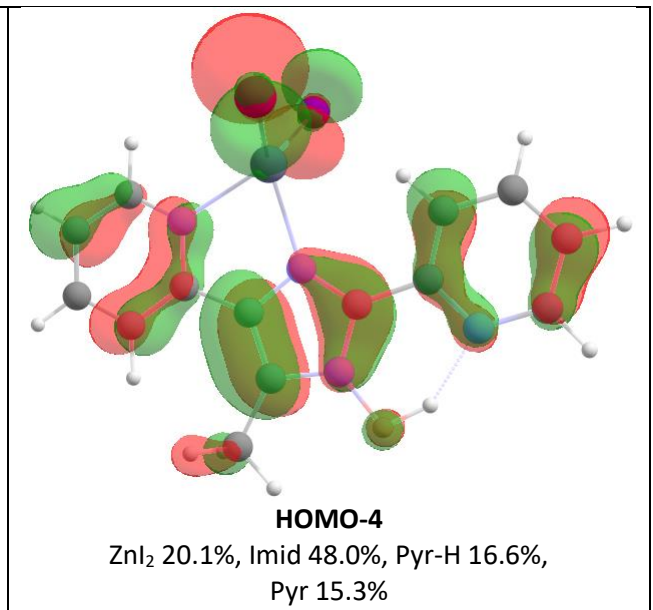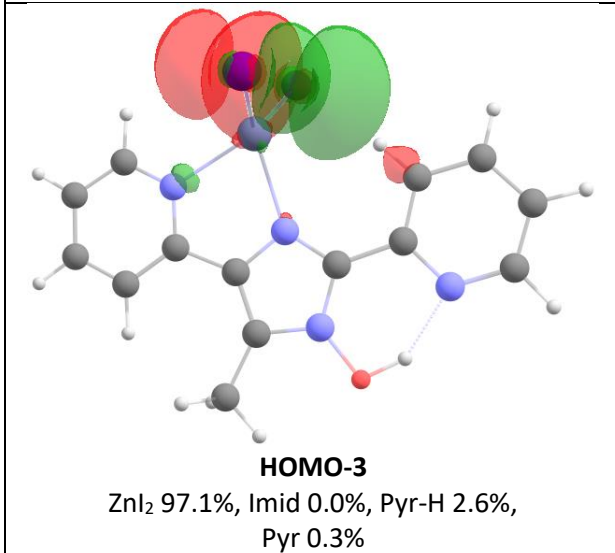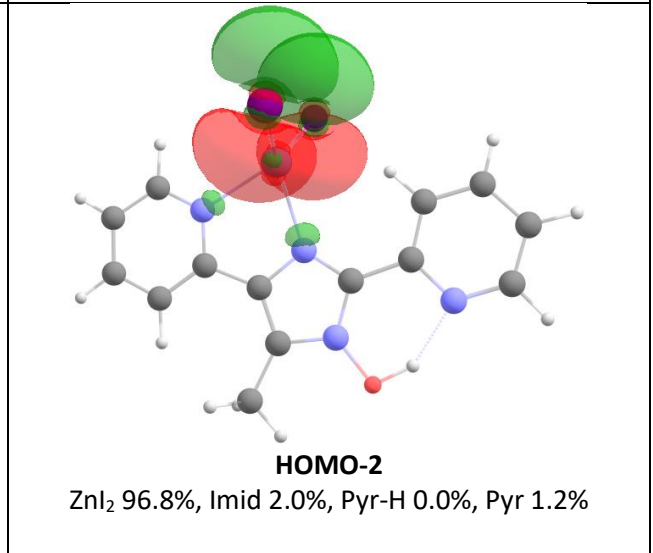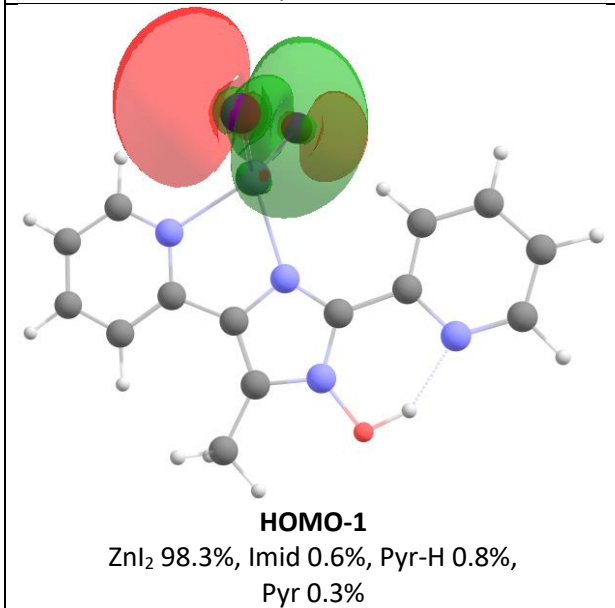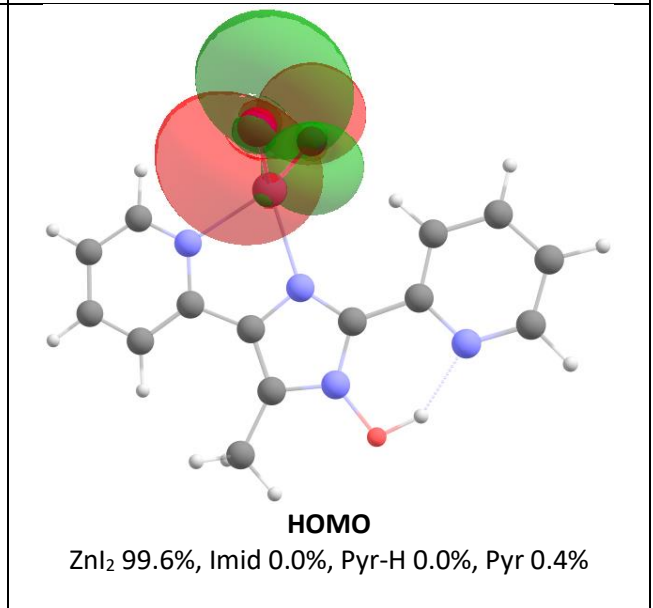

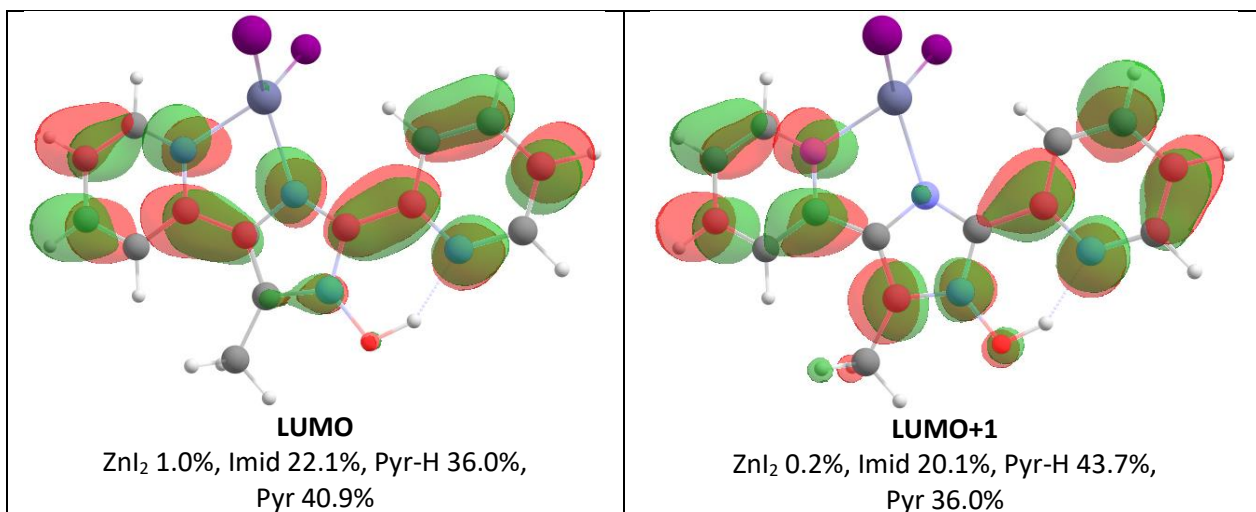

a – ZnL<sub>2</sub> group  
b – Imidazole ring  
c – proton accepting pyridine ring  
d – second pyridine ring

**Table S29.** Excited state properties of ZnHLCl<sub>2</sub> at the relaxed ground state geometry (**minor component**, S<sub>0</sub><sup>minor</sup>, M062X/6-31+g(d) level of theory). Transitions with contribution >10% are shown.

| State | Energy (eV) | Energy (nm) | Contributions (%)                                | Oscillator strength | Character |
|-------|-------------|-------------|--------------------------------------------------|---------------------|-----------|
| S1    | 2.9775      | 416         | HOMO → LUMO (96.7%)                              | 0.2897              | IL        |
| S2    | 3.7315      | 332         | HOMO-1 → LUMO (89.0%)                            | 0.1864              | IL        |
| S3    | 3.8365      | 323         | HOMO → LUMO+1 (81.7%)<br>HOMO → LUMO+2 (10.9%)   | 0.1238              | IL        |
| S4    | 4.2395      | 292         | HOMO → LUMO+2 (81.9%)                            | 0.2545              | IL        |
| S5    | 4.4849      | 276         | HOMO-3 → LUMO (72.4%)                            | 0.0011              | XLCT + IL |
| S6    | 4.5707      | 271         | HOMO → LUMO+3 (81.0%)                            | 0.0126              | IL        |
| S7    | 4.6052      | 269         | HOMO-2 → LUMO (92.5%)                            | 0.0007              | XLCT      |
| S8    | 4.6831      | 265         | HOMO-1 → LUMO+1 (76.6%)<br>HOMO → LUMO+3 (11.2%) | 0.0706              | IL        |

**Table S30.** Isosurface contour plots of the molecular orbitals of **ZnHLCI<sub>2</sub>** at the ground state geometry (**minor component, S<sub>0</sub><sup>minor</sup>**, M062X/6-31+g(d) level of theory). Orbital decomposition resulting from Mulliken population analysis.

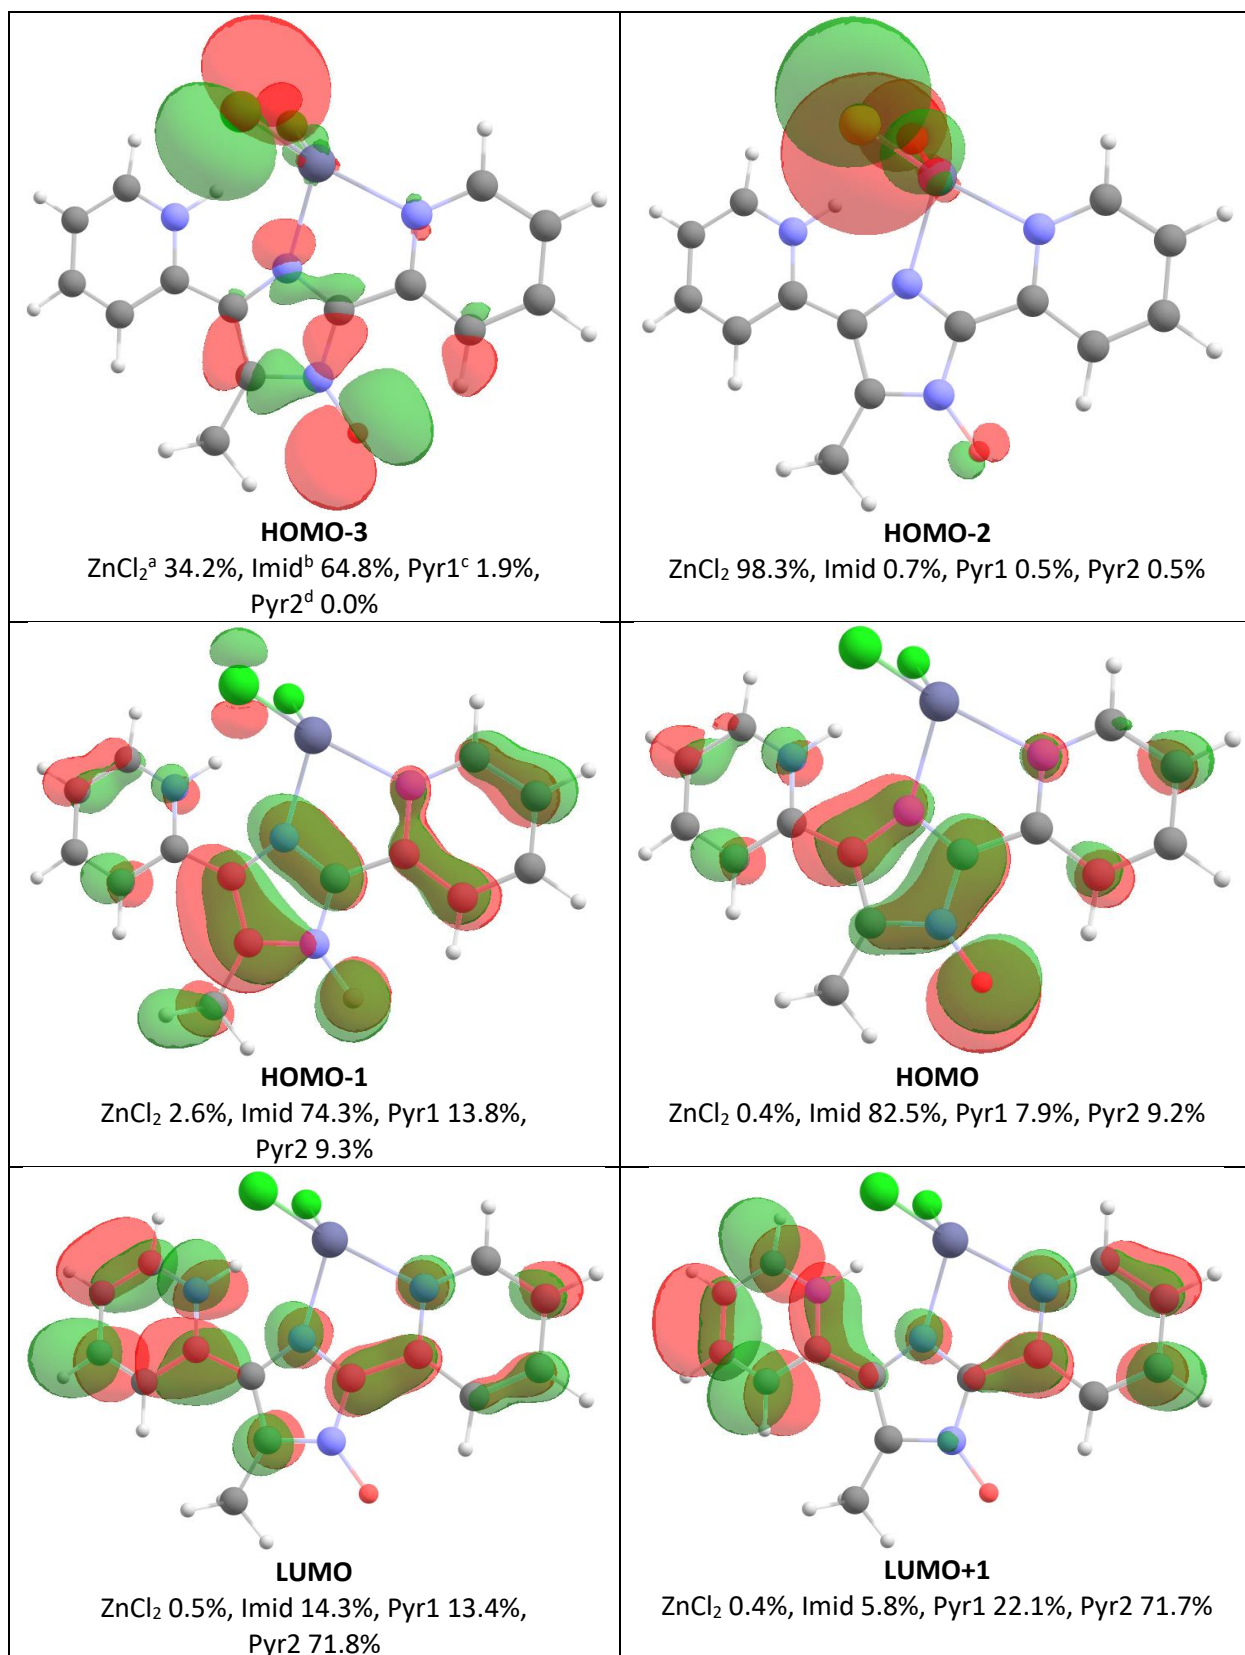



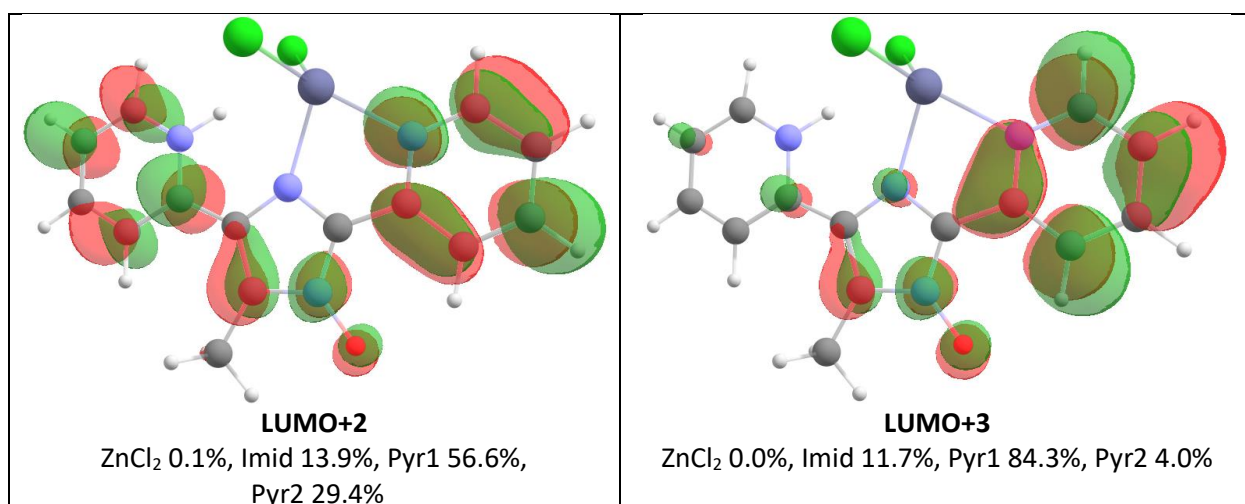

a – ZnCl<sub>2</sub> group

b – Imidazole ring

c – first pyridine ring (which is coordinated to Zn atom)

d – second pyridine ring (which is not coordinated to Zn atom)

**Table S31.** Excited state properties of **ZnHLBr<sub>2</sub>** at the relaxed ground state geometry (**minor component, S<sub>0</sub><sup>minor</sup>**, M062X/6-31+g(d) level of theory). Transitions with contribution >10% are shown.

| State | Energy (eV) | Energy (nm) | Contributions (%)                              | Oscillator strength | Character |
|-------|-------------|-------------|------------------------------------------------|---------------------|-----------|
| S1    | 2.9703      | 417         | HOMO → LUMO (96.6%)                            | 0.2764              | IL        |
| S2    | 3.7216      | 333         | HOMO-1 → LUMO (78.2%)                          | 0.1817              | IL + XLCT |
| S3    | 3.8335      | 323         | HOMO → LUMO+1 (82.4%)                          | 0.1170              | IL        |
| S4    | 4.0906      | 303         | HOMO-2 → LUMO (87.8%)<br>HOMO-1 → LUMO (11.3%) | 0.0001              | XLCT      |
| S5    | 4.2107      | 294         | HOMO-3 → LUMO (50.4%)<br>HOMO → LUMO+1 (37.4%) | 0.0672              | XLCT + IL |
| S6    | 4.2600      | 291         | HOMO-3 → LUMO (43.1%)<br>HOMO → LUMO+1 (45.4%) | 0.1923              | IL + XLCT |
| S7    | 4.4466      | 279         | HOMO-5 → LUMO (20.6%)<br>HOMO-4 → LUMO (68.9%) | 0.0089              | XLCT      |
| S8    | 4.5786      | 271         | HOMO → LUMO+2 (70.5%)                          | 0.0130              | XLCT      |

**Table S32.** Isosurface contour plots of the molecular orbitals of **ZnHLBr<sub>2</sub>** at the ground state geometry (**minor component, S<sub>0</sub><sup>minor</sup>**, M062X/6-31+g(d) level of theory). Orbital decomposition resulting from Mulliken population analysis.

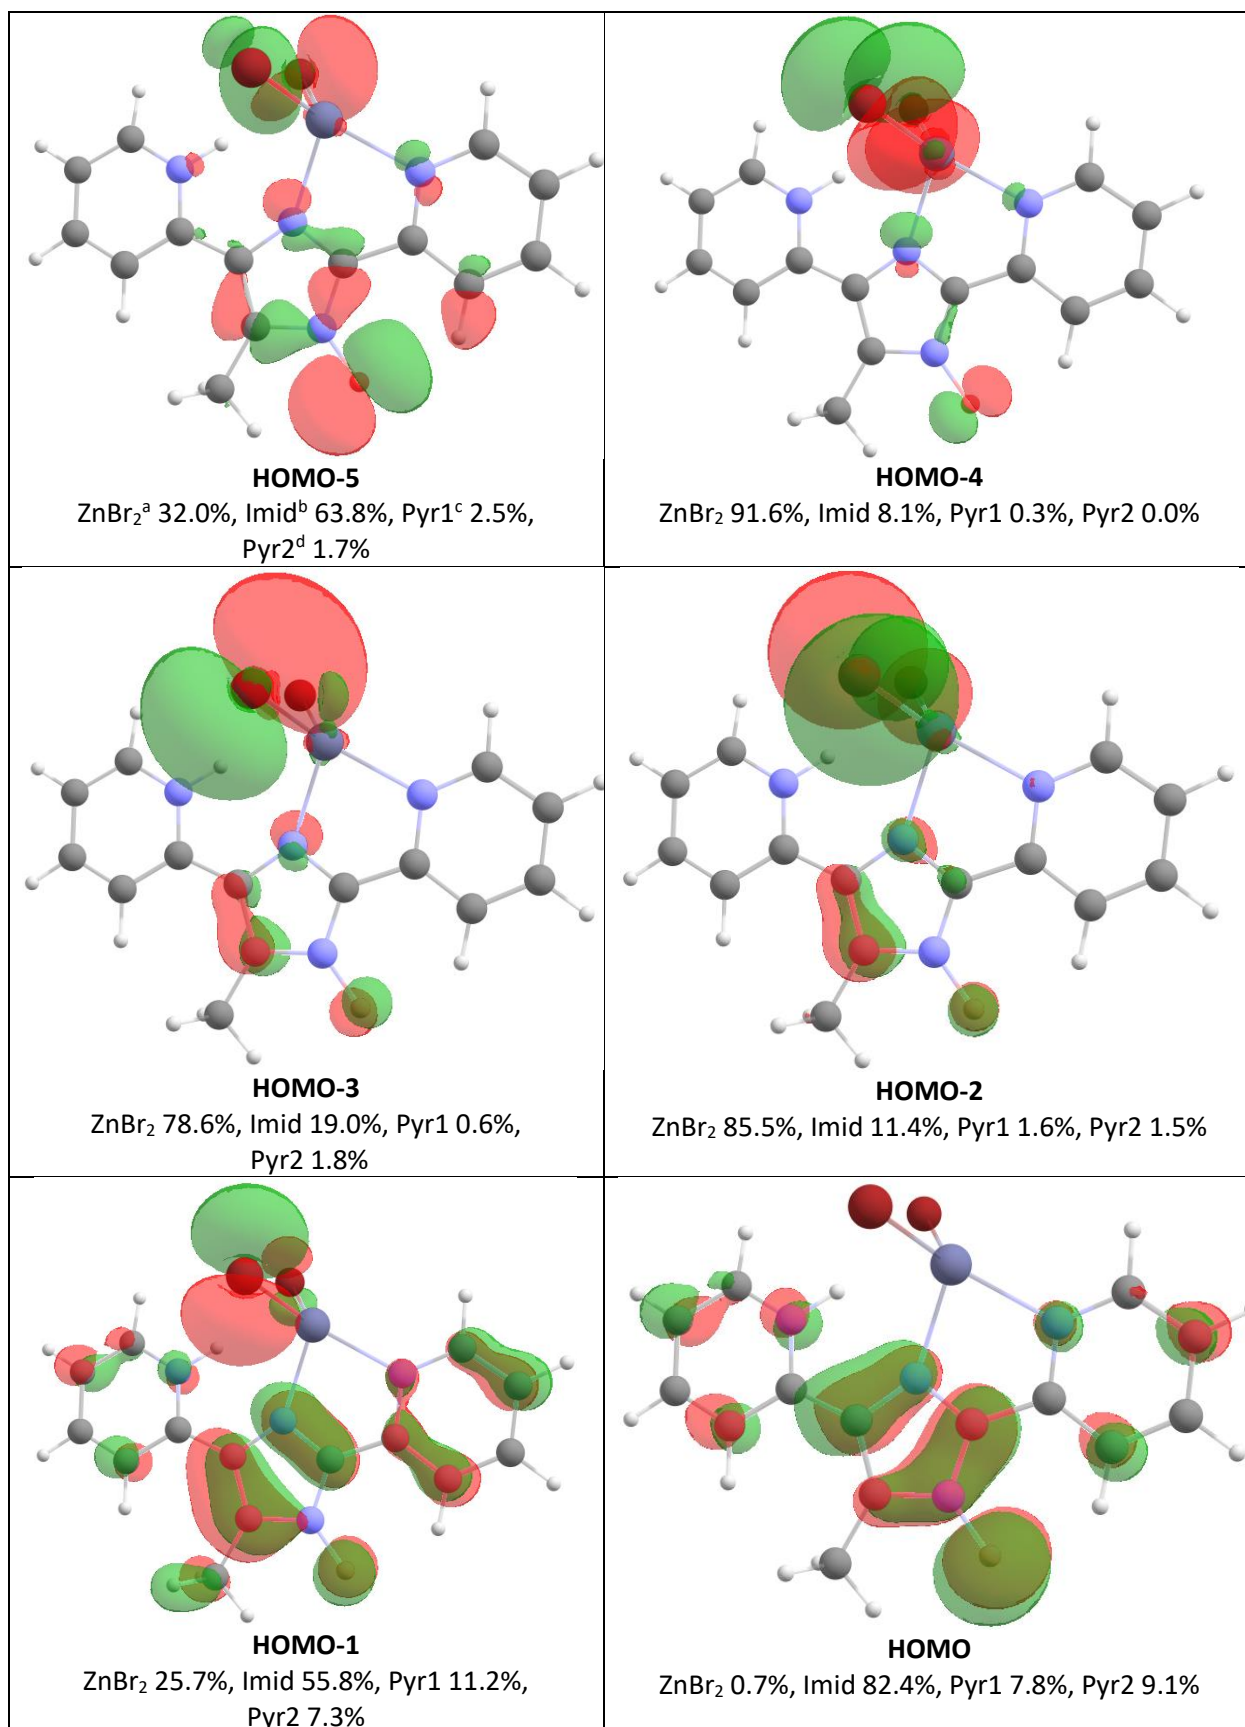

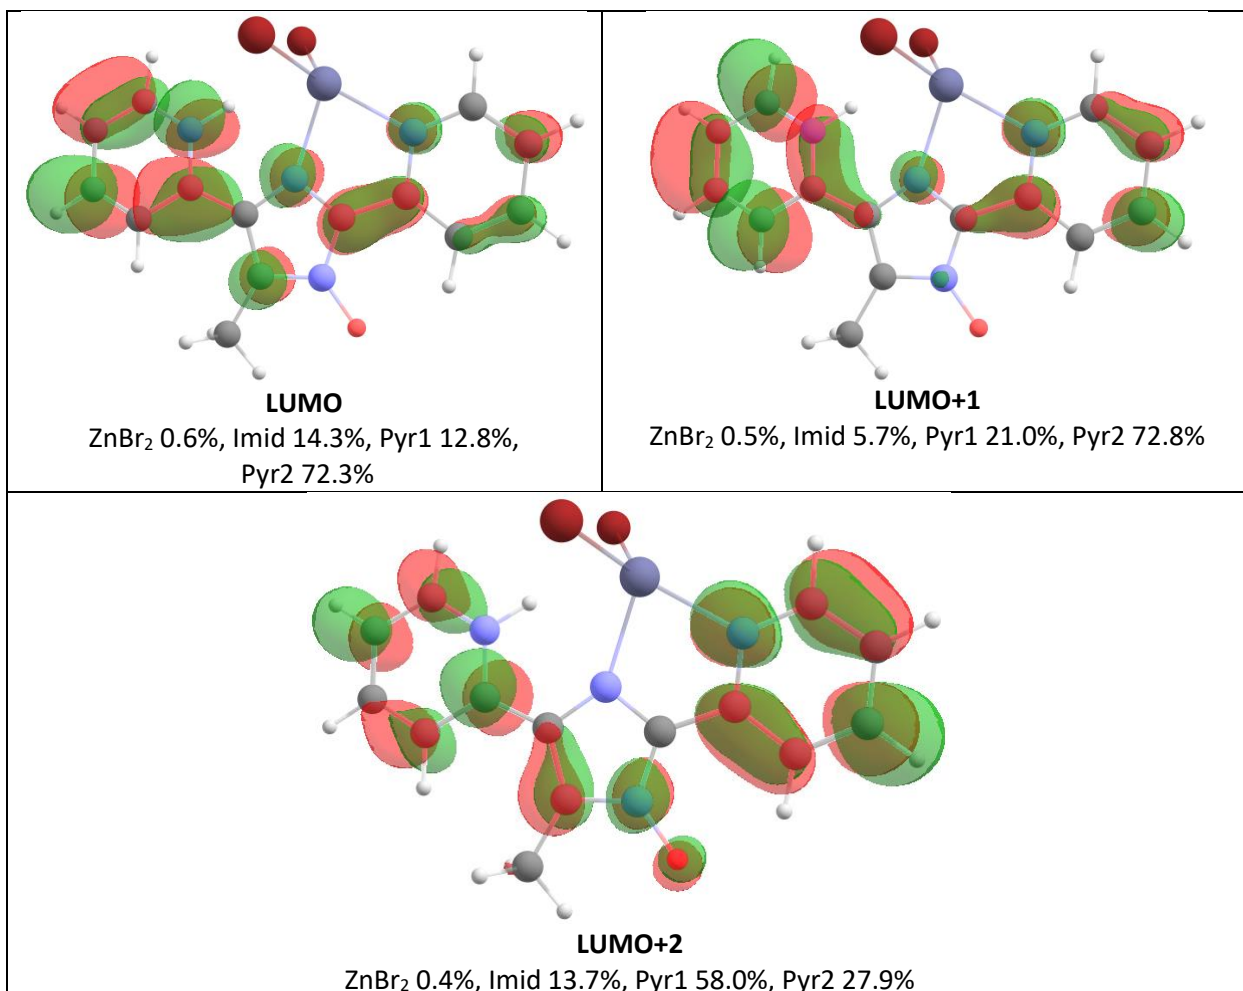

- a – ZnBr<sub>2</sub> group  
b – Imidazole ring  
c – first pyridine ring (which is coordinated to Zn atom)  
d – second pyridine ring (which is not coordinated to Zn atom)

**Table S33.** Excited state properties of ZnHLI<sub>2</sub> at the relaxed ground state geometry (**minor component**, S<sub>0</sub><sup>minor</sup>, M062X/6-31+g(d) level of theory). Transitions with contribution >10% are shown.

| State | Energy (eV) | Energy (nm) | Contributions (%)                                                       | Oscillator strength | Character |
|-------|-------------|-------------|-------------------------------------------------------------------------|---------------------|-----------|
| S1    | 2.9503      | 420         | HOMO → LUMO (96.5%)                                                     | 0.2544              | IL        |
| S2    | 3.5335      | 351         | HOMO-1 → LUMO (97.1%)                                                   | 0.0167              | XLCT      |
| S3    | 3.6241      | 342         | HOMO-4 → LUMO (13.2%)<br>HOMO-2 → LUMO (80.8%)                          | 0.0655              | XLCT + IL |
| S4    | 3.7676      | 329         | HOMO-4 → LUMO (60.4%)<br>HOMO-2 → LUMO (12.5%)<br>HOMO → LUMO+1 (19.3%) | 0.0883              | XLCT + IL |
| S5    | 3.8413      | 323         | HOMO-4 → LUMO (11.4%)<br>HOMO → LUMO+1 (66.5%)                          | 0.1349              | IL + XLCT |

|    |        |     |                       |        |      |
|----|--------|-----|-----------------------|--------|------|
|    |        |     | HOMO → LUMO+2 (11.6%) |        |      |
| S6 | 3.9636 | 313 | HOMO-3 → LUMO (95.6%) | 0.0048 | XLCT |
| S7 | 4.1466 | 299 | HOMO-5 → LUMO (95.9%) | 0.0041 | XLCT |
| S8 | 4.2430 | 292 | HOMO → LUMO+2 (80.7%) | 0.2301 | IL   |

**Table S34.** Isosurface contour plots of the molecular orbitals of **ZnHLI<sub>2</sub>** at the ground state geometry (**minor component, S<sub>0</sub><sup>minor</sup>**, M062X/6-31+g(d) level of theory). Orbital decomposition resulting from Mulliken population analysis.

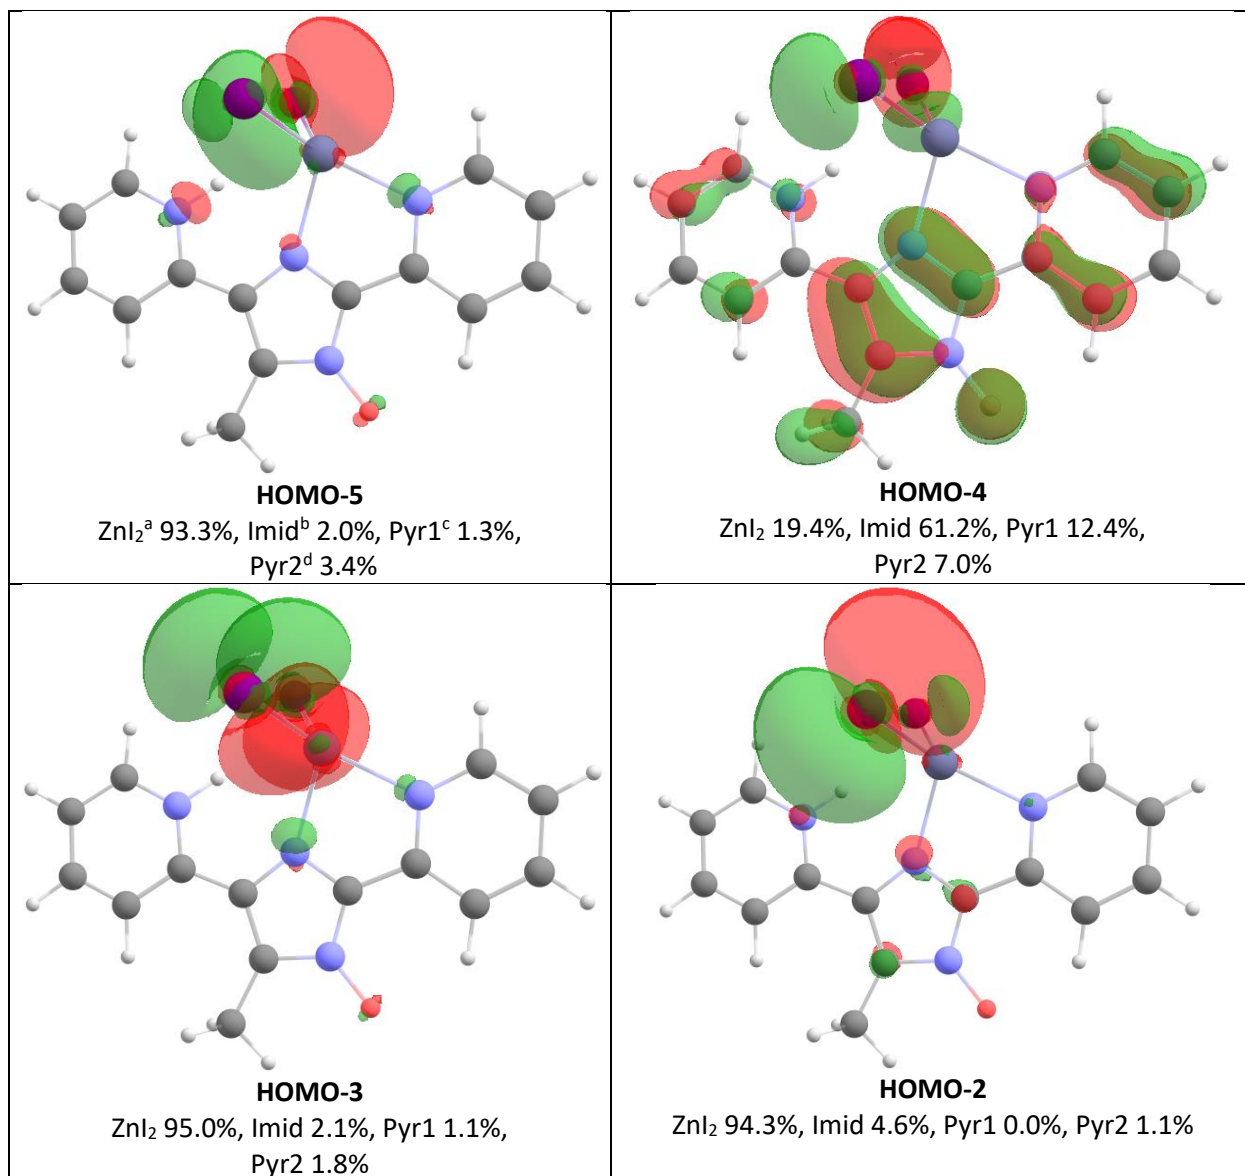

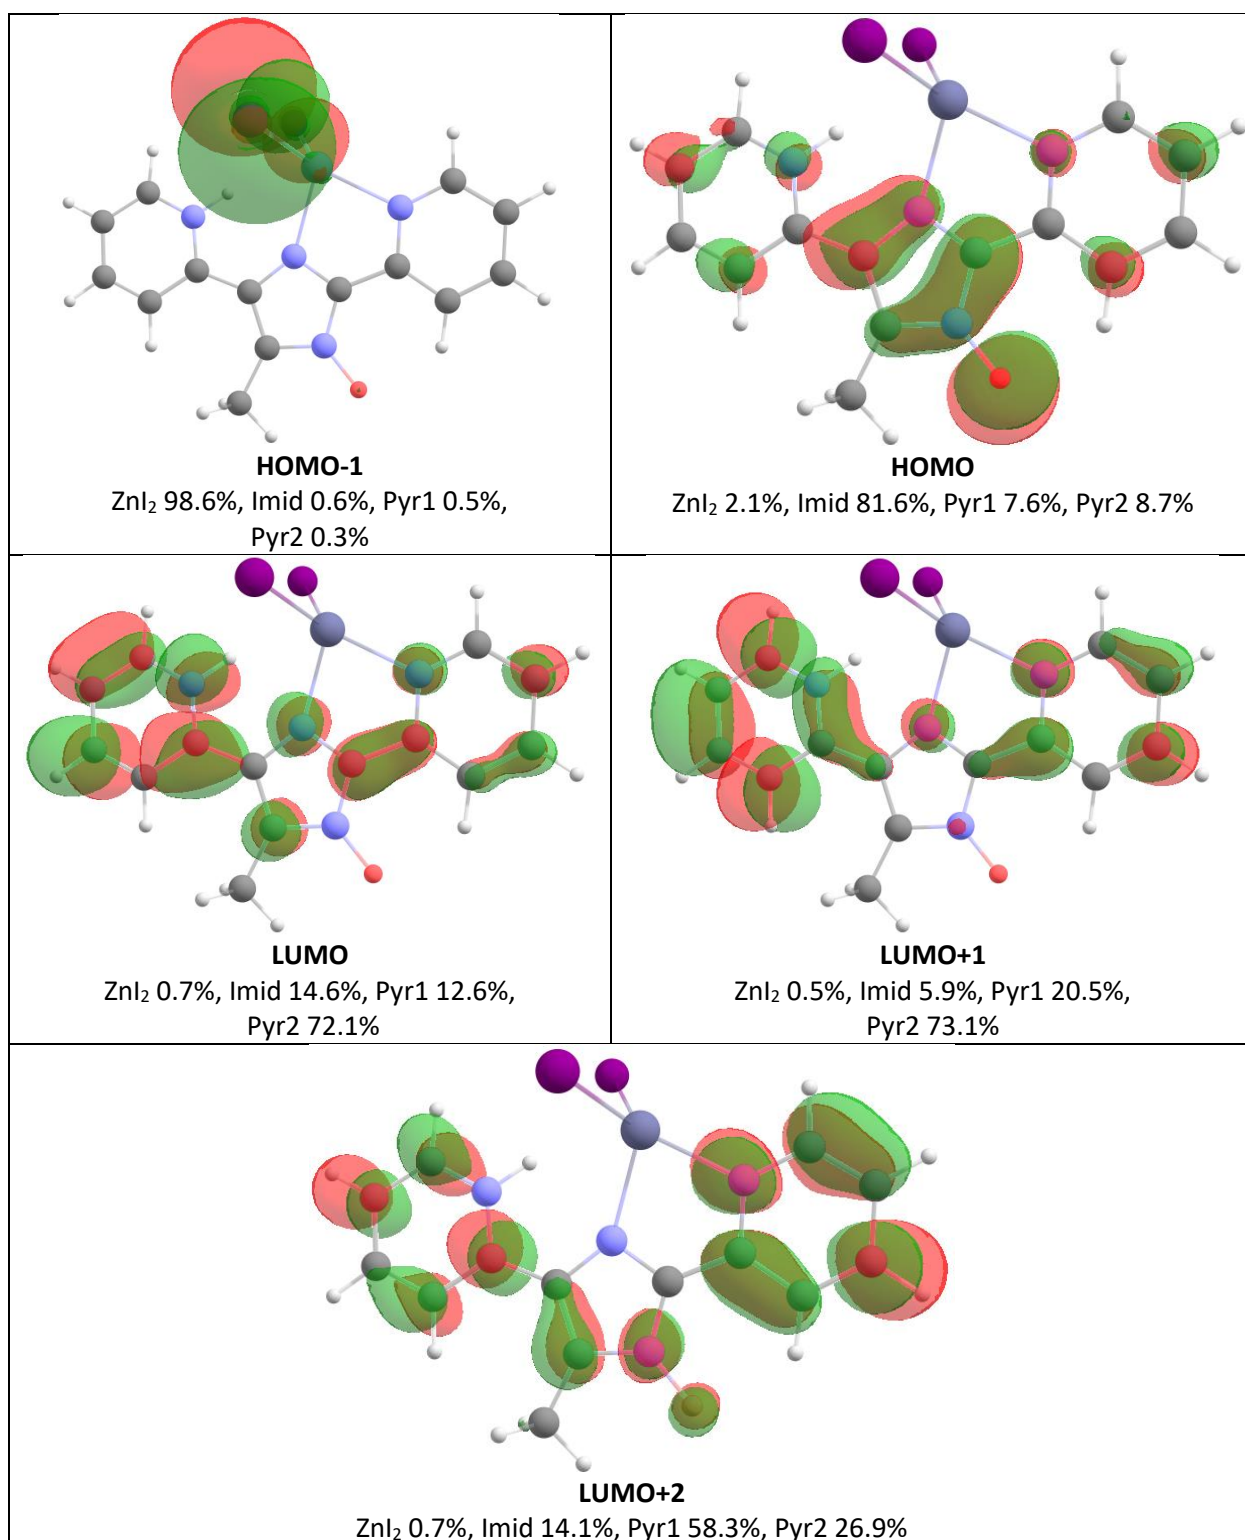

- a – ZnI<sub>2</sub> group  
b – Imidazole ring  
c – first pyridine ring (which is coordinated to Zn atom)  
d – second pyridine ring (which is not coordinated to Zn atom)

**Table S35.** Excited state properties of ZnHLCl<sub>2</sub> at the relaxed ground state geometry (local minimum in the **tautomeric form**, S<sub>0</sub><sup>T</sup>, M062X/6-31+g(d) level of theory). Transitions with contribution >10% are shown.

| State | Energy (eV) | Energy (nm) | Contributions (%) | Oscillator strength | Character |
|-------|-------------|-------------|-------------------|---------------------|-----------|
|-------|-------------|-------------|-------------------|---------------------|-----------|

|    |        |     |                                                |        |           |
|----|--------|-----|------------------------------------------------|--------|-----------|
| S1 | 2.6811 | 462 | HOMO → LUMO (97.2%)                            | 0.1371 | IL        |
| S2 | 3.6530 | 339 | HOMO → LUMO+1 (97.1%)                          | 0.0896 | IL        |
| S3 | 3.8499 | 322 | HOMO-1 → LUMO (88.8%)                          | 0.2914 | IL        |
| S4 | 4.2294 | 293 | HOMO-7 → LUMO (49.9%)<br>HOMO → LUMO+2 (15.8%) | 0.0663 | IL        |
| S5 | 4.3625 | 284 | HOMO-2 → LUMO (23.7%)<br>HOMO → LUMO+2 (60.5%) | 0.0944 | IL + XLCT |
| S6 | 4.3792 | 283 | HOMO-2 → LUMO (65.2%)<br>HOMO → LUMO+2 (12.6%) | 0.0228 | IL + XLCT |
| S7 | 4.4522 | 278 | HOMO-3 → LUMO (81.9%)                          | 0.0053 | XLCT      |
| S8 | 4.6167 | 269 | HOMO-7 → LUMO (10.8%)<br>HOMO-4 → LUMO (83.6%) | 0.0029 | XLCT      |

**Table S36.** Isosurface contour plots of the molecular orbitals of **ZnHLCl<sub>2</sub>** at the ground state geometry (local minimum in the **tautomeric form**, **S<sub>0</sub><sup>T</sup>**, M062X/6-31+g(d) level of theory). Orbital decomposition resulting from Mulliken population analysis.

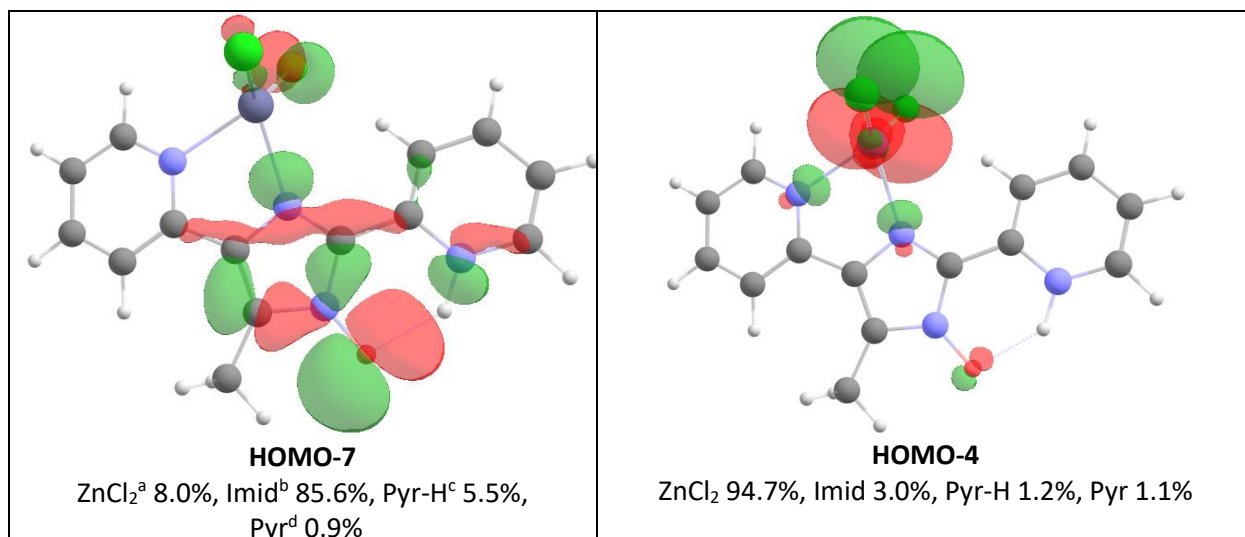

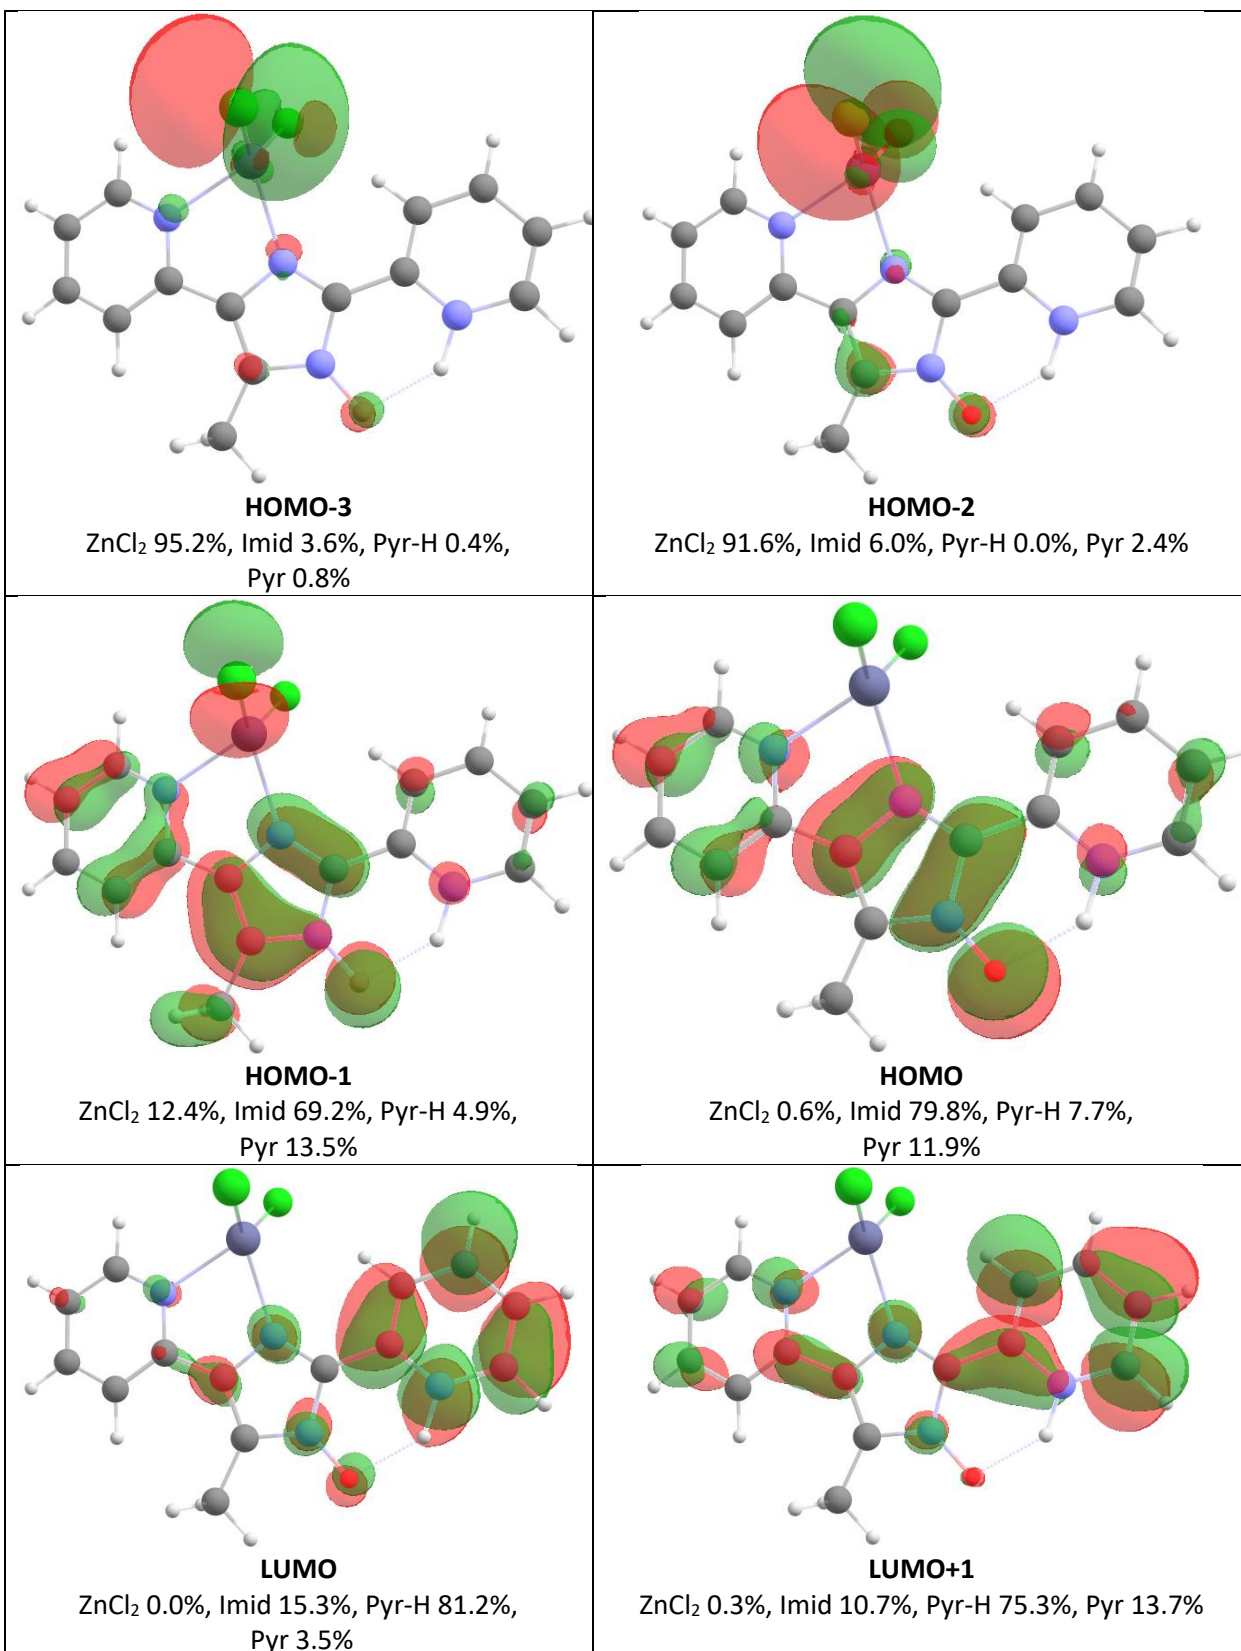

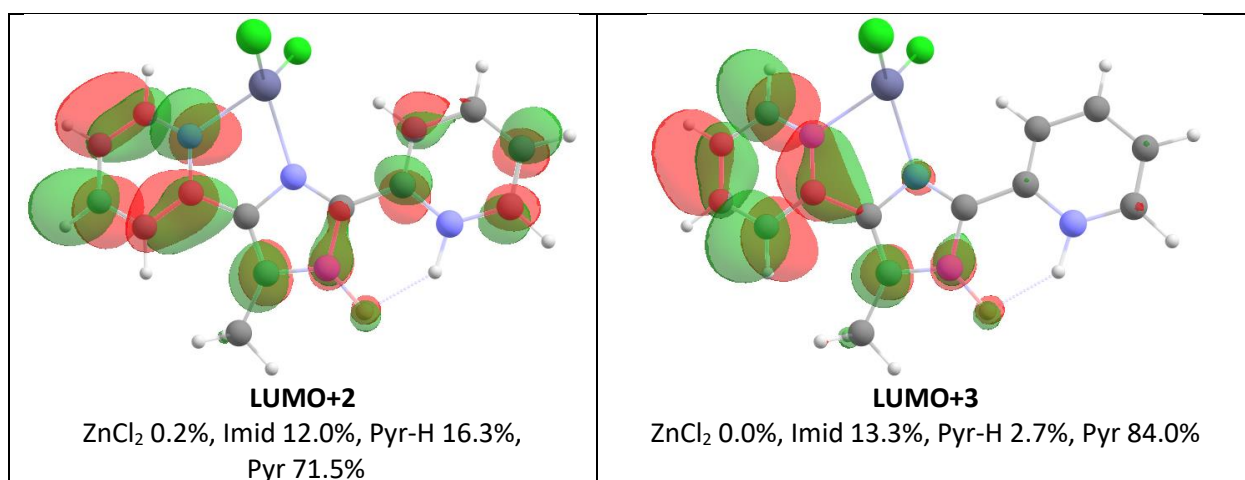

a – ZnCl<sub>2</sub> group  
 b – Imidazole ring  
 c – proton accepting pyridine ring  
 d – second pyridine ring

**Table S37.** Excited state properties of ZnHLBr<sub>2</sub> at the relaxed ground state geometry (local minimum in the **tautomeric form**, S<sub>0</sub><sup>T</sup>, M062X/6-31+g(d) level of theory). Transitions with contribution >10% are shown.

| State | Energy (eV) | Energy (nm) | Contributions (%)                                                       | Oscillator strength | Character |
|-------|-------------|-------------|-------------------------------------------------------------------------|---------------------|-----------|
| S1    | 2.6639      | 465         | HOMO → LUMO (97.1%)                                                     | 0.1305              | IL        |
| S2    | 3.6480      | 340         | HOMO → LUMO+1 (97.0%)                                                   | 0.0822              | IL        |
| S3    | 3.7747      | 328         | HOMO-4 → LUMO (28.0%)<br>HOMO-1 → LUMO (57.7%)                          | 0.1364              | XLCT + IL |
| S4    | 3.8807      | 319         | HOMO-4 → LUMO (28.9%)<br>HOMO-2 → LUMO (25.0%)<br>HOMO-1 → LUMO (38.9%) | 0.0854              | XLCT + IL |
| S5    | 3.9325      | 315         | HOMO-4 → LUMO (29.3%)<br>HOMO-2 → LUMO (64.1%)                          | 0.0662              | XLCT + IL |
| S6    | 4.0756      | 304         | HOMO-3 → LUMO (79.4%)                                                   | 0.0065              | XLCT      |
| S7    | 4.2085      | 295         | HOMO-5 → LUMO (85.7%)                                                   | 0.0026              | XLCT      |
| S8    | 4.2800      | 290         | HOMO-7 → LUMO (28.7%)<br>HOMO → LUMO+2 (42.3%)                          | 0.0932              | XLCT + IL |



**Table S38.** Isosurface contour plots of the molecular orbitals of **ZnHLBr<sub>2</sub>** at the ground state geometry (local minimum in the **tautomeric form**, **S<sub>0</sub><sup>T</sup>**, M062X/6-31+g(d) level of theory). Orbital decomposition resulting from Mulliken population analysis.

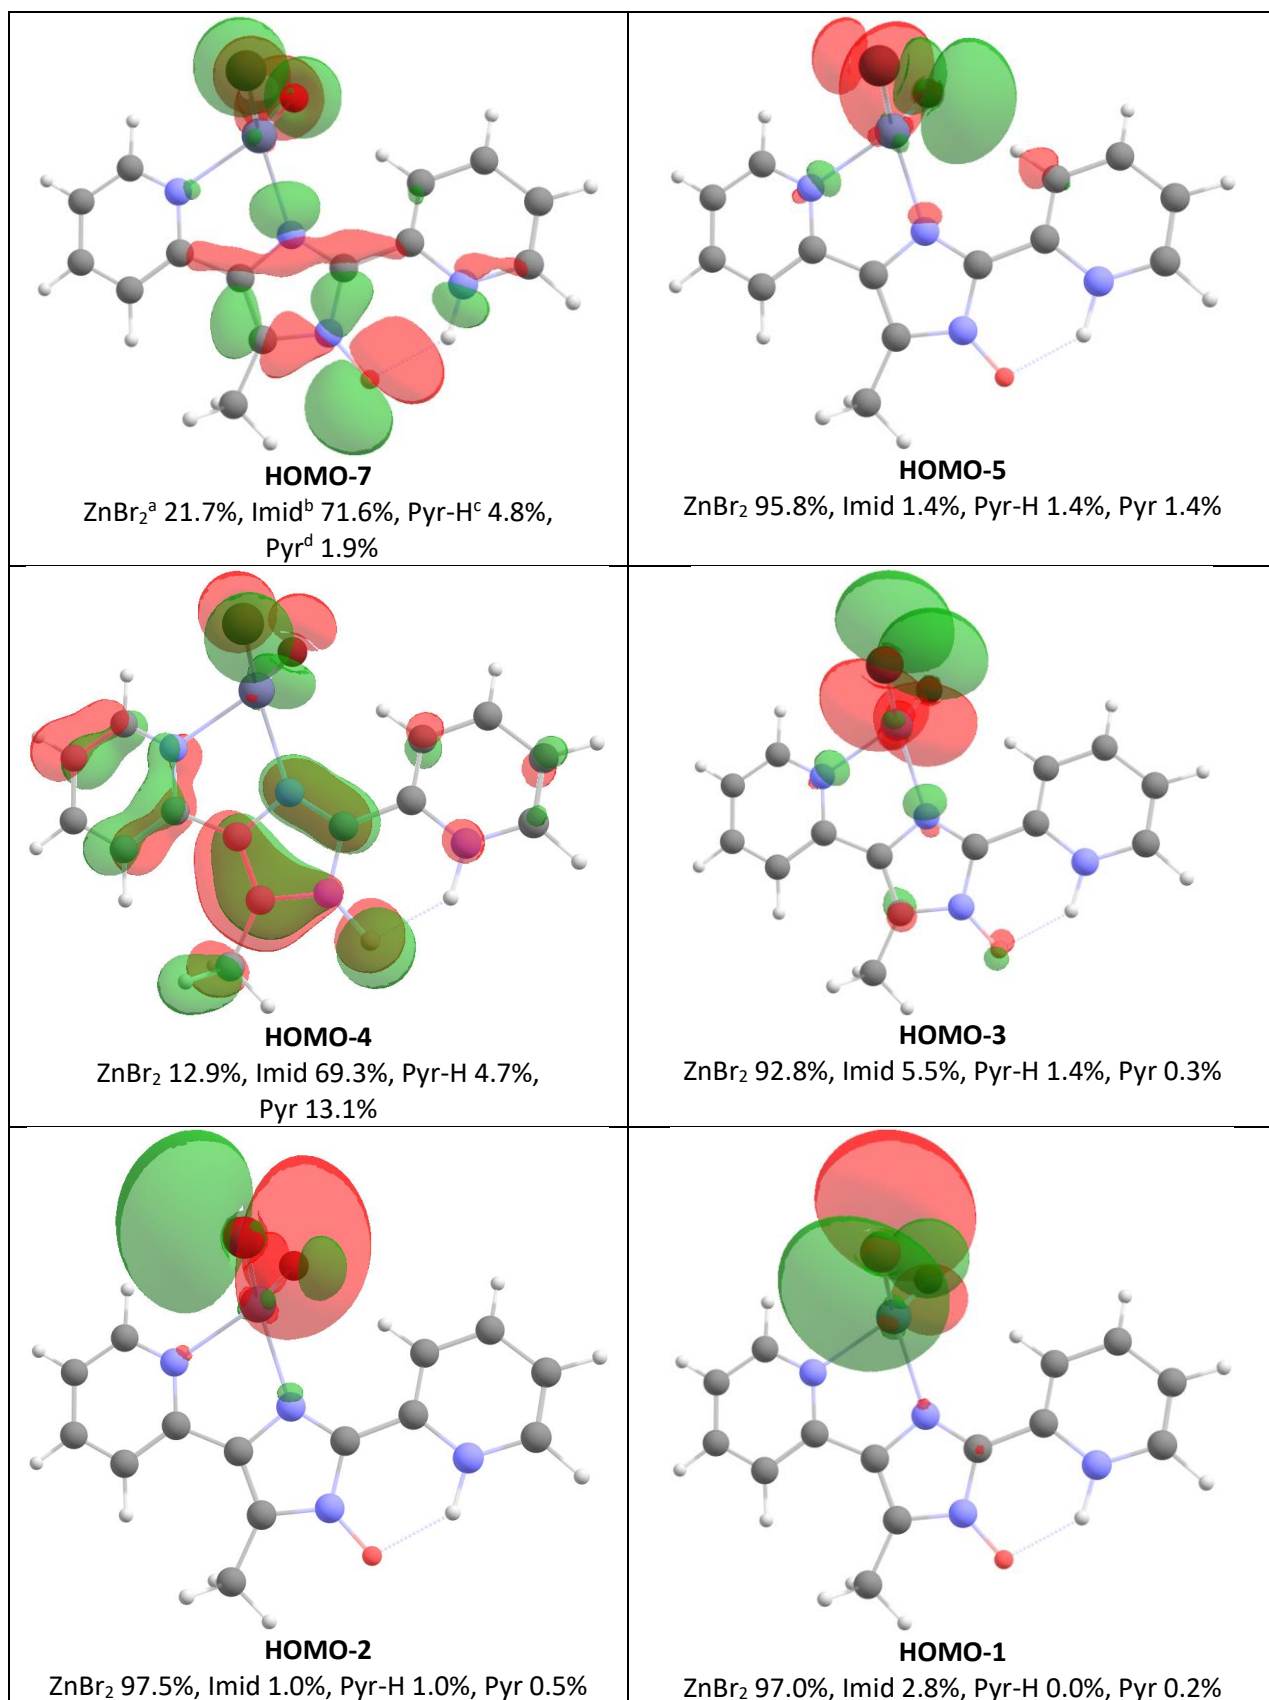

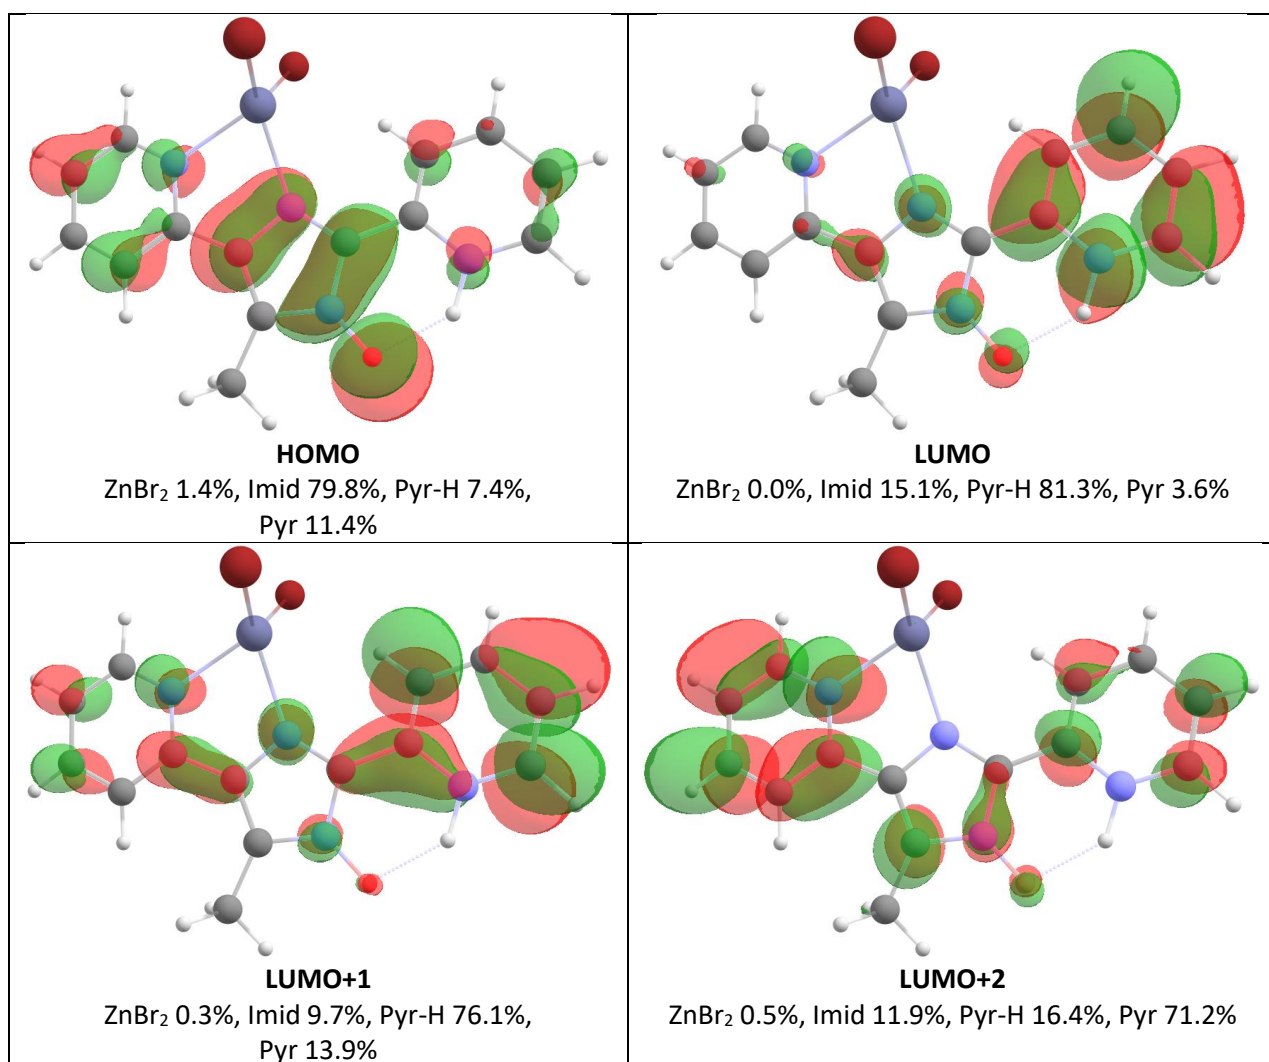

a – ZnBr<sub>2</sub> group  
b – Imidazole ring  
c – proton accepting pyridine ring  
d – second pyridine ring

**Table S39.** Excited state properties of **ZnHLI<sub>2</sub>** at the relaxed ground state geometry (local minimum in the tautomeric form,  $S_0^T$ , M062X/6-31+g(d) level of theory). Transitions with contribution >10% are shown.

| State | Energy (eV) | Energy (nm) | Contributions (%)                              | Oscillator strength | Character |
|-------|-------------|-------------|------------------------------------------------|---------------------|-----------|
| S1    | 2.6213      | 473         | HOMO → LUMO (87.0%)                            | 0.1244              | IL + MLCT |
| S2    | 3.2553      | 381         | HOMO-1 → LUMO (87.2%)                          | 0.0039              | MLCT      |
| S3    | 3.3534      | 370         | HOMO-2 → LUMO (93.5%)                          | 0.0018              | MLCT      |
| S4    | 3.5466      | 350         | HOMO-3 → LUMO (95.9%)                          | 0.0027              | MLCT      |
| S5    | 3.6094      | 344         | HOMO → LUMO+1 (87.9%)                          | 0.0720              | IL + MLCT |
| S6    | 3.6653      | 338         | HOMO-4 → LUMO (97.0%)                          | 0.0019              | MLCT      |
| S7    | 3.7797      | 328         | HOMO-6 → LUMO (23.3%)<br>HOMO-5 → LUMO (69.7%) | 0.2233              | IL + MLCT |

|    |        |     |                         |        |      |
|----|--------|-----|-------------------------|--------|------|
| S8 | 4.1399 | 299 | HOMO-1 → LUMO+1 (81.5%) | 0.0038 | MLCT |
|----|--------|-----|-------------------------|--------|------|

**Table S40.** Isosurface contour plots of the molecular orbitals of **ZnHLI<sub>2</sub>** at the ground state geometry (local minimum in the **tautomeric form**, **S<sub>0</sub><sup>T</sup>**, M062X/6-31+g(d) level of theory). Orbital decomposition resulting from Mulliken population analysis.

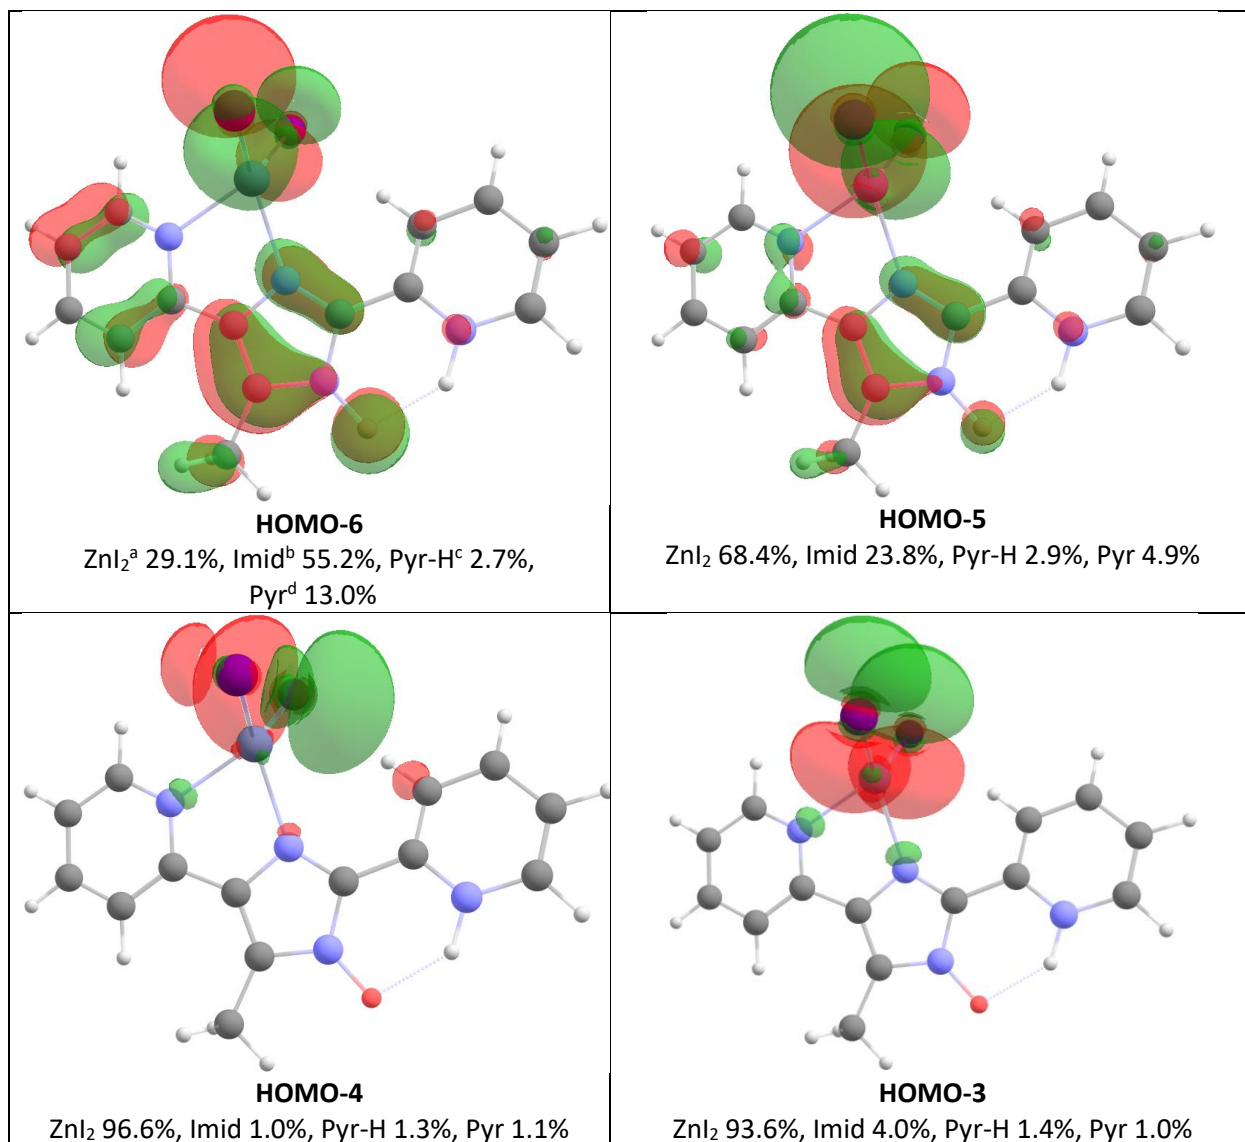

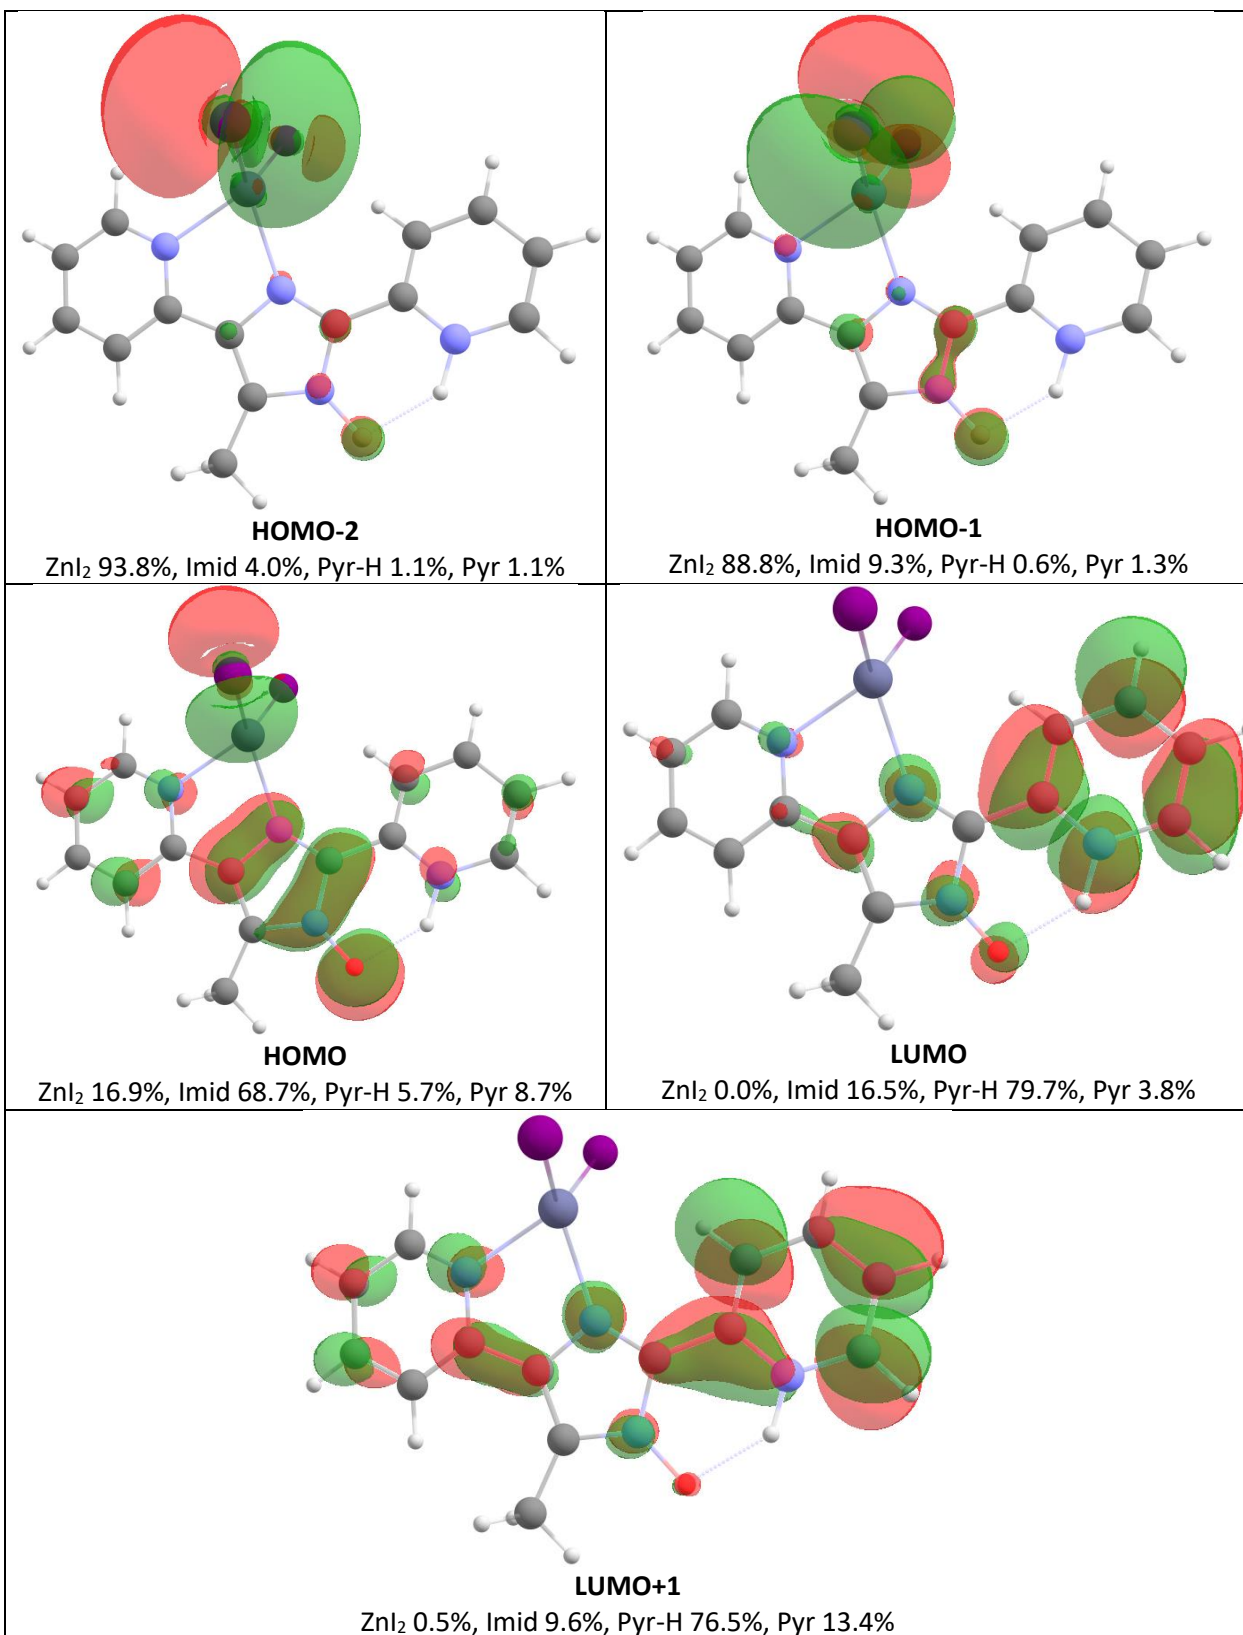

a – Zn<sub>1</sub> group  
 b – Imidazole ring  
 c – proton accepting pyridine ring  
 d – second pyridine ring

**Table S41.** Isosurface contour plots of the molecular orbitals of **ZnHCl<sub>2</sub>** at the **first singlet excited state** geometry (**tautomeric form, S<sub>1</sub><sup>T</sup>**, M062X/6-31+g(d) level of theory). Orbital decomposition resulting from Mulliken population analysis.

**S<sub>1</sub><sup>T</sup> → S<sub>0</sub><sup>T</sup> is LUMO → HOMO transition (98.0%), λ = 509 nm, f = 0.1262**

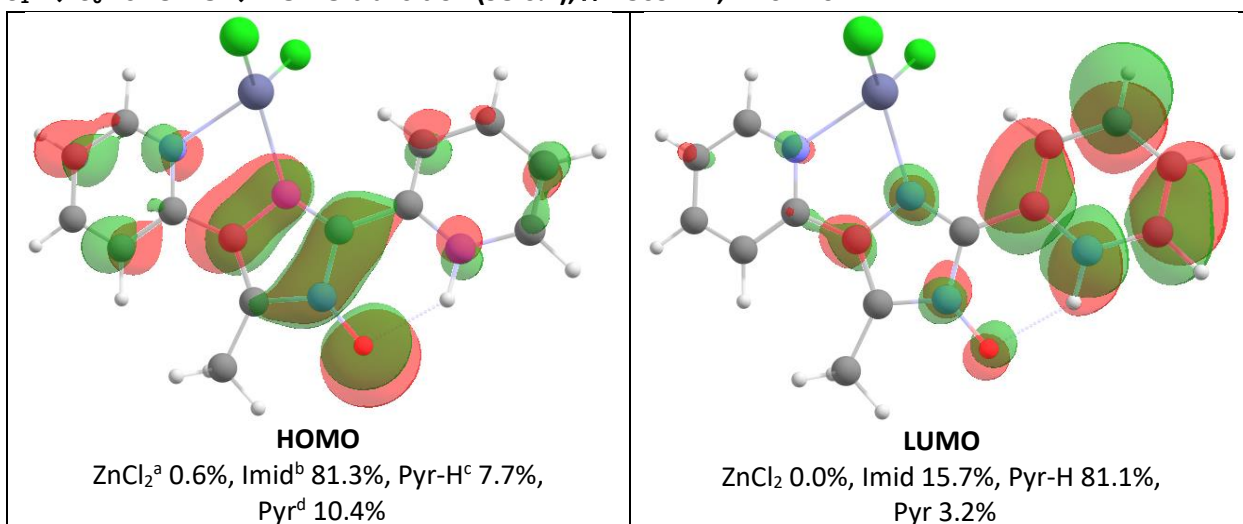

- a – ZnCl<sub>2</sub> group
- b – Imidazole ring
- c – proton accepting pyridine ring
- d – second pyridine ring

**Table S42.** Isosurface contour plots of the molecular orbitals of **ZnHBr<sub>2</sub>** at the **first singlet excited state** geometry (**tautomeric form, S<sub>1</sub><sup>T</sup>**, M062X/6-31+g(d) level of theory). Orbital decomposition resulting from Mulliken population analysis.

**S<sub>1</sub><sup>T</sup> → S<sub>0</sub><sup>T</sup> is LUMO → HOMO transition (97.9%), λ = 510 nm, f = 0.1208**

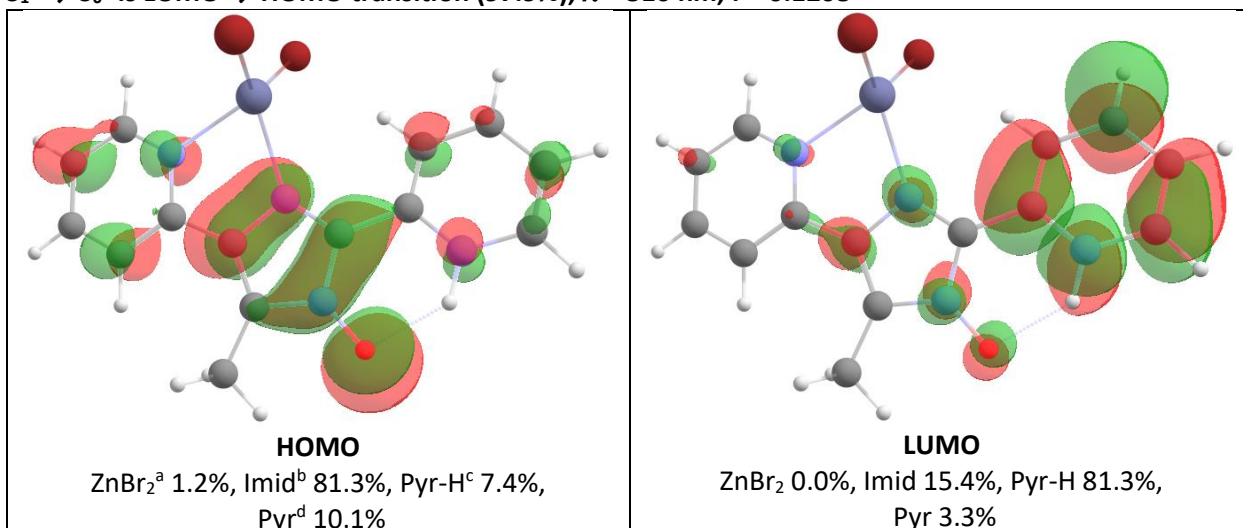

- a – ZnBr<sub>2</sub> group
- b – Imidazole ring
- c – proton accepting pyridine ring
- d – second pyridine ring

**Table S43.** Isosurface contour plots of the molecular orbitals of **ZnHLLi<sub>2</sub>** at the **first singlet excited state** geometry (**tautomeric form, S<sub>1</sub><sup>T</sup>**, M062X/6-31+g(d) level of theory). Orbital decomposition resulting from Mulliken population analysis.

**S<sub>1</sub><sup>T</sup> → S<sub>0</sub><sup>T</sup> is LUMO → HOMO transition (94.4%), λ = 507 nm, f = 0.1182**

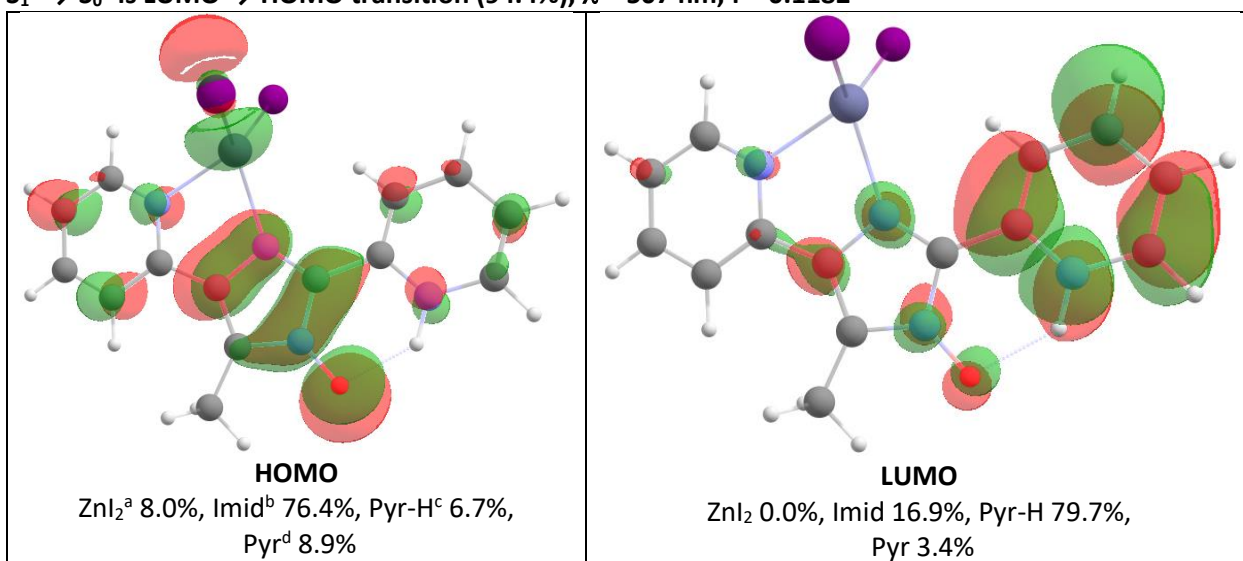

- a – ZnI<sub>2</sub> group
- b – Imidazole ring
- c – first pyridine ring (which is coordinated to Zn atom)
- d – second pyridine ring (which is not coordinated to Zn atom)

**Table S44.** Isosurface contour plots of the molecular orbitals of **ZnHLCI<sub>2</sub>** at the **second singlet excited state** geometry (**tautomeric form, S<sub>2</sub><sup>T</sup>**, M062X/6-31+g(d) level of theory). Orbital decomposition resulting from Mulliken population analysis.

**S<sub>2</sub><sup>T</sup> → S<sub>0</sub><sup>T</sup> is LUMO → HOMO-1 transition (98.3%), λ = 379 nm, f = 0.1276**

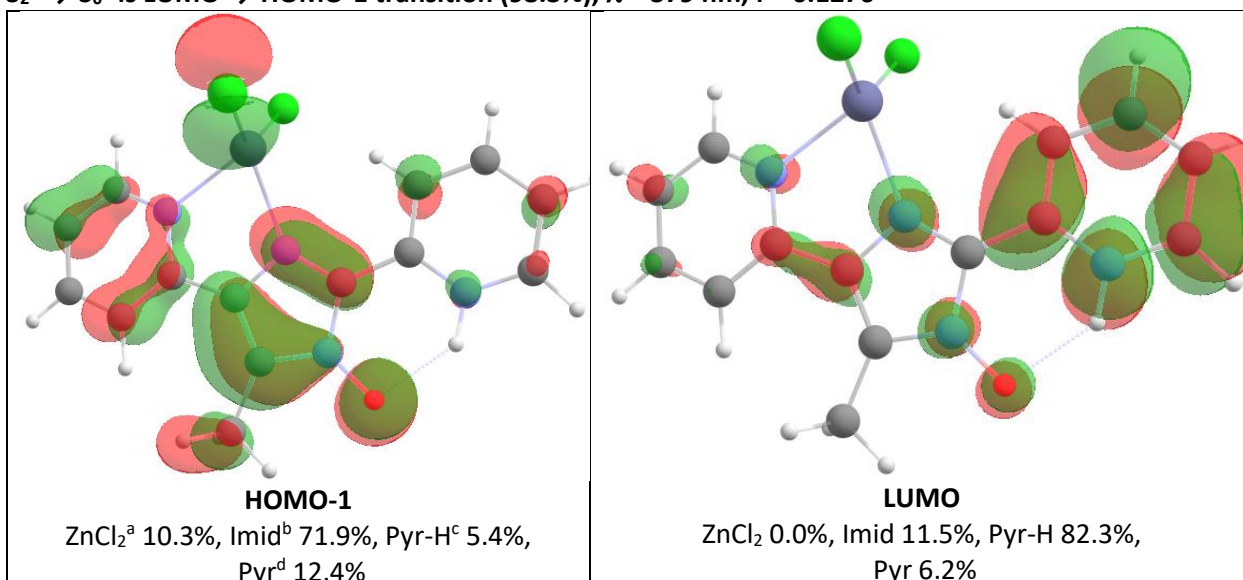

- a – ZnCl<sub>2</sub> group
- b – Imidazole ring
- c – proton accepting pyridine ring
- d – second pyridine ring

**Table S45.** Isosurface contour plots of the molecular orbitals of **ZnHClCl<sub>2</sub>** at the **first singlet excited state** geometry (**minor component, S<sub>1</sub><sup>minor</sup>**, M062X/6-31+g(d) level of theory). Orbital decomposition resulting from Mulliken population analysis.

**S<sub>1</sub><sup>minor</sup> → S<sub>0</sub><sup>minor</sup> is LUMO → HOMO transition (97.4%), λ = 491 nm, f = 0.1884**

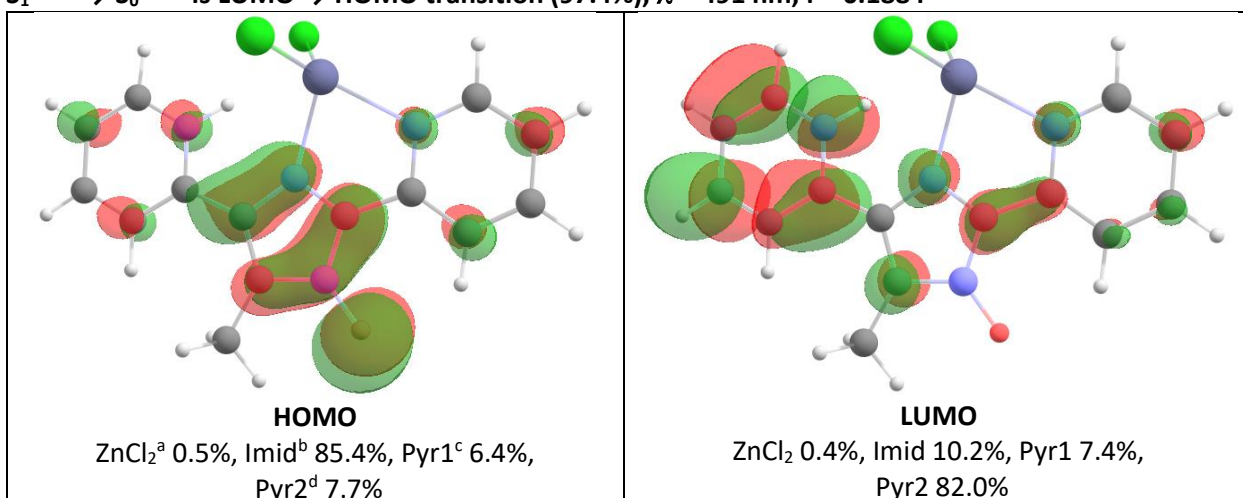

- a – ZnCl<sub>2</sub> group
- b – Imidazole ring
- c – first pyridine ring (which is coordinated to Zn atom)
- d – second pyridine ring (which is not coordinated to Zn atom)

**Table S46.** Isosurface contour plots of the molecular orbitals of **ZnHLBr<sub>2</sub>** at the **first singlet excited state** geometry (**minor component, S<sub>1</sub><sup>minor</sup>**, M062X/6-31+g(d) level of theory). Orbital decomposition resulting from Mulliken population analysis.

**S<sub>1</sub><sup>minor</sup> → S<sub>0</sub><sup>minor</sup> is LUMO → HOMO transition (97.4%), λ = 493 nm, f = 0.1804**

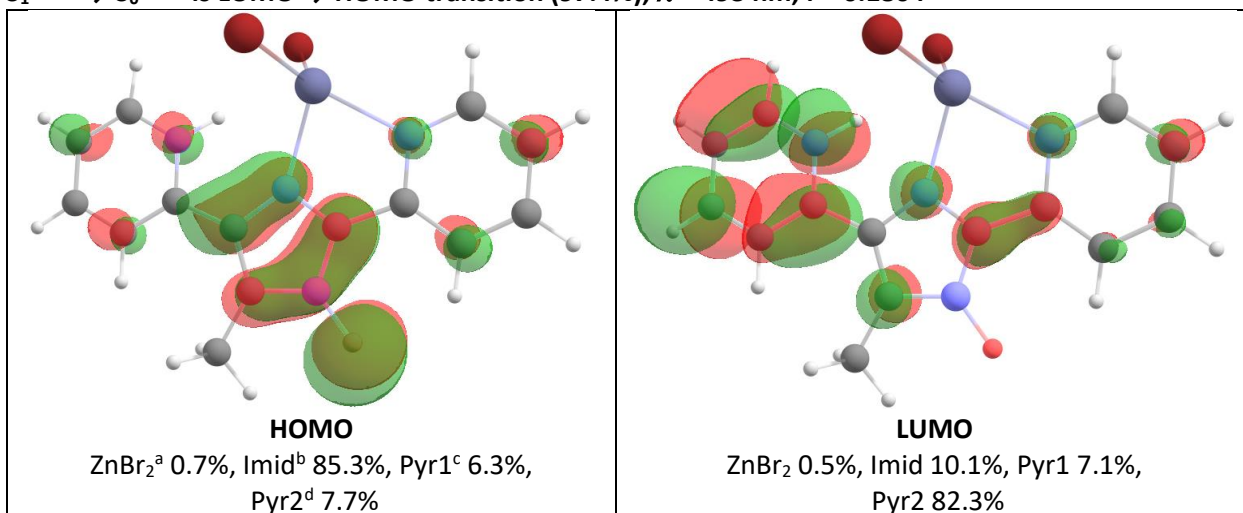

- a – ZnBr<sub>2</sub> group
- b – Imidazole ring
- c – first pyridine ring (which is coordinated to Zn atom)
- d – second pyridine ring (which is not coordinated to Zn atom)

**Table S47.** Isosurface contour plots of the molecular orbitals of **ZnHLI<sub>2</sub>** at the **first singlet excited state geometry (minor component, S<sub>1</sub><sup>minor</sup>, M062X/6-31+g(d) level of theory)**. Orbital decomposition resulting from Mulliken population analysis.

**S<sub>1</sub><sup>minor</sup> → S<sub>0</sub><sup>minor</sup> is LUMO → HOMO transition (97.3%), λ = 494 nm, f = 0.1720**

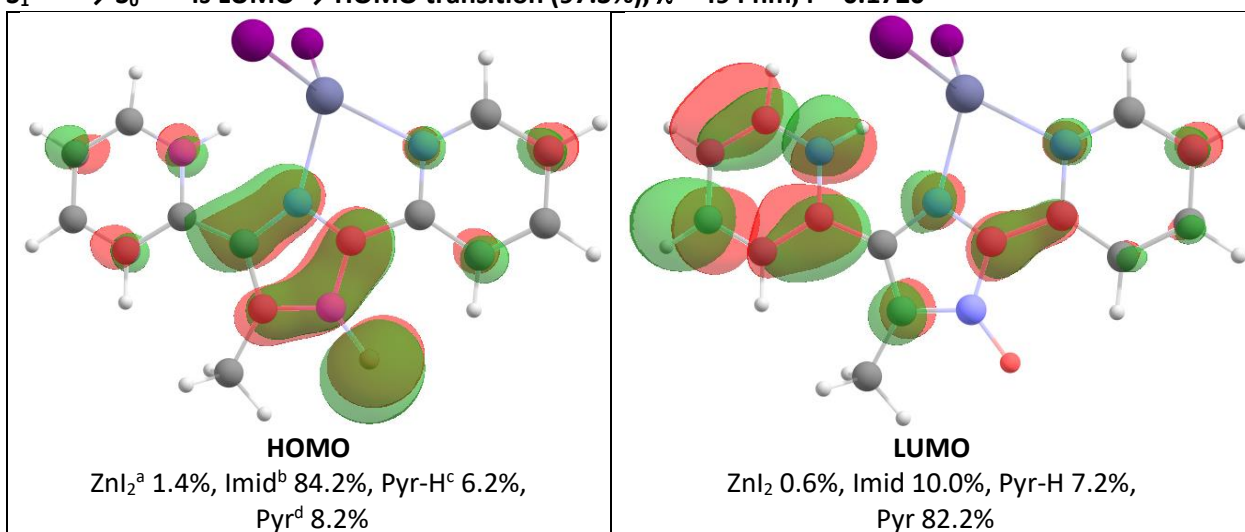

- a – ZnI<sub>2</sub> group
- b – Imidazole ring
- c – first pyridine ring (which is coordinated to Zn atom)
- d – second pyridine ring (which is not coordinated to Zn atom)

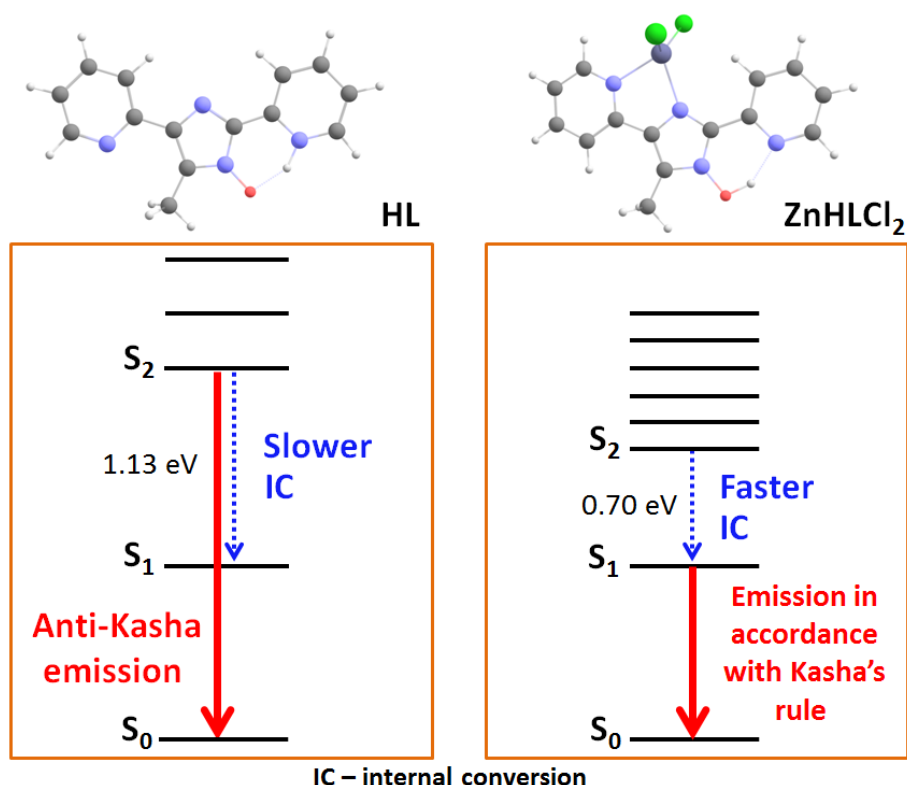

**Figure S28.** Comparison of the emission mechanisms of the free ligand **HL** and the complex **ZnHLCl<sub>2</sub>**.
